# Supplementary material
Source: Frontiers journal article supplement (https://www.frontiersin.org/articles/528751)
Supplement: Data_Sheet_1.xlsx [file Data_Sheet_1.xlsx]

## Sheet: Supplementary Table 1
Supplementary Table 1. Mutation counts between CLDN18-ARHGAP (+) and CLDN18-ARHGAP26/6 (-) group in the cohort of Shu et al (N=32).
Gene Name	CLDN18-AHRGAP26/6 (+) group (N=8)	CLDN18-AHRGAP26/6 (-) group (N=24)	P value
PABPC3	3	0	0.0112903
SRRD	3	1	0.0393215
HERC2	4	3	0.0468873
TMIE	2	0	0.0564516
AHNAK2	2	0	0.0564516
SLC2A3	2	0	0.0564516
COL6A3	2	0	0.0564516
MGA	2	0	0.0564516
SLC2A5	2	0	0.0564516
FAM90A1	2	0	0.0564516
SETD1B	2	0	0.0564516
ERBB2	2	0	0.0564516
FBXW7	2	0	0.0564516
PTPRS	2	0	0.0564516
ZNF254	2	0	0.0564516
CSMD3	2	0	0.0564516
KCNA6	2	0	0.0564516
OGFR	2	0	0.0564516
PRG4	2	0	0.0564516
SPRR2E	2	0	0.0564516
KRTAP10-6	2	0	0.0564516
RPTN	2	1	0.146774
CHRNA7	2	1	0.146774
PRAMEF1	2	1	0.146774
DGKZ	2	1	0.146774
BPTF	2	1	0.146774
PRB1	2	1	0.146774
COL18A1	2	1	0.146774
NEFH	2	1	0.146774
IRF2BPL	3	3	0.147911
MYO19	0	7	0.149715
SELPLG	4	4	0.152169
NOVA1	1	0	0.25
FGD5	1	0	0.25
LARP1	1	0	0.25
PCDHB12	1	0	0.25
ZNF273	1	0	0.25
PCDHAC1	1	0	0.25
SKOR1	1	0	0.25
ZNF429	1	0	0.25
CD1C	1	0	0.25
NKX3-1	1	0	0.25
LBX1	1	0	0.25
LOC100288814	1	0	0.25
ITGAM	1	0	0.25
PSIP1	1	0	0.25
RREB1	1	0	0.25
BAI3	1	0	0.25
PCDHGC3	1	0	0.25
POR	1	0	0.25
COL14A1	1	0	0.25
SPTBN2	1	0	0.25
NCR1	1	0	0.25
PHLDB1	1	0	0.25
KRT81	1	0	0.25
SERTM1	1	0	0.25
MARK2	1	0	0.25
ZFR2	1	0	0.25
SOGA1	1	0	0.25
BPIFA3	1	0	0.25
PCSK6	1	0	0.25
CHI3L1	1	0	0.25
ABCA1	1	0	0.25
LPPR3	1	0	0.25
TLL1	1	0	0.25
HS3ST6	1	0	0.25
PARD3B	1	0	0.25
WDR82	1	0	0.25
RP1	1	0	0.25
CCDC175	1	0	0.25
TBKBP1	1	0	0.25
RNF217	1	0	0.25
KCNAB1	1	0	0.25
ZNF813	1	0	0.25
DMRTB1	1	0	0.25
CASS4	1	0	0.25
ADH6	1	0	0.25
TIMELESS	1	0	0.25
AIFM1	1	0	0.25
GOLGA8M	1	0	0.25
ZNF570	1	0	0.25
VEPH1	1	0	0.25
DCHS2	1	0	0.25
C9orf66	1	0	0.25
ZNF512B	1	0	0.25
MRC2	1	0	0.25
MCFD2	1	0	0.25
ARHGAP5	1	0	0.25
DCHS1	1	0	0.25
ZNF708	1	0	0.25
AHCYL1	1	0	0.25
KBTBD12	1	0	0.25
LDLRAD1	1	0	0.25
CLCN7	1	0	0.25
PIDD1	1	0	0.25
KRT10	1	0	0.25
RASGRF1	1	0	0.25
SLC5A11	1	0	0.25
TMCC2	1	0	0.25
WBSCR16	1	0	0.25
USP6	1	0	0.25
NRG3	1	0	0.25
CSMD2	1	0	0.25
DST	1	0	0.25
ZNF224	1	0	0.25
STAG2	1	0	0.25
ITGA11	1	0	0.25
KIAA0513	1	0	0.25
ZNF516	1	0	0.25
ARHGAP26	1	0	0.25
PCDHAC2	1	0	0.25
PIGU	1	0	0.25
FAM175A	1	0	0.25
CNTNAP3B	1	0	0.25
HRH3	1	0	0.25
SLC35A2	1	0	0.25
XYLB	1	0	0.25
CCDC40	1	0	0.25
AMER1	1	0	0.25
GRID1	1	0	0.25
RNF43	1	0	0.25
C8orf74	1	0	0.25
KRTAP2-3	1	0	0.25
PRRT4	1	0	0.25
SGCA	1	0	0.25
KLHL40	1	0	0.25
ARHGEF2	1	0	0.25
SLC22A7	1	0	0.25
SNX9	1	0	0.25
HDGFRP2	1	0	0.25
CES4A	1	0	0.25
USH2A	1	0	0.25
GRM7	1	0	0.25
GFY	1	0	0.25
POPDC2	1	0	0.25
SPOCD1	1	0	0.25
PIK3R2	1	0	0.25
CYP3A7	1	0	0.25
PFDN5	1	0	0.25
PRR12	1	0	0.25
DIRAS3	1	0	0.25
PCDHB9	1	0	0.25
KIAA2022	1	0	0.25
CD97	1	0	0.25
BFSP1	1	0	0.25
PECR	1	0	0.25
RET	1	0	0.25
PLEKHG4B	1	0	0.25
SLC13A3	1	0	0.25
AP5B1	1	0	0.25
PUM1	1	0	0.25
PPP1R3A	1	0	0.25
RBM6	1	0	0.25
ATXN2L	1	0	0.25
BRCA1	1	0	0.25
ENTHD2	1	0	0.25
PROX1	1	0	0.25
SSTR2	1	0	0.25
FER	1	0	0.25
FBRSL1	1	0	0.25
HAVCR1	1	0	0.25
INTS3	1	0	0.25
CLUH	1	0	0.25
S100A13	1	0	0.25
CTDP1	1	0	0.25
ARHGEF33	1	0	0.25
IL32	1	0	0.25
HMCN1	1	0	0.25
SLC6A14	1	0	0.25
LIM2	1	0	0.25
CCDC168	1	0	0.25
LONRF1	1	0	0.25
ARNT	1	0	0.25
MAG	1	0	0.25
ERICH2	1	0	0.25
ENO4	1	0	0.25
PAX4	1	0	0.25
TMEM55A	1	0	0.25
TARP	1	0	0.25
ATP9A	1	0	0.25
PARP10	1	0	0.25
XPO6	1	0	0.25
HCN1	1	0	0.25
SUSD1	1	0	0.25
PRKAR1B	1	0	0.25
DCDC5	1	0	0.25
TAS2R16	1	0	0.25
CHRM4	1	0	0.25
FLNC	1	0	0.25
SACS	1	0	0.25
EPHB3	1	0	0.25
TNRC6C	1	0	0.25
ST8SIA6	1	0	0.25
IGSF1	1	0	0.25
HNRNPH2	1	0	0.25
HMG20B	1	0	0.25
ENOX1	1	0	0.25
GTF2IRD2	1	0	0.25
CLK2	1	0	0.25
ALX4	1	0	0.25
SERPINE1	1	0	0.25
SLC4A2	1	0	0.25
ATP8B3	1	0	0.25
MAP3K15	1	0	0.25
IBTK	1	0	0.25
TEAD1	1	0	0.25
FAM3A	1	0	0.25
CRACR2A	1	0	0.25
N4BP2L1	1	0	0.25
CD109	1	0	0.25
AP4M1	1	0	0.25
HOXD9	1	0	0.25
SLC35E2	1	0	0.25
ESPNL	1	0	0.25
TMF1	1	0	0.25
ASH2L	1	0	0.25
RPL22	1	0	0.25
DDHD1	1	0	0.25
C2orf81	1	0	0.25
CHST1	1	0	0.25
MTERF4	1	0	0.25
KRTAP4-8	1	0	0.25
PREX1	1	0	0.25
STX7	1	0	0.25
PSMC4	1	0	0.25
NOMO3	1	0	0.25
UQCC1	1	0	0.25
GNS	1	0	0.25
MEGF11	1	0	0.25
SNTG2	1	0	0.25
TJP3	1	0	0.25
NARF	1	0	0.25
PXDN	1	0	0.25
NBEA	1	0	0.25
RPS6KL1	1	0	0.25
NPHP4	1	0	0.25
ZNF517	1	0	0.25
KRT2	1	0	0.25
ARHGEF5	1	0	0.25
FNBP4	1	0	0.25
RAD21	1	0	0.25
MEX3C	1	0	0.25
HP1BP3	1	0	0.25
CRIPAK	1	0	0.25
CRAMP1L	1	0	0.25
GABRG2	1	0	0.25
RPL39	1	0	0.25
DOCK5	1	0	0.25
MST1	1	0	0.25
PDHA2	1	0	0.25
KDM6A	1	0	0.25
ZNF682	1	0	0.25
HAS1	1	0	0.25
CLEC2L	1	0	0.25
ARID3A	1	0	0.25
SOCS3	1	0	0.25
MYBPC1	1	0	0.25
LPA	1	0	0.25
PHF20L1	1	0	0.25
OR4K5	1	0	0.25
ZIC4	1	0	0.25
PRB2	1	0	0.25
MCM4	1	0	0.25
MAP7D1	1	0	0.25
MPLKIP	1	0	0.25
BCL2L2	1	0	0.25
TOR1AIP1	1	0	0.25
CEP131	1	0	0.25
THSD7A	1	0	0.25
NXF5	1	0	0.25
PDE6B	1	0	0.25
TOP1MT	1	0	0.25
DICER1	1	0	0.25
INSR	1	0	0.25
MYBPC2	1	0	0.25
KCNA4	1	0	0.25
KPNA4	1	0	0.25
PRTG	1	0	0.25
TNNI1	1	0	0.25
KRT35	1	0	0.25
FAM155B	1	0	0.25
TRNAU1AP	1	0	0.25
MYO15A	1	0	0.25
LCP2	1	0	0.25
RFPL2	1	0	0.25
SERPINB10	1	0	0.25
UNC80	1	0	0.25
MROH9	1	0	0.25
AR	1	0	0.25
CAD	1	0	0.25
DOT1L	1	0	0.25
PPP1R2	1	0	0.25
ATP2A1	1	0	0.25
HGSNAT	1	0	0.25
MTOR	1	0	0.25
LOC729159	1	0	0.25
ZCCHC5	1	0	0.25
IL7	1	0	0.25
TIGD7	1	0	0.25
ZP3	1	0	0.25
JARID2	1	0	0.25
CARD9	1	0	0.25
SAFB	1	0	0.25
CROCC	1	0	0.25
FAM71A	1	0	0.25
GPIHBP1	1	0	0.25
FRMPD1	1	0	0.25
GLT1D1	1	0	0.25
FAM200B	1	0	0.25
NCAN	1	0	0.25
OR13H1	1	0	0.25
EPHA3	1	0	0.25
CFAP43	1	0	0.25
MYO1H	1	0	0.25
MSLN	1	0	0.25
PITPNM2	1	0	0.25
ACRC	1	0	0.25
TCOF1	1	0	0.25
XBP1	1	0	0.25
PAPPA	1	0	0.25
OR5T2	1	0	0.25
OBSCN	1	0	0.25
DCT	1	0	0.25
ADRA1A	1	0	0.25
OR52L1	1	0	0.25
NYAP2	1	0	0.25
NGFR	1	0	0.25
CCDC180	1	0	0.25
ESRRB	1	0	0.25
CACNA1D	1	0	0.25
FBXO10	1	0	0.25
LDLRAD3	1	0	0.25
BPHL	1	0	0.25
PNPLA7	1	0	0.25
PTBP2	1	0	0.25
FIG4	1	0	0.25
PAQR8	1	0	0.25
CYP1B1	1	0	0.25
EYS	1	0	0.25
CLASRP	1	0	0.25
TGFBR1	1	0	0.25
TMEM53	1	0	0.25
RCN3	1	0	0.25
UBE4A	1	0	0.25
HK2	1	0	0.25
DHRS4	1	0	0.25
RAB42	1	0	0.25
PACRG	1	0	0.25
CES3	1	0	0.25
KRT74	1	0	0.25
SF3A3	1	0	0.25
ZNF775	1	0	0.25
RSU1	1	0	0.25
GABRB2	1	0	0.25
SIGLEC1	1	0	0.25
RNF215	1	0	0.25
EXT1	1	0	0.25
CAMSAP3	1	0	0.25
MED12	1	0	0.25
SCN5A	1	0	0.25
FAM193B	1	0	0.25
LMNB2	1	0	0.25
ACACA	1	0	0.25
RPAP1	1	0	0.25
GGA1	1	0	0.25
CACTIN	1	0	0.25
TRIM24	1	0	0.25
FOXK1	1	0	0.25
C7orf55-LUC7L2	1	0	0.25
KANK3	1	0	0.25
CHRM2	1	0	0.25
COL21A1	1	0	0.25
ATP7A	1	0	0.25
ZNF423	1	0	0.25
NKAIN2	1	0	0.25
ATP8A2	1	0	0.25
PDCD2L	1	0	0.25
CLEC19A	1	0	0.25
MXRA5	1	0	0.25
CLSPN	1	0	0.25
DOCK6	1	0	0.25
MYO7B	1	0	0.25
CDKL4	1	0	0.25
C14orf37	1	0	0.25
GLUD2	1	0	0.25
FCGR2C	1	0	0.25
SIK2	1	0	0.25
F8	1	0	0.25
SORBS3	1	0	0.25
ASCC3	1	0	0.25
EPHA5	1	0	0.25
WBP1	1	0	0.25
FBN2	1	0	0.25
FKBP9	1	0	0.25
TTC38	1	0	0.25
RBM33	1	0	0.25
WSCD1	1	0	0.25
STX18	1	0	0.25
NOD2	1	0	0.25
KLHL13	1	0	0.25
SPATA21	1	0	0.25
AP1G1	1	0	0.25
FKBP6	1	0	0.25
TGFBR2	1	0	0.25
LAMC3	1	0	0.25
BBS10	1	0	0.25
HRAS	1	0	0.25
GOLGA6L22	1	0	0.25
SKIDA1	1	0	0.25
ANGPTL2	1	0	0.25
GPR68	1	0	0.25
FAM171B	1	0	0.25
GDF7	1	0	0.25
KLHDC8B	1	0	0.25
ALPP	1	0	0.25
SUPT6H	1	0	0.25
GABRB3	1	0	0.25
RMDN2	1	0	0.25
ZXDC	1	0	0.25
TMOD1	1	0	0.25
DNAJC5B	1	0	0.25
CBLN2	1	0	0.25
MATK	1	0	0.25
MRPL14	1	0	0.25
TCF7L1	1	0	0.25
CACNG8	1	0	0.25
ORC3	1	0	0.25
ZNF652	1	0	0.25
PLIN3	1	0	0.25
MDN1	1	0	0.25
PRPF4	1	0	0.25
BANK1	1	0	0.25
MAP9	1	0	0.25
LRRC47	1	0	0.25
ARID1A	1	0	0.25
PLXND1	1	0	0.25
TRIM61	1	0	0.25
EPHA6	1	0	0.25
CYFIP2	1	0	0.25
PRAMEF12	1	0	0.25
SMC1B	1	0	0.25
EHD2	1	0	0.25
MESP1	1	0	0.25
TCTN2	1	0	0.25
MFHAS1	1	0	0.25
CADPS	1	0	0.25
NME3	1	0	0.25
BSPRY	1	0	0.25
ANXA11	1	0	0.25
DIP2C	1	0	0.25
TRPA1	1	0	0.25
SNX27	1	0	0.25
C8orf89	1	0	0.25
DDX42	1	0	0.25
FLRT2	1	0	0.25
MYCT1	1	0	0.25
IGDCC3	1	0	0.25
RIPK4	1	0	0.25
PHYHIP	1	0	0.25
OTOF	1	0	0.25
CTNND1	1	0	0.25
CLEC16A	1	0	0.25
CYP4X1	1	0	0.25
ZNF610	1	0	0.25
AGT	1	0	0.25
ISLR2	1	0	0.25
CNNM1	1	0	0.25
CEP170B	1	0	0.25
PAGE5	1	0	0.25
UBN2	1	0	0.25
ERCC6L2	1	0	0.25
HDAC4	1	0	0.25
AGAP2	1	0	0.25
BLVRA	1	0	0.25
THBS2	1	0	0.25
PRODH2	1	0	0.25
TMPRSS13	1	0	0.25
SORCS1	1	0	0.25
FLT4	1	0	0.25
ZNF585B	1	0	0.25
RGL3	1	0	0.25
THOP1	1	0	0.25
MADD	1	0	0.25
XPA	1	0	0.25
COL5A1	1	0	0.25
FBXW8	1	0	0.25
GLB1L3	1	0	0.25
TMEM132E	1	0	0.25
SLC22A11	1	0	0.25
CCDC109B	1	0	0.25
C7orf31	1	0	0.25
FAM183A	1	0	0.25
TNS1	1	0	0.25
CHST14	1	0	0.25
PTGR2	1	0	0.25
PCTP	1	0	0.25
PTPN9	1	0	0.25
ZFYVE1	1	0	0.25
CFAP74	1	0	0.25
PCDHGA12	1	0	0.25
RUSC1	2	2	0.254227
MUC5B	2	2	0.254227
MESP2	2	2	0.254227
PIK3CA	2	2	0.254227
ZFHX4	2	2	0.254227
FMN2	2	2	0.254227
RFPL4AL1	2	2	0.254227
PRAMEF11	0	5	0.29644
HGC6.3	0	6	0.29644
CD209	0	5	0.29644
TP53	3	5	0.378462
ZNF93	1	1	0.443548
ABCA9	1	1	0.443548
PCLO	1	1	0.443548
CACNA1A	1	1	0.443548
ZNF737	1	1	0.443548
REXO1	1	1	0.443548
ASXL1	1	1	0.443548
COL17A1	1	1	0.443548
ADAMTS7	1	1	0.443548
DUOX1	1	1	0.443548
CDHR5	1	1	0.443548
AGAP6	1	1	0.443548
ARHGEF40	1	1	0.443548
GOLGA6A	1	1	0.443548
NR0B1	1	1	0.443548
PABPC1	1	1	0.443548
SPZ1	1	1	0.443548
CDK11A	1	1	0.443548
BAIAP2L2	1	1	0.443548
CBWD3	1	1	0.443548
DNAH5	1	1	0.443548
SPDYE1	1	1	0.443548
NCKAP1	1	1	0.443548
ABCC10	1	1	0.443548
GOLGA8K	1	1	0.443548
PRR21	1	1	0.443548
ADCY1	1	1	0.443548
SYNE1	1	1	0.443548
KDM4E	1	1	0.443548
AMER3	1	1	0.443548
GPR126	1	1	0.443548
RIMS1	1	1	0.443548
DNAH10	1	1	0.443548
ZNF98	1	1	0.443548
GPR158	1	1	0.443548
ZFPM1	1	1	0.443548
VCX3A	1	1	0.443548
DOCK10	1	1	0.443548
ZNF43	1	1	0.443548
ZAN	1	1	0.443548
LRP1B	1	1	0.443548
ZNF787	1	1	0.443548
ASCL1	1	1	0.443548
OR2T33	1	1	0.443548
FOXD4L1	1	1	0.443548
KMT2D	1	1	0.443548
PLEC	1	1	0.443548
SGK223	1	1	0.443548
BOC	1	1	0.443548
ATN1	1	1	0.443548
TMEM108	1	1	0.443548
ADAMTSL3	1	1	0.443548
NISCH	1	1	0.443548
DCAF8L2	1	1	0.443548
RAB6B	1	1	0.443548
EIF5AL1	1	1	0.443548
ZNF99	1	1	0.443548
LCE1F	1	1	0.443548
RBMX	1	1	0.443548
TNRC6A	1	1	0.443548
KRTAP5-2	1	1	0.443548
DNHD1	1	1	0.443548
ZNF257	0	4	0.549722
ZNF814	0	4	0.549722
ANKRD36	0	4	0.549722
NBPF8	0	4	0.549722
PRB3	0	4	0.549722
CDH1	0	4	0.549722
CYP4F2	0	4	0.549722
PRIM2	0	4	0.549722
KRTAP4-5	0	4	0.549722
HNRNPCL2	0	3	0.554839
MUC12	0	3	0.554839
KRTAP4-3	0	3	0.554839
FCGBP	0	3	0.554839
HRCT1	0	3	0.554839
WASH1	0	3	0.554839
PDE4DIP	0	3	0.554839
MMP12	0	3	0.554839
CLEC18B	0	3	0.554839
ZNF208	0	3	0.554839
PRX	0	3	0.554839
NEB	0	3	0.554839
MST1L	0	3	0.554839
LOC100129697	0	3	0.554839
HSPA6	0	3	0.554839
IGFBP2	0	3	0.554839
ARMCX4	0	3	0.554839
ZNF90	0	3	0.554839
FLG	0	3	0.554839
ZNF717	0	3	0.554839
AHNAK	0	3	0.554839
ZNF729	0	3	0.554839
CCNB3	0	3	0.554839
KMT2C	2	3	0.577864
NACAD	2	3	0.577864
GTF2I	2	3	0.577864
ATAD3B	2	3	0.577864
PRDM9	2	3	0.577864
MUC17	2	3	0.577864
RHPN2	2	3	0.577864
ALMS1	2	3	0.577864
GPRIN1	2	3	0.577864
MAGEC1	2	4	0.624768
KRTAP5-10	2	4	0.624768
ANKRD20A4	2	4	0.624768
NBPF1	2	4	0.624768
TCHH	1	7	0.641702
MUC19	2	9	0.680786
MUC4	2	9	0.680786
C6	0	1	1
ABCC5	0	1	1
GOLGA6L6	0	2	1
LZTS1	0	1	1
SCD	0	1	1
CRYBA4	0	0	1
ABCA12	0	0	1
OR51M1	0	0	1
SPATA5	0	1	1
RBM19	0	1	1
PRR36	1	2	1
RNF34	0	1	1
DCSTAMP	0	0	1
ANKRD44	0	0	1
TGIF2LX	0	0	1
CSPG4	0	0	1
FRG2C	0	1	1
TNRC18	0	0	1
TRIP6	0	1	1
MAP2K7	0	1	1
GBP6	0	0	1
ZNF331	0	0	1
ZDHHC15	0	1	1
AMBRA1	0	1	1
SYCE1	0	0	1
SLC35A4	0	0	1
STK32C	0	1	1
FRAS1	0	0	1
PVRIG	0	1	1
C22orf34	0	0	1
THOC3	0	2	1
ZDBF2	0	1	1
THSD7B	0	1	1
SPATA31A5	0	1	1
MYRIP	0	1	1
CRTC2	0	0	1
SCAF1	0	1	1
HR	0	0	1
FSCB	0	1	1
VCX3B	0	0	1
PTPRQ	0	0	1
CETP	0	0	1
CPNE8	0	1	1
FAM47C	0	1	1
NLRP14	0	1	1
FAM135B	0	1	1
BCR	0	1	1
ANGPT1	0	1	1
FAM47A	0	0	1
WNT8B	0	1	1
FGFRL1	0	1	1
ZNF850	0	0	1
UBE2O	0	1	1
DAGLB	0	0	1
PRKRIR	0	1	1
MALRD1	0	1	1
RTL1	0	0	1
SLIT2	0	1	1
ZNF559	0	1	1
SPATA31E1	0	1	1
SULF1	0	1	1
IFNA17	0	0	1
MGAM	0	0	1
C1orf159	0	1	1
ADAMTS16	0	2	1
OR7G3	0	1	1
TUBA3D	1	2	1
LATS2	0	1	1
USP17L20	0	1	1
ADAM22	0	0	1
NOS2	0	1	1
PER2	0	0	1
HOXD12	0	1	1
ARID2	0	0	1
SUOX	0	0	1
CEP250	0	1	1
NOS1	0	0	1
PNPLA2	0	0	1
LGR4	0	1	1
TUBA1A	0	0	1
MADCAM1	0	1	1
KRTAP5-5	1	3	1
FCRL3	0	1	1
MAP3K2	0	1	1
ASTN1	0	1	1
PCDHB10	0	2	1
UNC93B1	1	2	1
BAIAP2	0	1	1
ANKRD10	0	1	1
NEDD4L	0	1	1
ZNF727	1	2	1
IGF1R	0	0	1
SAAL1	0	0	1
F5	0	1	1
GATAD1	0	1	1
ZNF728	0	1	1
SRRM5	0	2	1
KIF25	0	1	1
OR11H1	0	1	1
MAML2	0	1	1
IL4R	0	1	1
NMB	0	1	1
KLHL34	0	1	1
C2orf16	0	2	1
FOXD4	0	2	1
C17orf102	0	0	1
SWAP70	0	0	1
SHC4	0	1	1
MSH3	1	3	1
TMEM132D	0	1	1
PCDHB7	0	1	1
ZNF595	0	1	1
MUC16	1	5	1
SRCAP	0	1	1
ATXN7	0	1	1
LOC645382	0	1	1
HIST1H2AA	0	1	1
POU4F2	0	1	1
GJD4	0	0	1
DPP10	0	0	1
SLC39A11	0	1	1
CCDC51	0	1	1
ELFN2	0	1	1
DPEP2	0	1	1
WDR88	0	1	1
FAM157A	0	1	1
ZIC5	0	2	1
PCDHGA5	0	0	1
NCAM2	0	0	1
IGLL1	0	1	1
BRINP1	0	1	1
CTAGE5	0	2	1
TPO	0	0	1
NYAP1	0	0	1
CNTNAP3	0	0	1
RPGR	1	3	1
MCC	0	1	1
GRIN2B	0	0	1
SELO	0	1	1
PER1	0	0	1
FMNL1	0	1	1
ZNF672	0	1	1
SEMA6A	0	1	1
GAGE12J	0	0	1
ZNF419	0	0	1
PAX7	0	0	1
MAP2	0	0	1
TRIM47	0	1	1
LOC100129520	0	2	1
NEURL1B	0	1	1
VASH1	0	1	1
PCDHB5	0	0	1
KMT2E	0	1	1
GNAL	0	1	1
NAP1L3	0	0	1
NTHL1	0	0	1
RTBDN	0	0	1
KIF16B	0	1	1
GTF2IRD2	0	0	1
DACH2	0	0	1
TMC6	0	0	1
RBMXL3	0	1	1
MAFA	0	0	1
SERINC4	0	0	1
KCNA5	0	1	1
ABCA13	0	2	1
KIAA0922	0	0	1
PKP1	0	0	1
RRP7A	0	1	1
USP32	0	1	1
ATAD5	0	1	1
C11orf74	0	0	1
SCN7A	0	1	1
MBNL3	0	0	1
ZDHHC11	0	2	1
MYH8	0	0	1
HFM1	0	1	1
KSR2	0	1	1
CATSPERD	0	0	1
CYHR1	0	0	1
IGSF3	0	1	1
KRTAP4-4	0	0	1
ENAM	0	1	1
ASCL4	0	0	1
BCKDK	0	1	1
FAM155A	0	1	1
FBXW10	0	1	1
MPP7	0	1	1
TDG	0	0	1
SLC26A3	0	1	1
PHLDB2	0	1	1
CD163	0	0	1
ASH1L	0	1	1
TSPYL6	0	0	1
OVGP1	0	1	1
ZNF506	0	0	1
HCLS1	0	1	1
FCGR1A	0	1	1
HELZ	0	1	1
OR5H14	0	0	1
ERICH6	0	2	1
ZNF267	0	2	1
CGRRF1	0	1	1
ZNF256	0	0	1
CCDC178	0	0	1
VPS13B	0	1	1
CASC5	0	2	1
BCL2L12	0	1	1
TAPBPL	0	0	1
NAV1	0	1	1
STON2	0	0	1
KLHDC8A	0	1	1
CLTC	0	1	1
UMOD	0	1	1
ATP12A	0	1	1
ZNF117	0	1	1
ZBTB7A	0	1	1
KMT2B	0	1	1
BARD1	0	1	1
PI4KA	0	0	1
TKTL1	0	0	1
OLFML3	0	1	1
PCNT	0	1	1
PRR9	0	1	1
DHX34	0	0	1
KRT79	0	1	1
ZNF530	0	0	1
SBNO2	0	1	1
OR2L2	0	0	1
WWC1	0	1	1
LTBP2	0	1	1
RAET1L	0	0	1
PLXNB1	0	1	1
KIRREL	0	1	1
TPD52L1	0	0	1
SHANK2	0	0	1
PDDC1	0	1	1
FAM181B	0	1	1
GOLGA8O	0	1	1
PPP1R37	0	0	1
NF1	0	1	1
MAGI1	0	0	1
KBTBD2	0	0	1
DNM2	0	0	1
RPGRIP1L	0	1	1
ZNF676	0	0	1
CKAP4	0	1	1
STKLD1	0	1	1
PTPRM	0	1	1
PRR23D1	0	1	1
TANC2	0	0	1
ALDH1B1	0	0	1
CHD1	0	1	1
CEP170	0	2	1
CA9	0	2	1
GABRR1	0	0	1
ZNF749	0	1	1
KRTAP9-7	0	1	1
CD33	0	2	1
BAZ1A	0	0	1
RC3H2	0	0	1
CSMD1	0	0	1
MYBPH	0	1	1
ANKRD30B	0	1	1
SIRPA	0	2	1
FADS6	0	0	1
ZHX2	0	0	1
PRLR	0	1	1
NBPF10	0	0	1
LCE4A	0	1	1
MROH7	0	0	1
DLL1	0	0	1
ZNF25	0	1	1
PCDHB3	0	0	1
CPAMD8	0	2	1
DENND5A	0	1	1
GOLGA6C	0	1	1
ZNF468	0	0	1
DLG2	0	0	1
RADIL	0	0	1
OR2L8	0	1	1
PHACTR1	0	0	1
SFTPA1	1	2	1
SCN8A	0	0	1
RUNX2	0	1	1
HMCN2	0	1	1
MAGEB1	0	1	1
NPIPB9	0	2	1
WDR11	0	0	1
SH3TC1	0	1	1
GFPT2	0	0	1
NUP188	0	1	1
HCN3	0	0	1
DNAH7	0	1	1
FRMPD3	1	5	1
RBM10	0	0	1
CDH4	0	2	1
EXOC3	0	1	1
WDR90	0	0	1
UBTFL1	0	0	1
ZNF492	0	0	1
SEMG1	0	0	1
ADCK5	0	1	1
GJD3	0	1	1
UGT1A5	0	0	1
APOBEC3B	0	0	1
KRT9	0	1	1
BRSK2	0	2	1
COL2A1	0	0	1
DESI1	0	1	1
LRP2	0	1	1
GCC2	0	1	1
DOCK8	0	1	1
FAM221B	0	0	1
CELSR2	0	1	1
ASZ1	0	0	1
ZRANB3	0	0	1
TCEANC	0	1	1
NFXL1	0	0	1
DRGX	0	1	1
GSPT2	0	1	1
NKD2	0	1	1
FUS	0	0	1
NFKBIZ	2	5	1
CYP11B1	0	0	1
HOMER2	0	1	1
SPDYC	0	0	1
GGT1	0	0	1
P2RY14	0	0	1
OR2T34	0	1	1
ZNF626	0	0	1
KRTAP10-4	0	2	1
RBP3	0	1	1
FLG2	2	5	1
FRMPD2	0	0	1
MOB3A	0	1	1
SMC4	0	1	1
FSD1	0	1	1
RP1L1	1	3	1
PMS2	0	0	1
OR9A4	0	1	1
COL11A1	0	1	1
SUPT20HL1	1	2	1
ACR	0	0	1
RBBP8NL	0	0	1
ZYG11B	0	0	1
POTED	0	0	1
HBZ	0	1	1
KRTAP9-2	0	1	1
NBPF11	0	1	1
PRAMEF4	0	1	1
ZNF431	0	1	1
VCX	0	1	1
DLC1	0	1	1
CYP11B2	0	0	1
ELAVL4	0	1	1
ATXN3	0	2	1
ZNF347	1	2	1
FUK	0	1	1
HS6ST2	0	0	1
HS3ST3A1	0	1	1
PGK2	0	1	1
KRTAP4-7	0	2	1
CPA1	0	2	1
SLCO1C1	0	0	1
EOMES	0	0	1
PCDH11X	0	1	1
DLL3	0	1	1
COL27A1	0	0	1
RNASEL	0	1	1
DIO3	0	1	1
CDH8	0	1	1
ZNF883	0	1	1
BRCA2	0	1	1
C10orf88	0	1	1
POLR2B	0	0	1
ADAMTS1	0	1	1
TTLL2	0	0	1
GAR1	0	1	1
MIA3	0	1	1
OR4M2	0	0	1
FAM43A	0	0	1
LRP12	0	0	1
PODN	0	1	1
FAM167A	0	1	1
SMG6	0	1	1
TPP2	0	1	1
HKDC1	0	0	1
FRG2B	0	1	1
WRN	0	0	1
SEMA3E	0	1	1
ZNF57	0	1	1
CACNA1C	0	1	1
MCF2L2	0	0	1
GNAI3	0	1	1
TPCN2	0	0	1
CRAT	0	0	1
SMIM6	0	0	1
RNF220	0	1	1
DCAF4L2	0	0	1
SLC9B1	0	2	1
RNF213	0	0	1
H1FOO	0	1	1
COLEC11	0	1	1
CASKIN2	0	1	1
USP47	0	1	1
AGPAT4	0	0	1
KIAA1324L	0	0	1
RHOA	0	1	1
ANKIB1	0	1	1
SPDYE5	0	2	1
TUBB2B	0	1	1
PJA2	0	1	1
OR1L4	0	1	1
C9orf3	0	1	1
TAS1R2	0	0	1
CEP112	0	1	1
ZNF19	0	0	1
GOLGA6L4	0	1	1
HYDIN	0	1	1
SLC5A10	0	1	1
AGAP5	0	1	1
PRDM15	0	0	1
FAM86C1	0	2	1
HCAR1	0	0	1
GOLGA6L1	0	1	1
CLIP2	0	0	1
OSBPL1A	0	1	1
ADAMTS2	0	1	1
MSANTD4	0	0	1
BOD1	0	0	1
ACAN	1	2	1
GPR139	0	1	1
CDRT15L2	0	2	1
OR2T27	0	1	1
LRRK2	0	1	1
ARHGAP15	0	0	1
NOX4	0	1	1
KRTAP4-6	0	1	1
ANKRD24	0	0	1
COL22A1	0	0	1
GP2	0	1	1
HIST1H4E	0	1	1
RASGEF1C	0	1	1
CARD10	0	1	1
SPEG	0	0	1
KIAA0907	0	1	1
OR11H12	1	3	1
TULP2	0	1	1
TMEM191C	0	1	1
TMEM186	0	1	1
DMRT3	0	0	1
NLRP3	0	1	1
MORN1	0	1	1
MYH7B	0	2	1
BCL6B	0	0	1
ACRV1	0	0	1
ADCY8	0	0	1
PCMTD1	0	1	1
ZNF560	0	1	1
NHP2L1	0	0	1
HELZ2	0	1	1
WNT3	0	1	1
PRDM2	0	0	1
C19orf54	0	0	1
ZNF91	0	2	1
RANBP3L	0	1	1
HIPK2	0	0	1
NCOR2	0	0	1
AMPD1	0	1	1
PCSK1N	0	0	1
FANCD2	0	1	1
LRRIQ1	0	1	1
UBB	0	0	1
KRTAP4-12	0	0	1
CLDN4	0	1	1
DDC	0	1	1
GPR26	0	0	1
PRMT7	0	1	1
ZNF266	0	1	1
DENND4B	0	2	1
TMEM67	0	1	1
TP63	0	0	1
KLF12	0	1	1
HCAR2	0	0	1
B4GALT7	0	0	1
SLC15A2	0	0	1
AQP7	0	1	1
SCN9A	0	1	1
PARVG	0	1	1
CNTLN	0	1	1
PDGFRB	0	1	1
GMEB2	0	0	1
ROCK1	1	2	1
KCNK16	0	1	1
HSPA13	0	1	1
SIPA1	0	0	1
FOXN4	0	1	1
GNPAT	0	1	1
MEF2A	0	1	1
MICALCL	0	2	1
LRFN4	0	0	1
GRK1	0	1	1
ABCB5	0	0	1
EVPL	0	1	1
TSKU	0	0	1
PAPPA2	0	0	1
IZUMO1R	0	1	1
ALPPL2	0	1	1
TUBA3C	0	0	1
ZNF648	0	0	1
MUC2	0	1	1
NOP9	0	1	1
GRIN3B	0	1	1
ARHGAP1	0	1	1
CRNN	0	0	1
EP300	0	1	1
HRNR	0	1	1
NGRN	0	1	1
EPHB6	0	1	1
TTC16	0	1	1
SUPT16H	0	1	1
OCSTAMP	0	1	1
TATDN3	0	0	1
TBX18	0	1	1
DTX1	0	0	1
TUBB4A	0	0	1
CAPN11	0	1	1
RBM23	0	0	1
LENG9	0	0	1
CCDC87	0	1	1
CIRH1A	0	0	1
RPL14	0	1	1
SGCZ	0	1	1
LMNA	0	1	1
GAD2	0	1	1
PARP4	0	1	1
ZNF71	0	0	1
ESX1	0	2	1
CNTNAP5	0	0	1
ZMAT1	0	0	1
GRM6	0	1	1
UBC	0	0	1
CHST12	0	1	1
NLRP7	0	1	1
INSM2	0	1	1
MRPS5	0	1	1
CR2	0	0	1
SLC4A7	0	0	1
ZNF615	0	0	1
KCNN3	0	1	1
BMP15	0	0	1
MAMDC4	0	0	1
ITIH3	0	1	1
SON	0	2	1
SLC6A15	0	1	1
PKD1L2	0	2	1
SPACA1	0	0	1
TXNDC2	1	3	1
POTEH	0	2	1
WDR63	0	1	1
ZNF804A	0	1	1
PRPF40B	0	1	1
KAT6B	0	2	1
SOX1	0	1	1
CAP2	0	1	1
SLC22A8	0	0	1
POTEC	0	1	1
FAM120B	0	1	1
KIAA0040	0	1	1
POLA1	0	0	1
KRTAP15-1	0	0	1
TULP1	0	1	1
NUTM2B	0	1	1
ARX	0	0	1
POTEE	0	1	1
STX17	0	1	1
MAD1L1	0	1	1
SEMA4A	0	0	1
KCNV1	0	1	1
AGPAT9	0	1	1
FAT4	0	1	1
NLGN4Y	0	0	1
MFSD2A	0	0	1
IVL	0	0	1
PYGB	0	0	1
OR8A1	0	1	1
ZNF302	0	1	1
STT3A	0	0	1
TMC3	0	1	1
CA5A	0	1	1
MUSK	0	0	1
PIGR	0	1	1
ZNF430	0	1	1
TMEM170B	0	1	1
ICA1	0	0	1
SMARCA4	0	1	1
EXOC6	0	1	1
GOLGA6L10	0	0	1
ZNF835	0	1	1
FAAH	0	0	1
CACNA1G	0	0	1
CRYGD	0	0	1
INSC	0	1	1
C9orf64	0	0	1
AIM1L	0	2	1
TAF1L	0	0	1
DRD4	0	1	1
DNAJC24	0	1	1
ZNF721	0	1	1
GP1BA	0	0	1
SLC26A10	0	0	1
ATXN1	1	3	1
LGALS9B	0	1	1
KCNA10	0	1	1
ZXDA	0	1	1
POMZP3	0	1	1
ICAM5	0	1	1
CLEC4M	0	1	1
AMH	0	0	1
TAF15	0	1	1
PCDHGB1	0	1	1
FAM72A	0	0	1
ERLEC1	0	1	1
BMP8B	0	0	1
ANKS6	0	1	1
SYT9	0	0	1
NTNG2	0	1	1
SPATA3	0	1	1
HGFAC	0	1	1
SIK3	0	1	1
GPR161	0	1	1
TAF11	0	1	1
ABI3BP	0	1	1
TMTC1	0	1	1
SPRN	0	2	1
ITGA4	0	1	1
TRO	0	1	1
CTAGE4	0	1	1
GOLGA8R	0	1	1
PREX2	0	1	1
TASP1	0	0	1
EP400	0	1	1
SGSM1	0	1	1
HAPLN4	0	1	1
CCDC117	0	1	1
PSG4	0	1	1
UTRN	0	1	1
CCDC146	0	1	1
UBR5	0	1	1
FOXD4L4	0	2	1
SPATA31C1	1	4	1
GUCY1A3	0	0	1
TRAPPC9	0	0	1
ANKRD53	0	1	1
RASAL1	0	1	1
MAGEC2	0	1	1
FGFR4	0	0	1
WWTR1	0	1	1
PCDHGA1	0	0	1
EMG1	0	1	1
OBSL1	0	0	1
STAC2	0	0	1
NANOG	0	1	1
CHRFAM7A	0	1	1
NSFL1C	0	0	1
MKRN3	0	1	1
OR13C9	0	0	1
KRTAP9-1	0	2	1
RAPH1	0	1	1
KRT6C	0	2	1
KRT3	2	6	1
NPIPA1	0	1	1
OR2T2	0	1	1
MYH6	0	1	1
ZNF385D	0	1	1
HK1	0	1	1
CMYA5	0	1	1
ZSCAN5A	0	1	1
C20orf203	0	1	1
PHF2	1	2	1
HTT	1	3	1
PRSS3	1	2	1
ZNF705A	0	0	1
ANAPC1	0	1	1
DAB2IP	0	1	1
PDE1A	0	0	1
APOBR	2	6	1
ZNF461	0	1	1
TBP	1	2	1
SPRR3	0	1	1
KCNQ2	0	0	1
GLI3	0	0	1
FKBP5	0	1	1
SCN4A	0	0	1
TMEM14B	0	1	1
IRX3	0	1	1
NFAT5	0	1	1
NPIPA5	0	2	1
TTN	1	3	1
STK39	0	1	1
SOX21	0	1	1
ARHGEF17	0	1	1
TSNARE1	0	1	1
NRCAM	0	1	1
NRG2	1	2	1
CCDC177	0	1	1
CNRIP1	0	1	1
ATP2B3	0	1	1
EPHA10	0	0	1
SMARCA2	0	1	1
ITIH6	0	1	1
PCDHB13	0	1	1
CRB1	0	0	1
ITPR1	0	0	1
HSPBP1	0	0	1
SPEF2	0	0	1
NAA11	0	0	1
HCN4	0	1	1
COL4A4	0	0	1
JAKMIP1	0	2	1
ARHGAP35	0	0	1
RERG	0	1	1
CNOT2	0	1	1
MAN2B1	0	0	1
CYP2A6	0	1	1
PKDREJ	0	1	1
GREM1	0	1	1
PCDHA12	0	1	1
DOCK3	0	0	1
DPPA4	0	0	1
SLC4A1	0	1	1
RNF112	0	1	1
VEZT	0	1	1
NBPF14	0	2	1
NBPF6	0	0	1
SERPINA6	0	0	1
OR4S1	0	1	1
ITGB5	0	0	1
KRTAP5-4	0	1	1
NWD1	0	0	1
FGF7	0	0	1
ZNF248	0	0	1
HIST1H2AJ	0	0	1
FSIP2	0	1	1
LOXHD1	0	1	1
GALNT9	0	0	1
TCP11	0	1	1
CTSE	0	0	1
ELN	0	1	1
ST6GALNAC3	0	0	1
PRAMEF2	0	1	1
DCLK1	0	1	1
SMYD1	0	1	1
CLPTM1L	0	0	1
PHACTR4	0	1	1
MROH2B	0	1	1
CLDN14	0	0	1
SPAG16	0	0	1
CNTN5	0	0	1
MASP1	0	1	1
FAM166A	0	1	1
MAP1B	0	1	1
KRT1	0	1	1
SMOX	0	1	1
RAB11FIP3	0	0	1
CCDC60	0	1	1
METTL6	0	1	1
OR2M3	0	1	1
GABRG3	0	0	1
SH2D2A	0	1	1
COG1	0	0	1
COL26A1	0	1	1
ANKRD55	0	1	1
SPDYE6	0	1	1
CBWD1	0	2	1
HIST1H2BJ	0	1	1
AVEN	0	1	1
PCDH17	0	1	1
QRICH2	1	2	1
SPRR2B	0	1	1
MYT1	0	1	1
NBPF8	1	4	1
SLC3A2	1	3	1
FAM150B	0	1	1
ERP27	0	1	1
HDAC2	0	1	1
PLXNC1	0	0	1
GPHA2	0	1	1
CNNM2	0	0	1
TRAPPC12	0	1	1
ZNF831	0	2	1
RBM12	0	0	1
SFRP1	0	0	1
PRDM16	0	1	1
FREM1	0	1	1
CGREF1	0	2	1
PLA2G10	0	1	1
BRWD3	0	1	1
CDK11A	0	1	1
ZNF536	0	0	1
NEU2	0	1	1
LTN1	0	0	1
LPHN2	0	0	1
BCAT1	0	1	1
PCDHB4	0	1	1
CCDC37	0	1	1
COBL	0	1	1
ZNF709	0	0	1
RTN4RL1	0	0	1
TPPP	0	1	1
EPHA1	0	1	1
C11orf54	0	1	1
ZFP92	0	1	1
TENC1	0	1	1
CADM1	0	0	1
OR4D10	0	1	1
CYP19A1	0	1	1
KRT71	0	0	1
UBQLN1	0	1	1
PPRC1	0	1	1
POTEM	0	1	1
SBNO1	0	1	1
KRTAP10-8	0	1	1
CCDC15	0	0	1
CORO7	0	1	1
ADAMTS15	0	0	1
WNT5B	0	0	1
RASA4B	0	1	1
FAT2	0	0	1
RBMS1	0	1	1
ITIH2	0	1	1
FBN3	0	0	1
KCNS3	0	0	1
GOLGA8H	0	0	1
DCLRE1B	0	0	1
MUC1	0	0	1
MUC20	1	2	1
ANKRD46	0	1	1
TSHZ3	0	1	1
CNOT3	0	0	1
PLEKHM3	0	1	1
PXDNL	0	0	1
ATP4A	0	1	1
ANKK1	0	1	1
KCNMA1	0	1	1
PLAC4	0	1	1
ADAM10	0	1	1
BSN	0	1	1
INTS4	0	0	1
LOXL1	0	1	1
TROAP	0	1	1
IGF2R	0	0	1
PTX4	0	1	1
NBPF10	0	1	1
DDX11	0	2	1
PPARA	0	1	1
GPR64	0	0	1
DMBT1	0	1	1
TUBGCP6	0	0	1
LRRTM3	0	1	1
CXorf67	0	1	1
CAND2	0	0	1
CDH6	0	1	1
SHPK	0	0	1
TCEB3B	0	1	1
CCDC169	0	1	1
FDX1	0	1	1
PLEKHG4	0	1	1
ZNF343	0	0	1
CFH	0	1	1
RIN3	0	1	1
RRBP1	0	0	1
ZSCAN10	0	1	1
NUDCD2	0	0	1
FAM83F	0	0	1
FCRL5	0	1	1
IYD	0	1	1
NBPF12	0	2	1
LAMA2	0	1	1
CYP24A1	0	1	1
RUNDC3B	0	1	1
TCF23	0	1	1
KCNQ5	0	0	1
CCBL1	0	1	1
SLC12A2	0	0	1
TTC7B	0	1	1
PPL	0	2	1
GRIK3	0	0	1
MAZ	0	1	1
RASGRF2	0	1	1
ZNF518B	0	1	1
DGKK	0	2	1
PER3	0	1	1
OSBPL3	0	1	1
CALB1	0	1	1
MYH10	0	0	1
IRF5	1	3	1
GCLC	0	0	1
IP6K1	0	1	1
PSG11	0	1	1
NCOA3	0	0	1
CCER1	0	0	1
BBOX1	0	1	1
AFAP1L2	0	1	1
KIF7	0	1	1
ZNF675	0	2	1
STAT5B	0	0	1
DACH1	0	1	1
EXOC3L4	0	1	1
MYO3A	0	1	1
EIF2A	0	0	1
AMIGO1	0	1	1
CACNA1I	0	1	1
CABP4	0	1	1
BAMBI	0	1	1
GALR3	0	1	1
PLAT	0	1	1
TM4SF19	0	1	1
DCAF12L2	0	0	1
SULT2B1	0	0	1
FSHR	0	1	1
FAM170B	0	1	1
SOX2	0	1	1
PON3	0	1	1
RNF113B	0	0	1
C10orf113	0	2	1
CROT	0	0	1
ACKR4	0	1	1
WNT3A	0	1	1
PRKACA	0	0	1
RHOV	0	1	1
SCML1	0	0	1
BEND3	0	1	1
KLRB1	0	0	1
PATL2	0	1	1
OR2T29	0	1	1
HOMEZ	0	0	1
TDRD5	0	0	1
LILRA1	0	1	1
USP36	0	1	1
A1CF	0	0	1
HHIPL2	0	1	1
ANO9	0	1	1
OR8J1	0	2	1
MIR205HG	0	1	1
POU6F2	0	0	1
SLC17A7	0	0	1
GPR55	0	1	1
WDR64	0	1	1
SBSN	0	2	1
CGB8	0	0	1
KRTAP5-3	1	4	1
KIAA1279	0	0	1
WRNIP1	0	1	1
BRD9	1	2	1
NRXN1	0	1	1
PEAR1	0	1	1
NCAPD2	0	0	1
C17orf97	0	0	1
GORAB	0	1	1
WSCD2	0	0	1
LAPTM5	0	1	1
KRTAP10-7	2	5	1
SIMC1	0	1	1
CCNJL	0	1	1
BBX	0	1	1
LYZL6	0	1	1
BRI3BP	0	1	1
POU4F1	0	0	1
RSPH3	0	1	1
IFNA4	0	1	1
ACIN1	0	2	1
CACNA1E	0	0	1
TUBB8	0	1	1
HECW1	0	1	1
TXLNB	0	0	1
TECTA	0	1	1
IL27RA	0	1	1
ISM2	0	2	1
CNTNAP4	0	2	1
CDK11B	0	0	1
UBA1	0	1	1
INF2	0	1	1
CDH17	0	1	1
EIF3A	0	1	1
CLEC4A	0	0	1
SFMBT2	0	2	1
ZYG11A	0	1	1
CD163L1	0	1	1
ZNF534	0	1	1
PSEN1	0	1	1
BECN1P1	0	0	1
GPR108	0	0	1
ZNF282	0	1	1
TUBGCP3	1	3	1
OTOA	0	2	1
POLRMT	0	0	1
CP	0	1	1
GDF9	0	1	1
TGM1	0	0	1
RPS6KA2	0	0	1
RAD17	0	1	1
BCAR1	0	0	1
ZFPM2	0	1	1
SAA2	0	1	1
USP6NL	0	0	1
HIST1H4K	0	0	1
WDR87	0	1	1
SRGAP1	0	1	1
HPN	0	0	1
UBXN10	0	1	1
ABCA10	0	1	1
NOTCH2	1	2	1
SH3GLB2	0	1	1
VNN2	0	1	1
COL16A1	0	1	1
DMBX1	0	1	1
KAL1	0	2	1
OTOGL	0	1	1
PTPN11	0	1	1
IGFN1	2	6	1
AVPR1A	0	1	1
DNAH2	0	1	1
HS3ST3B1	0	1	1
KDM4B	0	1	1
SCAF8	0	1	1
PHKG1	0	1	1
DHRS12	0	1	1
ADAM28	0	1	1
LIG3	0	0	1
CNTN4	0	1	1
AMIGO3	0	1	1
CD300LG	0	0	1
OR51I2	0	0	1
DSPP	2	8	1
ZFHX3	0	0	1
LUZP4	0	1	1
MAGEB6	0	1	1
CDYL2	0	0	1
RGPD4	0	0	1
FRG1	0	1	1
TRIM64B	1	2	1
FSTL5	0	1	1
RECQL5	1	2	1
SLC13A5	0	1	1
TVP23C	0	1	1
DGKA	0	0	1
TMEM88	0	0	1
PPP2R4	0	0	1
MAPK8IP1	0	0	1
FAM205A	0	1	1
C11orf49	0	0	1
PRF1	0	1	1
ELOVL7	0	0	1
ZNF417	0	1	1
SLC6A3	0	1	1
CDHR3	0	0	1
FHL3	0	0	1
PRR20A	0	1	1
LRRC24	0	1	1
KDM6B	0	1	1
CALHM3	0	1	1
BMP2K	0	2	1
HPS5	0	1	1
CNTN1	0	2	1
AFF3	0	1	1
LOC388282	0	2	1
PHGR1	0	1	1
PNLIPRP2	0	1	1
RIMBP3B	0	1	1
DENND1B	0	1	1
SEC61A1	0	1	1
RPS9	0	0	1
OR4F17	0	1	1
TBX22	0	1	1
L3MBTL4	0	1	1
AQPEP	0	2	1
PHKA1	0	1	1
GOLGA8J	0	1	1
SUSD2	0	1	1
SLC36A4	0	1	1
OR13C2	1	2	1
OR10G2	0	2	1
MAP3K9	0	1	1
OPRM1	0	1	1
OGDHL	0	1	1
SCN3A	0	1	1
DIDO1	0	0	1
ITGAL	0	1	1
LRP1	0	0	1
MMP9	0	1	1
PALLD	0	0	1
KRTCAP3	0	1	1
LTK	0	1	1
IRX4	0	1	1
KRTAP10-10	0	1	1
ZSCAN21	0	1	1
OPRD1	0	0	1
SLC7A11	0	1	1
POTEF	0	0	1
SLC15A4	0	1	1
CCDC7	0	1	1
PIK3C2B	0	0	1
C1QTNF9	0	1	1
FAM222A	0	1	1
LRIT2	0	0	1
RSPH10B	0	1	1
DMAP1	0	1	1
ZNF154	0	1	1
MAGEE1	0	1	1
CTAGE9	0	0	1
KDM3A	0	0	1
PLIN4	1	4	1
EEF1A2	0	0	1
TRIOBP	1	4	1
KRTAP5-8	1	3	1
KRTAP5-1	0	2	1
TBPL2	0	1	1
MMP15	0	1	1
FOCAD	0	1	1
MYO10	0	1	1
KIF17	0	0	1
FAM21A	0	1	1
UTY	0	1	1
PTPLA	0	0	1
WHSC1	0	1	1
ACSM1	0	1	1
UBXN11	0	1	1
CEL	0	2	1
SIRPB1	0	1	1
PCDHA5	0	0	1
DCAF4L1	0	0	1
TRAPPC10	0	0	1
PASK	0	1	1
HERC1	0	1	1
TADA3	0	0	1
GPAT2	0	1	1
SKOR2	0	0	1
LINGO1	0	0	1
MLYCD	0	0	1
ATP13A2	0	0	1
LTBP1	0	0	1
SCRIB	0	0	1
OR4L1	0	1	1
MTERF1	0	1	1
TMPRSS9	0	0	1
NLGN2	0	0	1
TNPO2	0	1	1
LRRC74B	0	1	1
SSC5D	0	0	1
DPYD	0	1	1
ERICH6B	0	1	1
USP17L4	0	1	1
ZNF17	0	0	1
LRRN3	0	1	1
FBXO2	0	1	1
KRTAP1-1	0	0	1

## Sheet: Supplementary Table 2
Supplementary Table 2. Mutation counts between CLDN18-ARHGAP (+) and CLDN18-ARHGAP26/6 (-) group in the cohort of TCGA (N=284).
Gene Name	CLDN18-AHRGAP26/6 (+) group (N=13)	CLDN18-AHRGAP26/6 (-) group (N=271)	P value
ELF3	4	9	0.000655426
FGF13	3	6	0.0028416
LRRTM4	3	6	0.0028416
PKLR	3	6	0.0028416
TMEM200A	3	6	0.0028416
SLITRK5	5	27	0.00338657
DENND2C	2	1	0.00361604
HTATIP2	2	1	0.00361604
GPRC6A	3	7	0.00397145
CCDC135	3	9	0.00696859
ANKRD7	2	2	0.00708113
LTB4R2	2	2	0.00708113
MRGPRE	2	2	0.00708113
PLXDC1	2	2	0.00708113
SQRDL	2	2	0.00708113
STAM2	2	2	0.00708113
TRHR	2	2	0.00708113
VRK2	2	2	0.00708113
ZNF804A	4	20	0.00768093
C12orf55	3	10	0.00886254
MMP16	3	10	0.00886254
NYAP2	3	10	0.00886254
ZNF626	3	10	0.00886254
LRRN2	4	22	0.0103462
PTPRC	3	11	0.0110347
TRPC4	3	11	0.0110347
ASL	2	3	0.0115557
ATAD3C	2	3	0.0115557
CDK16	2	3	0.0115557
CSTF2	2	3	0.0115557
EXT2	2	3	0.0115557
FARP2	2	3	0.0115557
HOXD3	2	3	0.0115557
OR10G9	2	3	0.0115557
OR52L1	2	3	0.0115557
OR52N5	2	3	0.0115557
PROL1	2	3	0.0115557
WEE2	2	3	0.0115557
ZDHHC15	2	3	0.0115557
ZNF274	2	3	0.0115557
DNAH9	5	37	0.0115959
KIF2B	4	23	0.0118836
DDI1	3	12	0.0134937
ERBB2	3	12	0.0134937
CSMD1	6	56	0.0144237
ELTD1	3	13	0.0162466
KIF4B	3	13	0.0162466
AGTR2	2	4	0.0169724
CCDC13	2	4	0.0169724
CCNA1	2	4	0.0169724
FANCB	2	4	0.0169724
FMR1	2	4	0.0169724
FUNDC2	2	4	0.0169724
MAGEA10	2	4	0.0169724
MTMR10	2	4	0.0169724
OR51A7	2	4	0.0169724
OR5L2	2	4	0.0169724
PDE4B	2	4	0.0169724
RETSAT	2	4	0.0169724
TBX22	2	4	0.0169724
ZSCAN5A	2	4	0.0169724
AKAP6	3	14	0.0192991
CACNA1G	3	14	0.0192991
IGSF1	3	14	0.0192991
SLCO6A1	3	14	0.0192991
TENM1	4	28	0.0218269
GRIN2A	3	15	0.0226551
MAGEC3	3	15	0.0226551
MYH4	3	15	0.0226551
PTPRZ1	3	15	0.0226551
WRN	3	15	0.0226551
CSMD3	6	62	0.0227138
CHRND	2	5	0.0232665
CX3CL1	2	5	0.0232665
CYP4X1	2	5	0.0232665
KCNMB2	2	5	0.0232665
LOC81691	2	5	0.0232665
MAGEB18	2	5	0.0232665
MLLT3	2	5	0.0232665
NAGPA	2	5	0.0232665
RSL1D1	2	5	0.0232665
SERPINA9	2	5	0.0232665
SF3B1	2	5	0.0232665
SYT3	2	5	0.0232665
TBC1D8B	2	5	0.0232665
TNIP3	2	5	0.0232665
CNTN3	3	16	0.0263175
DLG2	3	16	0.0263175
ELMO1	3	16	0.0263175
PRRC2A	3	16	0.0263175
PTPRG	3	16	0.0263175
MAP2	4	30	0.0269396
NALCN	4	31	0.0297541
CDH20	3	17	0.0302877
GRM2	3	17	0.0302877
MLLT4	3	17	0.0302877
TLL1	3	17	0.0302877
AIFM3	2	6	0.0303765
CASC3	2	6	0.0303765
CD1D	2	6	0.0303765
GABRA4	2	6	0.0303765
GLP2R	2	6	0.0303765
GPRIN3	2	6	0.0303765
KIAA0226L	2	6	0.0303765
MYLK3	2	6	0.0303765
PRLHR	2	6	0.0303765
PSG2	2	6	0.0303765
RORB	2	6	0.0303765
SLC12A4	2	6	0.0303765
UNC45B	2	6	0.0303765
ZIC4	2	6	0.0303765
ZKSCAN2	2	6	0.0303765
CACNA1E	4	32	0.0327444
BTBD11	3	18	0.0345661
C3	3	18	0.0345661
FCRL3	3	18	0.0345661
LRRC4B	3	18	0.0345661
ALAS2	2	7	0.0382437
DLAT	2	7	0.0382437
EPB41L2	2	7	0.0382437
FAM47B	2	7	0.0382437
FAM71B	2	7	0.0382437
FAM9A	2	7	0.0382437
GUF1	2	7	0.0382437
HTR1A	2	7	0.0382437
ITIH6	2	7	0.0382437
MARK4	2	7	0.0382437
OR10AG1	2	7	0.0382437
OR10S1	2	7	0.0382437
OR2L8	2	7	0.0382437
OSBPL10	2	7	0.0382437
PAX2	2	7	0.0382437
PDZD4	2	7	0.0382437
SNTG2	2	7	0.0382437
TAS1R3	2	7	0.0382437
TNFAIP3	2	7	0.0382437
TRMT1L	2	7	0.0382437
WDR60	2	7	0.0382437
LRRIQ3	3	19	0.039152
PCDH19	3	19	0.039152
NBEA	4	35	0.0427938
FRAS1	3	20	0.0440435
GPR112	3	20	0.0440435
KLF3	3	20	0.0440435
SCN4A	3	20	0.0440435
ZNF43	3	20	0.0440435
LAMA1	4	36	0.046509
ACTRT2	2	8	0.0468117
C1S	2	8	0.0468117
C6	2	8	0.0468117
CXorf67	2	8	0.0468117
GABRA6	2	8	0.0468117
KLB	2	8	0.0468117
LRRCC1	2	8	0.0468117
MAGEE1	2	8	0.0468117
NCAPD2	2	8	0.0468117
NRCAM	2	8	0.0468117
OPRK1	2	8	0.0468117
P2RY10	2	8	0.0468117
PCM1	2	8	0.0468117
RABL6	2	8	0.0468117
RPGRIP1	2	8	0.0468117
SEZ6L	2	8	0.0468117
SLC34A2	2	8	0.0468117
RBM6	3	21	0.0492382
CNTNAP5	3	22	0.0547324
ADAM7	2	9	0.0560271
ATP13A1	2	9	0.0560271
CD163	2	9	0.0560271
DTX1	2	9	0.0560271
EVI5	2	9	0.0560271
KIAA1210	2	9	0.0560271
LCMT2	2	9	0.0560271
LIMCH1	2	9	0.0560271
NDN	2	9	0.0560271
NPFFR2	2	9	0.0560271
PHLPP2	2	9	0.0560271
SHROOM2	2	9	0.0560271
SLC8A1	2	9	0.0560271
SLC9A5	2	9	0.0560271
TECPR2	2	9	0.0560271
TRPC6	2	9	0.0560271
WWP2	2	9	0.0560271
ZFP42	2	9	0.0560271
ZNF667	2	9	0.0560271
ATP10A	3	23	0.0605219
PCDH11X	3	23	0.0605219
TRPA1	3	23	0.0605219
DNAH11	4	40	0.0632239
ARID5B	2	10	0.0658389
COIL	2	10	0.0658389
DAZAP1	2	10	0.0658389
GRIK5	2	10	0.0658389
KCNA1	2	10	0.0658389
KCNH2	2	10	0.0658389
MYO5C	2	10	0.0658389
NPC1L1	2	10	0.0658389
P2RY4	2	10	0.0658389
PCDHB10	2	10	0.0658389
PPP1R13B	2	10	0.0658389
USP21	2	10	0.0658389
ZNF341	2	10	0.0658389
ZNF492	2	10	0.0658389
PTPRD	3	24	0.0666017
SCN10A	3	24	0.0666017
SACS	4	41	0.0678675
ANGPTL4	1	1	0.0714962
ANKRD13C	1	1	0.0714962
ANKRD29	1	1	0.0714962
ANXA1	1	1	0.0714962
ARRB2	1	1	0.0714962
ATG16L1	1	1	0.0714962
ATPIF1	1	1	0.0714962
AVPR1B	1	1	0.0714962
BAK1	1	1	0.0714962
BIRC5	1	1	0.0714962
C11orf48	1	1	0.0714962
C11orf58	1	1	0.0714962
C8orf22	1	1	0.0714962
C9orf152	1	1	0.0714962
CALM1	1	1	0.0714962
CALN1	1	1	0.0714962
CBR1	1	1	0.0714962
CD164	1	1	0.0714962
CD36	1	1	0.0714962
CEP89	1	1	0.0714962
CFLAR	1	1	0.0714962
CHKA	1	1	0.0714962
CHN1	1	1	0.0714962
CIDEB	1	1	0.0714962
CLEC2B	1	1	0.0714962
CLPSL1	1	1	0.0714962
CRYL1	1	1	0.0714962
CSH2	1	1	0.0714962
CST8	1	1	0.0714962
CST9L	1	1	0.0714962
CUEDC2	1	1	0.0714962
CXADR	1	1	0.0714962
CYP4A11	1	1	0.0714962
DBF4B	1	1	0.0714962
DCP1A	1	1	0.0714962
DEF6	1	1	0.0714962
DFNB59	1	1	0.0714962
DHCR24	1	1	0.0714962
DNASE2	1	1	0.0714962
DNASE2B	1	1	0.0714962
DNLZ	1	1	0.0714962
DPCD	1	1	0.0714962
DPRX	1	1	0.0714962
DRGX	1	1	0.0714962
ECHDC2	1	1	0.0714962
EFNA1	1	1	0.0714962
EIF4E2	1	1	0.0714962
ENSG00000269808	1	1	0.0714962
ERMAP	1	1	0.0714962
FAM104A	1	1	0.0714962
FAM216A	1	1	0.0714962
FATE1	1	1	0.0714962
FBXW2	1	1	0.0714962
FCHSD1	1	1	0.0714962
FOLR4	1	1	0.0714962
FOXA1	1	1	0.0714962
GSTA2	1	1	0.0714962
HBG2	1	1	0.0714962
HEYL	1	1	0.0714962
HSPB1	1	1	0.0714962
IGBP1	1	1	0.0714962
IL15RA	1	1	0.0714962
INO80C	1	1	0.0714962
ITM2C	1	1	0.0714962
KCNRG	1	1	0.0714962
KDELR3	1	1	0.0714962
KRT7	1	1	0.0714962
KRTAP19-7	1	1	0.0714962
KRTAP4-7	1	1	0.0714962
KRTAP5-2	1	1	0.0714962
LAGE3	1	1	0.0714962
LDLRAD2	1	1	0.0714962
LSM11	1	1	0.0714962
METRN	1	1	0.0714962
MGAT2	1	1	0.0714962
MRO	1	1	0.0714962
MRPL51	1	1	0.0714962
MSANTD1	1	1	0.0714962
MTFP1	1	1	0.0714962
N6AMT1	1	1	0.0714962
NMNAT1	1	1	0.0714962
NMRK2	1	1	0.0714962
ODC1	1	1	0.0714962
OR2T29	1	1	0.0714962
OR52A1	1	1	0.0714962
OSCP1	1	1	0.0714962
OSR1	1	1	0.0714962
PHF6	1	1	0.0714962
PLA2G12B	1	1	0.0714962
POLR2E	1	1	0.0714962
POLR3G	1	1	0.0714962
PRSS1	1	1	0.0714962
PSMG2	1	1	0.0714962
PSTK	1	1	0.0714962
PTGDR2	1	1	0.0714962
PURA	1	1	0.0714962
RAB26	1	1	0.0714962
RAB4A	1	1	0.0714962
RAB6B	1	1	0.0714962
RHBDL2	1	1	0.0714962
RND1	1	1	0.0714962
RNF185	1	1	0.0714962
RPL31	1	1	0.0714962
SGCZ	1	1	0.0714962
SH3BGR	1	1	0.0714962
SH3BGRL2	1	1	0.0714962
SHF	1	1	0.0714962
SKAP2	1	1	0.0714962
SLC2A11	1	1	0.0714962
SLC2A4RG	1	1	0.0714962
SLC7A7	1	1	0.0714962
SMAD5	1	1	0.0714962
SNHG14	1	1	0.0714962
SPATA31A7	1	1	0.0714962
TGFB1	1	1	0.0714962
TMEM144	1	1	0.0714962
TNNC1	1	1	0.0714962
TOMM70A	1	1	0.0714962
TSEN34	1	1	0.0714962
TSR2	1	1	0.0714962
TTLL6	1	1	0.0714962
UBE2G2	1	1	0.0714962
UEVLD	1	1	0.0714962
ZCCHC9	1	1	0.0714962
ZDHHC9	1	1	0.0714962
ZMAT5	1	1	0.0714962
ZNF260	1	1	0.0714962
ZNF346	1	1	0.0714962
ZNF503	1	1	0.0714962
ZNF565	1	1	0.0714962
ZNF850	1	1	0.0714962
DCHS2	3	25	0.0729662
ARMC4	2	11	0.0761982
CECR2	2	11	0.0761982
CLEC16A	2	11	0.0761982
GFOD1	2	11	0.0761982
IRF2	2	11	0.0761982
MGAT4C	2	11	0.0761982
NELL2	2	11	0.0761982
PHIP	2	11	0.0761982
PLCB4	2	11	0.0761982
SLC6A15	2	11	0.0761982
TBC1D32	2	11	0.0761982
TMC4	2	11	0.0761982
ZFP36L2	2	11	0.0761982
SRCAP	3	26	0.079609
TMEM132D	3	26	0.079609
VCAN	3	26	0.079609
PEG3	3	27	0.0865234
AMER1	2	12	0.0870588
ATG2A	2	12	0.0870588
C10orf68	2	12	0.0870588
CEP128	2	12	0.0870588
FGD3	2	12	0.0870588
GPC6	2	12	0.0870588
JUP	2	12	0.0870588
KAL1	2	12	0.0870588
LATS1	2	12	0.0870588
LPHN2	2	12	0.0870588
MAG	2	12	0.0870588
MON2	2	12	0.0870588
SNRK	2	12	0.0870588
STXBP5L	2	12	0.0870588
TESPA1	2	12	0.0870588
UACA	2	12	0.0870588
ABCA4	2	13	0.0983765
ALPK1	2	13	0.0983765
CHL1	2	13	0.0983765
CPXM2	2	13	0.0983765
CUL7	2	13	0.0983765
DNA2	2	13	0.0983765
FHOD1	2	13	0.0983765
FRMPD2	2	13	0.0983765
IBTK	2	13	0.0983765
KCNH1	2	13	0.0983765
KDM6B	2	13	0.0983765
KIF13B	2	13	0.0983765
LPA	2	13	0.0983765
NEURL4	2	13	0.0983765
NLRP12	2	13	0.0983765
SF3B2	2	13	0.0983765
SLC9A4	2	13	0.0983765
SLTM	2	13	0.0983765
TENC1	2	13	0.0983765
UNC5C	2	13	0.0983765
UNC5D	2	13	0.0983765
WASF3	2	13	0.0983765
ZNF716	2	13	0.0983765
ABHD16B	1	2	0.105436
ACKR3	1	2	0.105436
ADAM15	1	2	0.105436
ADORA3	1	2	0.105436
AGR3	1	2	0.105436
AKR1C1	1	2	0.105436
AKR1C3	1	2	0.105436
AKT1	1	2	0.105436
AP1M2	1	2	0.105436
ARL8A	1	2	0.105436
ATF4	1	2	0.105436
AURKA	1	2	0.105436
B3GNT3	1	2	0.105436
BBS1	1	2	0.105436
BCS1L	1	2	0.105436
BHMT2	1	2	0.105436
BTBD8	1	2	0.105436
BTN3A3	1	2	0.105436
C11orf70	1	2	0.105436
C17orf59	1	2	0.105436
C1QTNF3	1	2	0.105436
C1orf174	1	2	0.105436
C2orf70	1	2	0.105436
C9orf117	1	2	0.105436
C9orf156	1	2	0.105436
C9orf50	1	2	0.105436
CALB1	1	2	0.105436
CCDC172	1	2	0.105436
CDK2	1	2	0.105436
CDX2	1	2	0.105436
CEP44	1	2	0.105436
CERS5	1	2	0.105436
CES3	1	2	0.105436
CLIC4	1	2	0.105436
CLMP	1	2	0.105436
CLN8	1	2	0.105436
CLUL1	1	2	0.105436
CNOT11	1	2	0.105436
COLEC10	1	2	0.105436
CRYBB2	1	2	0.105436
CUEDC1	1	2	0.105436
DBNDD1	1	2	0.105436
DENND1B	1	2	0.105436
DNAJC15	1	2	0.105436
DNAJC28	1	2	0.105436
DNTT	1	2	0.105436
DRD1	1	2	0.105436
DUXA	1	2	0.105436
ELL3	1	2	0.105436
EME1	1	2	0.105436
ENSG00000212884	1	2	0.105436
ETV3L	1	2	0.105436
EXOSC1	1	2	0.105436
FAM3B	1	2	0.105436
FAM86B1	1	2	0.105436
FBP1	1	2	0.105436
FBXO7	1	2	0.105436
FEV	1	2	0.105436
FGFBP1	1	2	0.105436
FOXR2	1	2	0.105436
FRMD4B	1	2	0.105436
FTO	1	2	0.105436
FUT11	1	2	0.105436
GBP2	1	2	0.105436
GDPD2	1	2	0.105436
GH2	1	2	0.105436
GNB4	1	2	0.105436
GPIHBP1	1	2	0.105436
GPR68	1	2	0.105436
GPS2	1	2	0.105436
HBD	1	2	0.105436
HIST1H1D	1	2	0.105436
HIST1H2BK	1	2	0.105436
HS3ST6	1	2	0.105436
HSD17B12	1	2	0.105436
IGF2	1	2	0.105436
INTS9	1	2	0.105436
IQCF2	1	2	0.105436
IRAK4	1	2	0.105436
ISOC2	1	2	0.105436
KANK3	1	2	0.105436
KCNE1L	1	2	0.105436
KCNE4	1	2	0.105436
KCNK7	1	2	0.105436
KHDRBS3	1	2	0.105436
KLF5	1	2	0.105436
KLHDC3	1	2	0.105436
KRTAP21-2	1	2	0.105436
LCN6	1	2	0.105436
LGALS8	1	2	0.105436
LHPP	1	2	0.105436
LIM2	1	2	0.105436
LIMA1	1	2	0.105436
LIMK1	1	2	0.105436
LRIT3	1	2	0.105436
LRP5L	1	2	0.105436
LRRC63	1	2	0.105436
LY6D	1	2	0.105436
LY9	1	2	0.105436
MDFI	1	2	0.105436
MGST2	1	2	0.105436
MOSPD2	1	2	0.105436
MRPL28	1	2	0.105436
NCR1	1	2	0.105436
NDUFS6	1	2	0.105436
NEIL2	1	2	0.105436
NHLRC3	1	2	0.105436
NIPSNAP3B	1	2	0.105436
NKAIN2	1	2	0.105436
NMNAT3	1	2	0.105436
NPLOC4	1	2	0.105436
OC90	1	2	0.105436
OR12D2	1	2	0.105436
OR13C2	1	2	0.105436
OR2A25	1	2	0.105436
OR4D10	1	2	0.105436
OR5B21	1	2	0.105436
OR5K1	1	2	0.105436
OR6C4	1	2	0.105436
OR8G5	1	2	0.105436
OR8K3	1	2	0.105436
OR8S1	1	2	0.105436
ORC5	1	2	0.105436
OSGEPL1	1	2	0.105436
OTUD5	1	2	0.105436
PACSIN3	1	2	0.105436
PAPD5	1	2	0.105436
PCGF5	1	2	0.105436
PGAM5	1	2	0.105436
PLEKHG6	1	2	0.105436
PNPLA3	1	2	0.105436
PPA1	1	2	0.105436
PPEF1	1	2	0.105436
PPIL1	1	2	0.105436
PPP1R14A	1	2	0.105436
PRAMEF11	1	2	0.105436
PRELP	1	2	0.105436
PRRC1	1	2	0.105436
PYCR1	1	2	0.105436
QDPR	1	2	0.105436
RAB33A	1	2	0.105436
RASL11A	1	2	0.105436
RASSF5	1	2	0.105436
RBM23	1	2	0.105436
RC3H1	1	2	0.105436
RGS14	1	2	0.105436
RNASE2	1	2	0.105436
RNFT2	1	2	0.105436
RPAP2	1	2	0.105436
RSU1	1	2	0.105436
SAAL1	1	2	0.105436
SCN3B	1	2	0.105436
SH3GL2	1	2	0.105436
SIX1	1	2	0.105436
SKA3	1	2	0.105436
SLC25A33	1	2	0.105436
SLC25A5	1	2	0.105436
SLC35F4	1	2	0.105436
SLC41A1	1	2	0.105436
SMG9	1	2	0.105436
SNX2	1	2	0.105436
SOAT2	1	2	0.105436
SPACA1	1	2	0.105436
SPANXN1	1	2	0.105436
SPRR4	1	2	0.105436
SRC	1	2	0.105436
STARD4	1	2	0.105436
STK35	1	2	0.105436
STK39	1	2	0.105436
SULT1C4	1	2	0.105436
TAF6L	1	2	0.105436
TEKT1	1	2	0.105436
TEX101	1	2	0.105436
TEX264	1	2	0.105436
TFAP2E	1	2	0.105436
TFPT	1	2	0.105436
TMEM176B	1	2	0.105436
TMEM182	1	2	0.105436
TMEM201	1	2	0.105436
TMEM26	1	2	0.105436
TMEM39B	1	2	0.105436
TNFSF13	1	2	0.105436
TPSAB1	1	2	0.105436
TRAPPC13	1	2	0.105436
TSNAX	1	2	0.105436
TSPAN32	1	2	0.105436
TTC1	1	2	0.105436
TUBGCP5	1	2	0.105436
UBC	1	2	0.105436
UBE2J2	1	2	0.105436
VDAC1	1	2	0.105436
WDR82	1	2	0.105436
XRCC4	1	2	0.105436
ZFX	1	2	0.105436
ZKSCAN8	1	2	0.105436
ZNF155	1	2	0.105436
ZNF177	1	2	0.105436
ZNF259	1	2	0.105436
ZNF302	1	2	0.105436
ZNF350	1	2	0.105436
ZNF385A	1	2	0.105436
ZNF404	1	2	0.105436
ZNF563	1	2	0.105436
ZNF621	1	2	0.105436
ZNF674	1	2	0.105436
ZNHIT1	1	2	0.105436
ZWILCH	1	2	0.105436
ABCA13	3	30	0.108821
KRT75	3	30	0.108821
ADAMTS9	2	14	0.110109
AMPD3	2	14	0.110109
ATP1A3	2	14	0.110109
ATRNL1	2	14	0.110109
BRD1	2	14	0.110109
EGFLAM	2	14	0.110109
EXO1	2	14	0.110109
FPGT-TNNI3K	2	14	0.110109
FREM1	2	14	0.110109
MAN2B2	2	14	0.110109
MSR1	2	14	0.110109
PCDH9	2	14	0.110109
PDS5A	2	14	0.110109
PGR	2	14	0.110109
POLR3A	2	14	0.110109
PPL	2	14	0.110109
PRICKLE2	2	14	0.110109
SATB1	2	14	0.110109
TRPM2	2	14	0.110109
UNC13B	2	14	0.110109
XPOT	2	14	0.110109
HMCN1	4	49	0.111582
FAM212A	3	31	0.116745
PDZD2	3	31	0.116745
ARHGEF40	2	15	0.122217
ATP10D	2	15	0.122217
BBS9	2	15	0.122217
CASP8	2	15	0.122217
CELF4	2	15	0.122217
COL4A4	2	15	0.122217
CPEB2	2	15	0.122217
EYA4	2	15	0.122217
F5	2	15	0.122217
LAMB4	2	15	0.122217
MYO1F	2	15	0.122217
POTEC	2	15	0.122217
PSD3	2	15	0.122217
PTCH1	2	15	0.122217
RUSC2	2	15	0.122217
PIK3CA	4	51	0.124266
CMYA5	3	32	0.124901
TG	3	32	0.124901
GANAB	2	16	0.134663
MED13L	2	16	0.134663
NRK	2	16	0.134663
PCDHA13	2	16	0.134663
PCDHB3	2	16	0.134663
SERPINB10	2	16	0.134663
SF3B3	2	16	0.134663
SGK223	2	16	0.134663
SMG1	2	16	0.134663
TAF1	2	16	0.134663
ZNF99	2	16	0.134663
ZNFX1	2	16	0.134663
DNAH5	4	53	0.137609
ABAT	1	3	0.138221
ABHD6	1	3	0.138221
ACTR1B	1	3	0.138221
ADCK4	1	3	0.138221
AGPAT5	1	3	0.138221
AHSG	1	3	0.138221
ALDH9A1	1	3	0.138221
ALKBH4	1	3	0.138221
ANAPC7	1	3	0.138221
ARMC12	1	3	0.138221
BAIAP2	1	3	0.138221
BDH1	1	3	0.138221
BROX	1	3	0.138221
C19orf54	1	3	0.138221
C6orf62	1	3	0.138221
C8A	1	3	0.138221
CAPN9	1	3	0.138221
CCDC157	1	3	0.138221
CCT6B	1	3	0.138221
CDK5R1	1	3	0.138221
CDR1	1	3	0.138221
CDR2	1	3	0.138221
CENPI	1	3	0.138221
CHML	1	3	0.138221
CITED1	1	3	0.138221
CNOT10	1	3	0.138221
CPO	1	3	0.138221
CRISP1	1	3	0.138221
CRYGB	1	3	0.138221
CUL4A	1	3	0.138221
CWC27	1	3	0.138221
CXorf36	1	3	0.138221
CYP4A22	1	3	0.138221
CYP4F12	1	3	0.138221
DAP3	1	3	0.138221
DHODH	1	3	0.138221
DNASE1L1	1	3	0.138221
DSPP	1	3	0.138221
DUSP26	1	3	0.138221
E2F2	1	3	0.138221
EAPP	1	3	0.138221
EDN1	1	3	0.138221
EHF	1	3	0.138221
ENPP7	1	3	0.138221
EPC1	1	3	0.138221
FAM159A	1	3	0.138221
FAM169B	1	3	0.138221
FAM175A	1	3	0.138221
FBP2	1	3	0.138221
FBXW5	1	3	0.138221
FCGR2A	1	3	0.138221
GBX1	1	3	0.138221
GIMAP6	1	3	0.138221
GLRX3	1	3	0.138221
GNPDA1	1	3	0.138221
GP6	1	3	0.138221
GPR153	1	3	0.138221
GPR157	1	3	0.138221
GSG2	1	3	0.138221
H2BFWT	1	3	0.138221
HARS2	1	3	0.138221
HCRT	1	3	0.138221
HIF1A	1	3	0.138221
HIST1H2BJ	1	3	0.138221
HMX3	1	3	0.138221
HNRNPDL	1	3	0.138221
HOXD1	1	3	0.138221
HPS1	1	3	0.138221
HSPA14	1	3	0.138221
HSPA1A	1	3	0.138221
HTATSF1	1	3	0.138221
HTR1D	1	3	0.138221
IFNA16	1	3	0.138221
IL10RA	1	3	0.138221
IMP4	1	3	0.138221
IRF1	1	3	0.138221
ITGB6	1	3	0.138221
JAZF1	1	3	0.138221
KCNJ8	1	3	0.138221
LAMP3	1	3	0.138221
LCAT	1	3	0.138221
LCP1	1	3	0.138221
LDLRAD3	1	3	0.138221
LHX8	1	3	0.138221
LILRB2	1	3	0.138221
LIPH	1	3	0.138221
LMNB1	1	3	0.138221
LMO2	1	3	0.138221
LONRF2	1	3	0.138221
LRCH3	1	3	0.138221
LRIF1	1	3	0.138221
LRRC59	1	3	0.138221
LYPLA2	1	3	0.138221
MAGEA3	1	3	0.138221
MAP4K3	1	3	0.138221
MAPKAPK5	1	3	0.138221
MBNL1	1	3	0.138221
MC4R	1	3	0.138221
MC5R	1	3	0.138221
MDM4	1	3	0.138221
MEIS3	1	3	0.138221
METTL21A	1	3	0.138221
MIEF2	1	3	0.138221
MRPL24	1	3	0.138221
MS4A12	1	3	0.138221
MSANTD3	1	3	0.138221
MSMO1	1	3	0.138221
MTNR1A	1	3	0.138221
MUM1	1	3	0.138221
NAT6	1	3	0.138221
NOL9	1	3	0.138221
NR4A3	1	3	0.138221
NSMCE2	1	3	0.138221
NUDCD1	1	3	0.138221
OR10T2	1	3	0.138221
OR13J1	1	3	0.138221
OR2B2	1	3	0.138221
OR2L13	1	3	0.138221
OR3A1	1	3	0.138221
OR4K17	1	3	0.138221
OR52B4	1	3	0.138221
OR56A4	1	3	0.138221
ORM1	1	3	0.138221
OS9	1	3	0.138221
P2RX1	1	3	0.138221
P2RY14	1	3	0.138221
PARP9	1	3	0.138221
PDE6A	1	3	0.138221
PGK1	1	3	0.138221
PGLYRP1	1	3	0.138221
PGM1	1	3	0.138221
PI4K2A	1	3	0.138221
PLA2G4D	1	3	0.138221
POLD2	1	3	0.138221
POLR1D	1	3	0.138221
POMK	1	3	0.138221
POMT2	1	3	0.138221
POMZP3	1	3	0.138221
PPARG	1	3	0.138221
PPP1R11	1	3	0.138221
PPP1R15A	1	3	0.138221
PRDM11	1	3	0.138221
PRDM15	1	3	0.138221
PROCA1	1	3	0.138221
PROCR	1	3	0.138221
PRR3	1	3	0.138221
QARS	1	3	0.138221
RANBP3L	1	3	0.138221
RFXANK	1	3	0.138221
RGS17	1	3	0.138221
RGS19	1	3	0.138221
RHD	1	3	0.138221
RIT2	1	3	0.138221
RNF39	1	3	0.138221
RNF44	1	3	0.138221
RPL13A	1	3	0.138221
RPL9	1	3	0.138221
RPRM	1	3	0.138221
RPS20	1	3	0.138221
RRP9	1	3	0.138221
RSPO3	1	3	0.138221
SAMD8	1	3	0.138221
SERPINB6	1	3	0.138221
SERPIND1	1	3	0.138221
SETD6	1	3	0.138221
SF3B4	1	3	0.138221
SH2B2	1	3	0.138221
SH2D3A	1	3	0.138221
SH3BGRL3	1	3	0.138221
SIMC1	1	3	0.138221
SLC26A2	1	3	0.138221
SLC27A1	1	3	0.138221
SLC28A2	1	3	0.138221
SLC44A1	1	3	0.138221
SNIP1	1	3	0.138221
SOCS5	1	3	0.138221
SP7	1	3	0.138221
SPDEF	1	3	0.138221
SPESP1	1	3	0.138221
SPOCK3	1	3	0.138221
SPON2	1	3	0.138221
SPRED3	1	3	0.138221
STK25	1	3	0.138221
STX1B	1	3	0.138221
STXBP4	1	3	0.138221
TADA2A	1	3	0.138221
TAGAP	1	3	0.138221
TAS2R4	1	3	0.138221
TBC1D15	1	3	0.138221
TBCCD1	1	3	0.138221
TBL2	1	3	0.138221
TBX6	1	3	0.138221
TEFM	1	3	0.138221
TMEM183A	1	3	0.138221
TMEM47	1	3	0.138221
TMEM52B	1	3	0.138221
TOR1AIP1	1	3	0.138221
TRAF3IP2	1	3	0.138221
TRIM58	1	3	0.138221
TRMT10C	1	3	0.138221
TSPAN15	1	3	0.138221
TTC39B	1	3	0.138221
TTLL11	1	3	0.138221
UBE2F	1	3	0.138221
UBIAD1	1	3	0.138221
UBXN7	1	3	0.138221
UGT1A7	1	3	0.138221
USE1	1	3	0.138221
VSIG4	1	3	0.138221
YEATS2	1	3	0.138221
ZCCHC16	1	3	0.138221
ZDHHC21	1	3	0.138221
ZFP36L1	1	3	0.138221
ZNF136	1	3	0.138221
ZNF182	1	3	0.138221
ZNF200	1	3	0.138221
ZNF32	1	3	0.138221
ZNF337	1	3	0.138221
ZNF396	1	3	0.138221
ZNF497	1	3	0.138221
ZNF649	1	3	0.138221
ZNF696	1	3	0.138221
DMXL2	3	34	0.14187
MACF1	3	34	0.14187
SYNE2	3	34	0.14187
IPO5	2	17	0.147409
KIF26B	2	17	0.147409
LRRIQ1	2	17	0.147409
NUP214	2	17	0.147409
TAOK2	2	17	0.147409
ERBB4	3	35	0.150665
BRD8	3	36	0.159654
GLI3	3	36	0.159654
RNF43	3	36	0.159654
ANKRD30A	2	18	0.160423
ARID4A	2	18	0.160423
ATAD2	2	18	0.160423
CTNNB1	2	18	0.160423
CTNND1	2	18	0.160423
GRIA2	2	18	0.160423
NLRP9	2	18	0.160423
PBRM1	2	18	0.160423
PCDHA3	2	18	0.160423
SEMA6D	2	18	0.160423
SOGA3	2	18	0.160423
SPTBN5	2	18	0.160423
THSD1	2	18	0.160423
TRPM6	2	18	0.160423
TSHZ2	2	18	0.160423
RNF213	3	37	0.168828
ABCG2	1	4	0.169888
ACMSD	1	4	0.169888
ADAM32	1	4	0.169888
ADAT1	1	4	0.169888
ADIPOR2	1	4	0.169888
AGGF1	1	4	0.169888
AHCYL1	1	4	0.169888
AKR1B1	1	4	0.169888
ALDH3A2	1	4	0.169888
ALOXE3	1	4	0.169888
AMACR	1	4	0.169888
ANGEL1	1	4	0.169888
ANKK1	1	4	0.169888
ANKRD55	1	4	0.169888
API5	1	4	0.169888
APOA1BP	1	4	0.169888
ARHGAP15	1	4	0.169888
ARSI	1	4	0.169888
ATP6V0A2	1	4	0.169888
C15orf26	1	4	0.169888
C2orf69	1	4	0.169888
C9orf43	1	4	0.169888
CACNG3	1	4	0.169888
CAPN13	1	4	0.169888
CBLN3	1	4	0.169888
CCDC87	1	4	0.169888
CCNT1	1	4	0.169888
CD207	1	4	0.169888
CD209	1	4	0.169888
CEACAM8	1	4	0.169888
CENPO	1	4	0.169888
CEP57L1	1	4	0.169888
CHST12	1	4	0.169888
COG3	1	4	0.169888
COQ3	1	4	0.169888
CORO2A	1	4	0.169888
CPEB1	1	4	0.169888
CPT1B	1	4	0.169888
CREM	1	4	0.169888
CRY2	1	4	0.169888
CTBP1	1	4	0.169888
CXXC4	1	4	0.169888
CXorf57	1	4	0.169888
CYP7A1	1	4	0.169888
DAZAP2	1	4	0.169888
DBH	1	4	0.169888
DKK2	1	4	0.169888
DNAJC10	1	4	0.169888
DPPA2	1	4	0.169888
EFEMP1	1	4	0.169888
EFNB1	1	4	0.169888
EGR4	1	4	0.169888
EHD3	1	4	0.169888
ENTPD2	1	4	0.169888
FAAH2	1	4	0.169888
FAM117B	1	4	0.169888
FBLN7	1	4	0.169888
FBXW12	1	4	0.169888
FCHO1	1	4	0.169888
FCRL6	1	4	0.169888
FGF9	1	4	0.169888
FLOT2	1	4	0.169888
FPGT	1	4	0.169888
FUT10	1	4	0.169888
GABRG1	1	4	0.169888
GCG	1	4	0.169888
GFRA2	1	4	0.169888
GGTLC1	1	4	0.169888
GK5	1	4	0.169888
GPR126	1	4	0.169888
GPR17	1	4	0.169888
GPR20	1	4	0.169888
GRPR	1	4	0.169888
GSTCD	1	4	0.169888
GTPBP4	1	4	0.169888
HELT	1	4	0.169888
HRG	1	4	0.169888
IMMP2L	1	4	0.169888
IQCE	1	4	0.169888
IRF5	1	4	0.169888
ITGB1BP2	1	4	0.169888
ITGB7	1	4	0.169888
ITPRIP	1	4	0.169888
KCNIP3	1	4	0.169888
KIAA0391	1	4	0.169888
KLC1	1	4	0.169888
KLHL25	1	4	0.169888
KPNA5	1	4	0.169888
KRR1	1	4	0.169888
KRT81	1	4	0.169888
KRTAP9-3	1	4	0.169888
L3MBTL4	1	4	0.169888
LILRA1	1	4	0.169888
LIMS2	1	4	0.169888
LINGO1	1	4	0.169888
LIPI	1	4	0.169888
LNP1	1	4	0.169888
LOH12CR1	1	4	0.169888
LRRC30	1	4	0.169888
LRRC48	1	4	0.169888
MAP7	1	4	0.169888
MAPK7	1	4	0.169888
MARCH7	1	4	0.169888
MCM3	1	4	0.169888
MGRN1	1	4	0.169888
MITD1	1	4	0.169888
MKX	1	4	0.169888
MLC1	1	4	0.169888
MNT	1	4	0.169888
MPO	1	4	0.169888
NAB1	1	4	0.169888
NAT2	1	4	0.169888
NECAB1	1	4	0.169888
NEU3	1	4	0.169888
NF2	1	4	0.169888
NKAP	1	4	0.169888
NKRF	1	4	0.169888
NPNT	1	4	0.169888
NUB1	1	4	0.169888
OAF	1	4	0.169888
OGT	1	4	0.169888
OR10R2	1	4	0.169888
OR11A1	1	4	0.169888
OR14A16	1	4	0.169888
OR2T34	1	4	0.169888
OR4D5	1	4	0.169888
OR4L1	1	4	0.169888
OR5AS1	1	4	0.169888
OR5H14	1	4	0.169888
OR5M11	1	4	0.169888
OR8B8	1	4	0.169888
ORC6	1	4	0.169888
OTOP2	1	4	0.169888
OXSM	1	4	0.169888
PALM2	1	4	0.169888
PCYT1B	1	4	0.169888
PDCD4	1	4	0.169888
PDE7A	1	4	0.169888
PDLIM7	1	4	0.169888
PFKFB2	1	4	0.169888
PGS1	1	4	0.169888
PHYKPL	1	4	0.169888
PIWIL3	1	4	0.169888
PLCD1	1	4	0.169888
POLR3E	1	4	0.169888
POTEH	1	4	0.169888
PRB3	1	4	0.169888
PRR14L	1	4	0.169888
PSAPL1	1	4	0.169888
PSMC2	1	4	0.169888
R3HCC1L	1	4	0.169888
RAB3IP	1	4	0.169888
RABGGTA	1	4	0.169888
RAD21	1	4	0.169888
RAG2	1	4	0.169888
RALGPS1	1	4	0.169888
RALY	1	4	0.169888
RBM18	1	4	0.169888
REL	1	4	0.169888
RIPK3	1	4	0.169888
RNF148	1	4	0.169888
RNF150	1	4	0.169888
RNF219	1	4	0.169888
RPS6KB1	1	4	0.169888
RRAGB	1	4	0.169888
RRM1	1	4	0.169888
RSPH1	1	4	0.169888
SCEL	1	4	0.169888
SEC14L4	1	4	0.169888
SEC24D	1	4	0.169888
SH3D19	1	4	0.169888
SLC15A3	1	4	0.169888
SLC15A4	1	4	0.169888
SLC16A1	1	4	0.169888
SLC16A12	1	4	0.169888
SLC25A26	1	4	0.169888
SLC25A37	1	4	0.169888
SLC26A6	1	4	0.169888
SLC35A4	1	4	0.169888
SLC52A1	1	4	0.169888
SLC9B2	1	4	0.169888
SMEK1	1	4	0.169888
SNAP91	1	4	0.169888
SNRPA1	1	4	0.169888
SPANXN2	1	4	0.169888
SPATA16	1	4	0.169888
SPATA5	1	4	0.169888
SPATA5L1	1	4	0.169888
SRSF5	1	4	0.169888
SSRP1	1	4	0.169888
ST6GALNAC6	1	4	0.169888
STAG3	1	4	0.169888
STIP1	1	4	0.169888
SUN5	1	4	0.169888
SUSD5	1	4	0.169888
SUV39H1	1	4	0.169888
SYCP3	1	4	0.169888
SYN3	1	4	0.169888
SYNDIG1	1	4	0.169888
TACC3	1	4	0.169888
TBXAS1	1	4	0.169888
TCN1	1	4	0.169888
TEKT3	1	4	0.169888
TEKT5	1	4	0.169888
TFEC	1	4	0.169888
TGIF2LX	1	4	0.169888
TH	1	4	0.169888
TIGD7	1	4	0.169888
TLE6	1	4	0.169888
TM9SF2	1	4	0.169888
TMEM125	1	4	0.169888
TMEM171	1	4	0.169888
TMEM87A	1	4	0.169888
TRIM27	1	4	0.169888
TSC1	1	4	0.169888
TSSK6	1	4	0.169888
TUBAL3	1	4	0.169888
UBA7	1	4	0.169888
UBAC1	1	4	0.169888
UBQLNL	1	4	0.169888
UGT2B17	1	4	0.169888
UXS1	1	4	0.169888
VGF	1	4	0.169888
WDR20	1	4	0.169888
ZBTB7B	1	4	0.169888
ZCCHC5	1	4	0.169888
ZNF281	1	4	0.169888
ZNF384	1	4	0.169888
ZNF426	1	4	0.169888
ZNF524	1	4	0.169888
ZNF526	1	4	0.169888
ZNF620	1	4	0.169888
ZNF83	1	4	0.169888
ZSCAN29	1	4	0.169888
TTN	9	161	0.170013
ARID2	2	19	0.173671
ATP9B	2	19	0.173671
FLNA	2	19	0.173671
GRIK2	2	19	0.173671
HIVEP2	2	19	0.173671
MAGEC1	2	19	0.173671
PCDHGA12	2	19	0.173671
PRDM9	2	19	0.173671
TLR4	2	19	0.173671
TPO	2	19	0.173671
EPG5	2	20	0.187123
GRID1	2	20	0.187123
HLA-B	2	20	0.187123
NCOR2	2	20	0.187123
PAPPA	2	20	0.187123
SPHKAP	2	20	0.187123
TEX15	2	20	0.187123
VPS13D	2	20	0.187123
ARID1A	5	78	0.192924
PREX2	3	40	0.19736
AAK1	1	5	0.200471
ACAT1	1	5	0.200471
ADAM17	1	5	0.200471
ADAM29	1	5	0.200471
AGPAT4	1	5	0.200471
ALDH8A1	1	5	0.200471
ALDOC	1	5	0.200471
AMHR2	1	5	0.200471
ANKEF1	1	5	0.200471
ARHGAP26	1	5	0.200471
ARHGEF37	1	5	0.200471
ASCL4	1	5	0.200471
ATOH1	1	5	0.200471
ATP6AP1	1	5	0.200471
ATP6AP2	1	5	0.200471
ATP6V0A1	1	5	0.200471
B9D2	1	5	0.200471
BACE1	1	5	0.200471
BEND4	1	5	0.200471
BIRC8	1	5	0.200471
BSG	1	5	0.200471
C14orf159	1	5	0.200471
C1GALT1C1	1	5	0.200471
C1QTNF2	1	5	0.200471
C2CD2L	1	5	0.200471
C6orf211	1	5	0.200471
CAPN6	1	5	0.200471
CARF	1	5	0.200471
CCDC81	1	5	0.200471
CDX4	1	5	0.200471
CHFR	1	5	0.200471
CHST3	1	5	0.200471
CMAS	1	5	0.200471
CNOT6	1	5	0.200471
CRYBA1	1	5	0.200471
DCST1	1	5	0.200471
DDX49	1	5	0.200471
DNAJC21	1	5	0.200471
DNM3	1	5	0.200471
DRD3	1	5	0.200471
DTNA	1	5	0.200471
DUS3L	1	5	0.200471
EGLN2	1	5	0.200471
EIF3M	1	5	0.200471
EPAS1	1	5	0.200471
EXD3	1	5	0.200471
FAM114A2	1	5	0.200471
FAM126A	1	5	0.200471
FAM222B	1	5	0.200471
FAM69B	1	5	0.200471
FANK1	1	5	0.200471
FBXO32	1	5	0.200471
FCHSD2	1	5	0.200471
FCRL2	1	5	0.200471
FECH	1	5	0.200471
FGF6	1	5	0.200471
FTMT	1	5	0.200471
FUK	1	5	0.200471
FZR1	1	5	0.200471
GABRE	1	5	0.200471
GALNT11	1	5	0.200471
GET4	1	5	0.200471
GHR	1	5	0.200471
GPATCH2	1	5	0.200471
GPKOW	1	5	0.200471
GRB7	1	5	0.200471
GRK6	1	5	0.200471
GRN	1	5	0.200471
GYG2	1	5	0.200471
H2AFY	1	5	0.200471
HCN2	1	5	0.200471
HDAC10	1	5	0.200471
HINFP	1	5	0.200471
HS3ST4	1	5	0.200471
HTR2A	1	5	0.200471
ICA1	1	5	0.200471
IKZF2	1	5	0.200471
IL13RA2	1	5	0.200471
INA	1	5	0.200471
INPP4A	1	5	0.200471
IP6K2	1	5	0.200471
ITGA2	1	5	0.200471
KAZN	1	5	0.200471
KIFC1	1	5	0.200471
KLHL17	1	5	0.200471
KLK8	1	5	0.200471
KLRG2	1	5	0.200471
KNSTRN	1	5	0.200471
KPNA2	1	5	0.200471
KPRP	1	5	0.200471
LARS2	1	5	0.200471
LMX1A	1	5	0.200471
LONRF1	1	5	0.200471
LRAT	1	5	0.200471
LRRC8D	1	5	0.200471
LUZP2	1	5	0.200471
MAGT1	1	5	0.200471
MAMDC2	1	5	0.200471
MAP6	1	5	0.200471
MAPK8	1	5	0.200471
MARVELD2	1	5	0.200471
MC1R	1	5	0.200471
MCHR1	1	5	0.200471
ME2	1	5	0.200471
MED1	1	5	0.200471
METTL22	1	5	0.200471
MIOS	1	5	0.200471
MMP11	1	5	0.200471
MUTYH	1	5	0.200471
MYADM	1	5	0.200471
MYO1G	1	5	0.200471
MYSM1	1	5	0.200471
NARF	1	5	0.200471
NCALD	1	5	0.200471
NEURL2	1	5	0.200471
NOX1	1	5	0.200471
NPY2R	1	5	0.200471
NR1D1	1	5	0.200471
NR5A1	1	5	0.200471
OAS2	1	5	0.200471
OR10J1	1	5	0.200471
OR14K1	1	5	0.200471
OR2A5	1	5	0.200471
OR2J3	1	5	0.200471
OR52E6	1	5	0.200471
OR52J3	1	5	0.200471
OR5H15	1	5	0.200471
OR5V1	1	5	0.200471
OR5W2	1	5	0.200471
OSMR	1	5	0.200471
OTOP3	1	5	0.200471
P4HA2	1	5	0.200471
PABPC1	1	5	0.200471
PARP15	1	5	0.200471
PCNXL4	1	5	0.200471
PCOLCE	1	5	0.200471
PCYT1A	1	5	0.200471
PDLIM4	1	5	0.200471
PELI3	1	5	0.200471
PHF15	1	5	0.200471
PKP2	1	5	0.200471
PLCL2	1	5	0.200471
PLXDC2	1	5	0.200471
PNLDC1	1	5	0.200471
PNMA5	1	5	0.200471
POMGNT1	1	5	0.200471
PPP1R3B	1	5	0.200471
PPWD1	1	5	0.200471
PRDM1	1	5	0.200471
PRICKLE3	1	5	0.200471
PRKCB	1	5	0.200471
PRKX	1	5	0.200471
PRPF4	1	5	0.200471
PRR5L	1	5	0.200471
PTBP1	1	5	0.200471
PTPN5	1	5	0.200471
PVRL2	1	5	0.200471
RABGAP1L	1	5	0.200471
RALBP1	1	5	0.200471
RCBTB2	1	5	0.200471
RNH1	1	5	0.200471
RPUSD2	1	5	0.200471
RSBN1	1	5	0.200471
RXFP1	1	5	0.200471
SKIDA1	1	5	0.200471
SLC23A2	1	5	0.200471
SLC25A13	1	5	0.200471
SLC29A3	1	5	0.200471
SLC35G5	1	5	0.200471
SLC39A4	1	5	0.200471
SLC39A6	1	5	0.200471
SLC43A3	1	5	0.200471
SLC5A4	1	5	0.200471
SLC6A7	1	5	0.200471
SLC7A1	1	5	0.200471
SLC7A5	1	5	0.200471
SNW1	1	5	0.200471
SP4	1	5	0.200471
SPIRE2	1	5	0.200471
SRFBP1	1	5	0.200471
SRSF6	1	5	0.200471
STS	1	5	0.200471
STXBP1	1	5	0.200471
SUPT3H	1	5	0.200471
SYNRG	1	5	0.200471
TAB1	1	5	0.200471
TBC1D13	1	5	0.200471
TCF21	1	5	0.200471
TERF1	1	5	0.200471
TGFBRAP1	1	5	0.200471
TMEM178A	1	5	0.200471
TMPRSS13	1	5	0.200471
TNFRSF13B	1	5	0.200471
TNIP1	1	5	0.200471
TNNI2	1	5	0.200471
TRIM62	1	5	0.200471
TRIM72	1	5	0.200471
TRMT1	1	5	0.200471
TRMT2B	1	5	0.200471
TUBB6	1	5	0.200471
TULP1	1	5	0.200471
UCKL1	1	5	0.200471
UNKL	1	5	0.200471
UROS	1	5	0.200471
USP15	1	5	0.200471
USP22	1	5	0.200471
USP4	1	5	0.200471
WDR44	1	5	0.200471
WISP2	1	5	0.200471
XPNPEP2	1	5	0.200471
XXYLT1	1	5	0.200471
XYLB	1	5	0.200471
ZBTB1	1	5	0.200471
ZBTB45	1	5	0.200471
ZCWPW2	1	5	0.200471
ZIC2	1	5	0.200471
ZMAT1	1	5	0.200471
ZNF117	1	5	0.200471
ZNF214	1	5	0.200471
ZNF219	1	5	0.200471
ZNF226	1	5	0.200471
ZNF280C	1	5	0.200471
ZNF528	1	5	0.200471
ZNF587B	1	5	0.200471
ZNF679	1	5	0.200471
ZNF772	1	5	0.200471
ZNF81	1	5	0.200471
ZNF93	1	5	0.200471
AFF2	2	21	0.200749
CAMTA2	2	21	0.200749
CDH8	2	21	0.200749
COL4A1	2	21	0.200749
MCM8	2	21	0.200749
PTEN	2	21	0.200749
SLC4A3	2	21	0.200749
SLX4	2	21	0.200749
DHX36	2	22	0.214523
FAM135B	2	22	0.214523
FSIP2	2	22	0.214523
HDLBP	2	22	0.214523
HIVEP3	2	22	0.214523
MEGF8	2	22	0.214523
RP1L1	2	22	0.214523
SIPA1L3	2	22	0.214523
WBSCR17	2	22	0.214523
ABCB4	2	23	0.228418
ADD3	2	23	0.228418
CARD11	2	23	0.228418
CDH11	2	23	0.228418
PKHD1	2	23	0.228418
TIAM1	2	23	0.228418
ZC3H13	2	23	0.228418
AAAS	1	6	0.230005
ADAMTSL2	1	6	0.230005
AHR	1	6	0.230005
ANAPC2	1	6	0.230005
APBB1IP	1	6	0.230005
APOBEC3H	1	6	0.230005
ARHGEF5	1	6	0.230005
ASIC3	1	6	0.230005
ATP2A3	1	6	0.230005
BAG3	1	6	0.230005
BARHL1	1	6	0.230005
BECN1	1	6	0.230005
BNC1	1	6	0.230005
C10orf118	1	6	0.230005
C7orf60	1	6	0.230005
CACNA2D2	1	6	0.230005
CAMK4	1	6	0.230005
CANX	1	6	0.230005
CAPN3	1	6	0.230005
CES5A	1	6	0.230005
CHD1L	1	6	0.230005
CHM	1	6	0.230005
CLCN4	1	6	0.230005
CLEC4M	1	6	0.230005
COL10A1	1	6	0.230005
CPXCR1	1	6	0.230005
CRYBB1	1	6	0.230005
CSK	1	6	0.230005
CSNK1E	1	6	0.230005
CUL2	1	6	0.230005
CXorf56	1	6	0.230005
DCDC2	1	6	0.230005
DDIT4L	1	6	0.230005
DEPTOR	1	6	0.230005
DMC1	1	6	0.230005
DPYS	1	6	0.230005
DZIP3	1	6	0.230005
EEF1D	1	6	0.230005
EFCAB1	1	6	0.230005
EGR2	1	6	0.230005
EIF3G	1	6	0.230005
EIF5A	1	6	0.230005
EMR1	1	6	0.230005
ENAM	1	6	0.230005
EPB41L5	1	6	0.230005
EPN1	1	6	0.230005
EXO5	1	6	0.230005
FAH	1	6	0.230005
FAM71C	1	6	0.230005
FGF14	1	6	0.230005
FOXD4	1	6	0.230005
FOXRED2	1	6	0.230005
FZD6	1	6	0.230005
GABRA5	1	6	0.230005
GCM1	1	6	0.230005
GJA4	1	6	0.230005
GK2	1	6	0.230005
GNL3L	1	6	0.230005
GP5	1	6	0.230005
GPR61	1	6	0.230005
GRHL3	1	6	0.230005
GSDMA	1	6	0.230005
GSG1	1	6	0.230005
GZMH	1	6	0.230005
HABP2	1	6	0.230005
HESX1	1	6	0.230005
HNF1B	1	6	0.230005
HOOK3	1	6	0.230005
HS3ST5	1	6	0.230005
HSDL1	1	6	0.230005
ICAM5	1	6	0.230005
IGHV1OR21-1	1	6	0.230005
INSRR	1	6	0.230005
IQGAP3	1	6	0.230005
IRF9	1	6	0.230005
IRS2	1	6	0.230005
IRX3	1	6	0.230005
IRX4	1	6	0.230005
ITGA9	1	6	0.230005
JAM3	1	6	0.230005
KDM4A	1	6	0.230005
KIAA0141	1	6	0.230005
KIN	1	6	0.230005
KLHL5	1	6	0.230005
KRT34	1	6	0.230005
LILRB3	1	6	0.230005
MCMDC2	1	6	0.230005
MMP21	1	6	0.230005
MOCS1	1	6	0.230005
MORC4	1	6	0.230005
MOV10	1	6	0.230005
MPHOSPH10	1	6	0.230005
MRGPRX1	1	6	0.230005
MSH4	1	6	0.230005
MUL1	1	6	0.230005
MYCT1	1	6	0.230005
NAPSA	1	6	0.230005
NEUROD4	1	6	0.230005
NKAPL	1	6	0.230005
NOX4	1	6	0.230005
NPHS2	1	6	0.230005
NR2F1	1	6	0.230005
NRIP3	1	6	0.230005
OPHN1	1	6	0.230005
OR10A4	1	6	0.230005
OR2D3	1	6	0.230005
OR2G3	1	6	0.230005
OR4A5	1	6	0.230005
OR4C6	1	6	0.230005
OR51B4	1	6	0.230005
OR51F1	1	6	0.230005
OR51M1	1	6	0.230005
OR8B4	1	6	0.230005
OR8D1	1	6	0.230005
P2RX2	1	6	0.230005
P2RY8	1	6	0.230005
PALB2	1	6	0.230005
PCDHGA9	1	6	0.230005
PDGFD	1	6	0.230005
PELI2	1	6	0.230005
PGGT1B	1	6	0.230005
PHACTR3	1	6	0.230005
POMC	1	6	0.230005
PPARD	1	6	0.230005
PPP1R16B	1	6	0.230005
PPP2R2C	1	6	0.230005
PRSS54	1	6	0.230005
PSMC1	1	6	0.230005
R3HDM2	1	6	0.230005
RBM4	1	6	0.230005
RIN1	1	6	0.230005
RSAD1	1	6	0.230005
RTFDC1	1	6	0.230005
RUVBL1	1	6	0.230005
SERPINF2	1	6	0.230005
SERPINI1	1	6	0.230005
SH3BP2	1	6	0.230005
SLAMF1	1	6	0.230005
SLC12A2	1	6	0.230005
SLC25A2	1	6	0.230005
SLC3A1	1	6	0.230005
SLC47A1	1	6	0.230005
SLC5A5	1	6	0.230005
SLCO4A1	1	6	0.230005
SNAPC1	1	6	0.230005
SNRPA	1	6	0.230005
SNRPN	1	6	0.230005
SPICE1	1	6	0.230005
SPNS3	1	6	0.230005
SUPT16H	1	6	0.230005
SYDE2	1	6	0.230005
TAF5L	1	6	0.230005
TANGO6	1	6	0.230005
TBCA	1	6	0.230005
TBX2	1	6	0.230005
TBX3	1	6	0.230005
TCF4	1	6	0.230005
TGFBR3	1	6	0.230005
TM6SF1	1	6	0.230005
TMEM38A	1	6	0.230005
TMTC3	1	6	0.230005
TOP1MT	1	6	0.230005
TRAPPC11	1	6	0.230005
TRIM39	1	6	0.230005
TTC7B	1	6	0.230005
USPL1	1	6	0.230005
UTP14C	1	6	0.230005
VPS11	1	6	0.230005
WIPF1	1	6	0.230005
WIPI2	1	6	0.230005
WNT2B	1	6	0.230005
XKRX	1	6	0.230005
ZBBX	1	6	0.230005
ZBTB47	1	6	0.230005
ZDHHC4	1	6	0.230005
ZNF205	1	6	0.230005
ZNF417	1	6	0.230005
ZNF425	1	6	0.230005
ZNF433	1	6	0.230005
ZNF443	1	6	0.230005
ZNF454	1	6	0.230005
ZNF486	1	6	0.230005
ZNF551	1	6	0.230005
ZNF681	1	6	0.230005
ZRANB3	1	6	0.230005
ABCC9	2	24	0.242409
BMPR2	2	24	0.242409
CDH10	2	24	0.242409
FLT4	2	24	0.242409
MYO16	2	24	0.242409
DCHS1	2	25	0.256474
GRM5	2	25	0.256474
KCNB2	2	25	0.256474
MYO3A	2	25	0.256474
P4HTM	2	25	0.256474
POLQ	2	25	0.256474
RGS22	2	25	0.256474
SULF1	2	25	0.256474
ABR	1	7	0.258523
ACSL6	1	7	0.258523
ADAM12	1	7	0.258523
ANKRD35	1	7	0.258523
ANO9	1	7	0.258523
AOX1	1	7	0.258523
AP2B1	1	7	0.258523
AP3D1	1	7	0.258523
APBB2	1	7	0.258523
APP	1	7	0.258523
ARFGAP3	1	7	0.258523
ARHGEF4	1	7	0.258523
ATMIN	1	7	0.258523
ATP11C	1	7	0.258523
ATP7A	1	7	0.258523
BAAT	1	7	0.258523
BBS10	1	7	0.258523
BBX	1	7	0.258523
BCL7C	1	7	0.258523
BRINP2	1	7	0.258523
BTN2A2	1	7	0.258523
C16orf71	1	7	0.258523
C18orf8	1	7	0.258523
C4orf22	1	7	0.258523
CCDC19	1	7	0.258523
CCDC3	1	7	0.258523
CCDC63	1	7	0.258523
CCDC83	1	7	0.258523
CCM2L	1	7	0.258523
CDC6	1	7	0.258523
CDH3	1	7	0.258523
CDYL2	1	7	0.258523
CEP85L	1	7	0.258523
CFHR4	1	7	0.258523
CFHR5	1	7	0.258523
CHRNA6	1	7	0.258523
CNBD2	1	7	0.258523
CNDP2	1	7	0.258523
CNNM2	1	7	0.258523
COLGALT1	1	7	0.258523
CPNE4	1	7	0.258523
CREBRF	1	7	0.258523
CRELD1	1	7	0.258523
CSTF1	1	7	0.258523
CYP4F11	1	7	0.258523
DGKE	1	7	0.258523
DHX34	1	7	0.258523
DKK1	1	7	0.258523
DOK6	1	7	0.258523
DPPA4	1	7	0.258523
DSG4	1	7	0.258523
DYRK3	1	7	0.258523
ECT2	1	7	0.258523
EFTUD1	1	7	0.258523
ELK3	1	7	0.258523
EML4	1	7	0.258523
EPB42	1	7	0.258523
FAM120C	1	7	0.258523
FAM160B2	1	7	0.258523
FAM60A	1	7	0.258523
FAM65A	1	7	0.258523
FAM90A1	1	7	0.258523
FANCA	1	7	0.258523
FBXO10	1	7	0.258523
FBXO47	1	7	0.258523
FGF12	1	7	0.258523
FOSL2	1	7	0.258523
FOXA3	1	7	0.258523
FOXRED1	1	7	0.258523
FSIP1	1	7	0.258523
FXR2	1	7	0.258523
FZD1	1	7	0.258523
FZD7	1	7	0.258523
G3BP1	1	7	0.258523
GAL3ST4	1	7	0.258523
GLT8D1	1	7	0.258523
GRAMD1A	1	7	0.258523
GRHL1	1	7	0.258523
HAS2	1	7	0.258523
HHAT	1	7	0.258523
HSF4	1	7	0.258523
HSP90AB1	1	7	0.258523
HTRA1	1	7	0.258523
IL4I1	1	7	0.258523
ITGB2	1	7	0.258523
KIAA1524	1	7	0.258523
KIR2DL4	1	7	0.258523
KLHDC7A	1	7	0.258523
KLHL6	1	7	0.258523
KREMEN1	1	7	0.258523
KRT13	1	7	0.258523
KRT16	1	7	0.258523
KRT33A	1	7	0.258523
KRT72	1	7	0.258523
KRTAP4-11	1	7	0.258523
LMCD1	1	7	0.258523
LRIG2	1	7	0.258523
MAPRE3	1	7	0.258523
MECP2	1	7	0.258523
MFN1	1	7	0.258523
MFN2	1	7	0.258523
MIPOL1	1	7	0.258523
MPEG1	1	7	0.258523
MSH2	1	7	0.258523
MSN	1	7	0.258523
MTHFR	1	7	0.258523
MUM1L1	1	7	0.258523
MYO1C	1	7	0.258523
N4BP2L2	1	7	0.258523
NAA16	1	7	0.258523
NDST1	1	7	0.258523
NEDD4	1	7	0.258523
NOB1	1	7	0.258523
NOVA1	1	7	0.258523
NR1I2	1	7	0.258523
NSRP1	1	7	0.258523
NUP88	1	7	0.258523
OR2F2	1	7	0.258523
OR2G2	1	7	0.258523
OR2T3	1	7	0.258523
OR2T33	1	7	0.258523
OR4A47	1	7	0.258523
OR4C12	1	7	0.258523
OR51E1	1	7	0.258523
OR6M1	1	7	0.258523
OSGIN2	1	7	0.258523
PGAP2	1	7	0.258523
PIEZO2	1	7	0.258523
PIF1	1	7	0.258523
PLEKHG5	1	7	0.258523
PPP1R3F	1	7	0.258523
PRDM14	1	7	0.258523
PSG3	1	7	0.258523
PTGFRN	1	7	0.258523
PTK2	1	7	0.258523
PUM1	1	7	0.258523
PUM2	1	7	0.258523
RDX	1	7	0.258523
RIMKLB	1	7	0.258523
RNMT	1	7	0.258523
RTEL1	1	7	0.258523
RTN1	1	7	0.258523
SCARA3	1	7	0.258523
SELP	1	7	0.258523
SEMA3F	1	7	0.258523
SEMA4A	1	7	0.258523
SEMG1	1	7	0.258523
SGCA	1	7	0.258523
SHC3	1	7	0.258523
SIGLEC12	1	7	0.258523
SLC16A4	1	7	0.258523
SLC17A3	1	7	0.258523
SLC22A17	1	7	0.258523
SLC25A45	1	7	0.258523
SLC26A5	1	7	0.258523
SLC27A4	1	7	0.258523
SLC27A6	1	7	0.258523
SLC9B1	1	7	0.258523
SLIT1	1	7	0.258523
SPG7	1	7	0.258523
SRGAP1	1	7	0.258523
ST8SIA1	1	7	0.258523
STON2	1	7	0.258523
TAF15	1	7	0.258523
TAF7L	1	7	0.258523
TBC1D10C	1	7	0.258523
TBL3	1	7	0.258523
TEX11	1	7	0.258523
TFAP4	1	7	0.258523
TM9SF4	1	7	0.258523
TMEM109	1	7	0.258523
TMEM39A	1	7	0.258523
TMPRSS11F	1	7	0.258523
TRIM29	1	7	0.258523
TRPM5	1	7	0.258523
TSC22D1	1	7	0.258523
TTLL2	1	7	0.258523
UHRF1BP1L	1	7	0.258523
USP11	1	7	0.258523
VASH1	1	7	0.258523
VAV1	1	7	0.258523
VPRBP	1	7	0.258523
WDR78	1	7	0.258523
XRRA1	1	7	0.258523
ZBTB33	1	7	0.258523
ZBTB46	1	7	0.258523
ZFP82	1	7	0.258523
ZKSCAN1	1	7	0.258523
ZNF395	1	7	0.258523
ZNF398	1	7	0.258523
ZNF514	1	7	0.258523
ZNF518B	1	7	0.258523
ZNF556	1	7	0.258523
ZNF607	1	7	0.258523
ZNF614	1	7	0.258523
ZNF675	1	7	0.258523
ZNF746	1	7	0.258523
ZSCAN1	1	7	0.258523
CNTLN	2	26	0.27059
CPAMD8	2	26	0.27059
MXRA5	2	26	0.27059
PCDHA11	2	26	0.27059
SPEF2	2	26	0.27059
BAI3	2	27	0.284736
DCLK1	2	27	0.284736
FBN3	2	27	0.284736
ABCC3	1	8	0.286058
ABTB2	1	8	0.286058
ACAD11	1	8	0.286058
ACO2	1	8	0.286058
ACOX3	1	8	0.286058
ACTR8	1	8	0.286058
AGXT2	1	8	0.286058
AKAP17A	1	8	0.286058
ALS2CL	1	8	0.286058
ANXA13	1	8	0.286058
ARHGEF2	1	8	0.286058
ASS1	1	8	0.286058
ATP11A	1	8	0.286058
ATP2B4	1	8	0.286058
BCL6	1	8	0.286058
BHLHB9	1	8	0.286058
BICD2	1	8	0.286058
BMP3	1	8	0.286058
C1orf177	1	8	0.286058
CACHD1	1	8	0.286058
CADPS2	1	8	0.286058
CAMKV	1	8	0.286058
CAND1	1	8	0.286058
CCDC110	1	8	0.286058
CCDC57	1	8	0.286058
CCDC66	1	8	0.286058
CD34	1	8	0.286058
CDHR5	1	8	0.286058
CEACAM3	1	8	0.286058
CES1	1	8	0.286058
CLOCK	1	8	0.286058
CNNM1	1	8	0.286058
COL19A1	1	8	0.286058
COL28A1	1	8	0.286058
COL4A3	1	8	0.286058
COL4A6	1	8	0.286058
COL6A1	1	8	0.286058
CORIN	1	8	0.286058
CRAMP1L	1	8	0.286058
CRNKL1	1	8	0.286058
CSTF2T	1	8	0.286058
CSTF3	1	8	0.286058
CYB5R4	1	8	0.286058
CYFIP1	1	8	0.286058
CYP26A1	1	8	0.286058
CYP2D6	1	8	0.286058
DPAGT1	1	8	0.286058
DQX1	1	8	0.286058
DRC1	1	8	0.286058
DYNC1LI1	1	8	0.286058
DYRK1A	1	8	0.286058
EPS8	1	8	0.286058
F9	1	8	0.286058
FAM46D	1	8	0.286058
FAM98C	1	8	0.286058
FBXO18	1	8	0.286058
FBXO34	1	8	0.286058
FBXO40	1	8	0.286058
FEZF2	1	8	0.286058
FGD4	1	8	0.286058
FIGNL1	1	8	0.286058
FOXM1	1	8	0.286058
GAB2	1	8	0.286058
GABRA3	1	8	0.286058
GAL3ST1	1	8	0.286058
GALNT14	1	8	0.286058
GFRA1	1	8	0.286058
GGT1	1	8	0.286058
GIGYF2	1	8	0.286058
GPR141	1	8	0.286058
GRK4	1	8	0.286058
HCN3	1	8	0.286058
HIRA	1	8	0.286058
HIST1H1B	1	8	0.286058
HMGCLL1	1	8	0.286058
HOXA1	1	8	0.286058
HPSE	1	8	0.286058
IFIH1	1	8	0.286058
IFRD1	1	8	0.286058
IKBKB	1	8	0.286058
IL1RAPL2	1	8	0.286058
INSM2	1	8	0.286058
IPO11	1	8	0.286058
ISLR2	1	8	0.286058
JMJD7-PLA2G4B	1	8	0.286058
KCNS2	1	8	0.286058
KIAA0020	1	8	0.286058
KIAA1522	1	8	0.286058
KLHL34	1	8	0.286058
LCP2	1	8	0.286058
LENG1	1	8	0.286058
LRRC3B	1	8	0.286058
LZTS1	1	8	0.286058
MAGEE2	1	8	0.286058
MAP3K13	1	8	0.286058
MAP3K6	1	8	0.286058
MATK	1	8	0.286058
MCF2L2	1	8	0.286058
MOXD1	1	8	0.286058
MPP6	1	8	0.286058
MTMR8	1	8	0.286058
MYO5B	1	8	0.286058
MYRIP	1	8	0.286058
NEO1	1	8	0.286058
NLGN2	1	8	0.286058
NOP14	1	8	0.286058
NOS2	1	8	0.286058
NXPE1	1	8	0.286058
OLFML2B	1	8	0.286058
OR4A15	1	8	0.286058
OR5M8	1	8	0.286058
OR5T1	1	8	0.286058
PABPC3	1	8	0.286058
PAM	1	8	0.286058
PAPD7	1	8	0.286058
PATZ1	1	8	0.286058
PDE6B	1	8	0.286058
PHEX	1	8	0.286058
PHKA1	1	8	0.286058
PIGB	1	8	0.286058
PJA1	1	8	0.286058
PLCH2	1	8	0.286058
PLRG1	1	8	0.286058
PMFBP1	1	8	0.286058
PPARGC1A	1	8	0.286058
PPP2R3A	1	8	0.286058
PRAM1	1	8	0.286058
PRKCQ	1	8	0.286058
PROS1	1	8	0.286058
RAP1GAP	1	8	0.286058
RBM46	1	8	0.286058
RELB	1	8	0.286058
RFX6	1	8	0.286058
RNF19B	1	8	0.286058
SEC24B	1	8	0.286058
SERPINI2	1	8	0.286058
SH3RF2	1	8	0.286058
SLCO3A1	1	8	0.286058
SMARCA1	1	8	0.286058
SORBS1	1	8	0.286058
SPOCK1	1	8	0.286058
STAG2	1	8	0.286058
STOX1	1	8	0.286058
TAS1R2	1	8	0.286058
TBC1D5	1	8	0.286058
TCHP	1	8	0.286058
TEX2	1	8	0.286058
TFAP2D	1	8	0.286058
TFE3	1	8	0.286058
TGM2	1	8	0.286058
TMEM180	1	8	0.286058
TMEM198	1	8	0.286058
TMEM60	1	8	0.286058
TMEM79	1	8	0.286058
TMPRSS11A	1	8	0.286058
TMPRSS6	1	8	0.286058
TOM1L2	1	8	0.286058
TRAP1	1	8	0.286058
TRIM56	1	8	0.286058
TRPV5	1	8	0.286058
UBR1	1	8	0.286058
UGDH	1	8	0.286058
USP13	1	8	0.286058
USP6	1	8	0.286058
WDR6	1	8	0.286058
WSB2	1	8	0.286058
XKR7	1	8	0.286058
YME1L1	1	8	0.286058
ZC3H6	1	8	0.286058
ZIM3	1	8	0.286058
ZNF169	1	8	0.286058
ZNF358	1	8	0.286058
ZNF451	1	8	0.286058
ZNF48	1	8	0.286058
ZNF66	1	8	0.286058
ZNF730	1	8	0.286058
ZNF91	1	8	0.286058
FAT4	4	65	0.289481
BRCA2	2	28	0.298894
[truncated: 1,090 more rows]

## Sheet: Supplementary Table 3
Supplementary Table 3. Copy Numer between CLDN18-ARHGAP (+) and CLDN18-ARHGAP26/6 (-) group in the cohort of Shu et al (N=32).
Gene Name	CLDN18-AHRGAP26/6 (+) group (N=8)	CLDN18-AHRGAP26/6 (-) group (N=24)	Log2FoldChange (Fusion/Non-fusion)	P value
VAMP8	1.86122	2.08808	-0.165924	0.000417955
CTB-113P19.1	1.8693	2.05437	-0.136196	0.000603219
FAHD2B	1.9302	2.09059	-0.115163	0.000694286
CHST10	1.94531	2.07365	-0.0921739	0.000904452
MICA	1.80876	2.1045	-0.218478	0.00112012
PLA1A	1.93355	2.05809	-0.0900543	0.00129065
MIR4263	1.71862	2.14096	-0.317011	0.00135565
TMCO6	1.90528	2.09754	-0.138696	0.00136811
SMIM3	1.86284	2.01756	-0.115109	0.00168043
AFAP1L1	1.8872	2.03159	-0.106359	0.00170181
CCDC69	1.86607	1.9994	-0.0995652	0.00183467
PRELID1	1.82608	2.15456	-0.238641	0.00237679
TIMD4	1.8872	1.99518	-0.0802717	0.0027267
PDE6A	1.86122	1.98738	-0.0946196	0.00290889
ARHGEF37	1.86445	2.0127	-0.11038	0.0030262
KIAA0141	1.90528	2.04264	-0.100435	0.00326558
LINC01335	1.92352	2.10577	-0.130598	0.00375293
RAP2B	2.0958	1.91506	0.130109	0.00386925
LINC01210	1.89048	2.02182	-0.0969022	0.00389642
CSN1S2AP	2.04734	1.88018	0.12288	0.00401747
ANXA6	1.8954	2.04079	-0.10663	0.00402585
TRAM2-AS1	1.91355	2.15261	-0.169837	0.0045988
NPAS2	1.96054	2.04819	-0.0630978	0.00479796
PPARGC1B	1.88884	2.03649	-0.108587	0.00500002
SPRR2D	1.91521	2.18727	-0.19163	0.00505255
RESP18	1.89704	2.11786	-0.158859	0.00507283
NCK1-AS1	1.87254	1.98978	-0.0876087	0.00517514
FST	1.86445	2.04141	-0.130815	0.0052936
MIR1471	1.77615	2.22584	-0.325598	0.00556528
C5orf46	1.85961	2.01877	-0.118478	0.0057834
PLK2	1.858	2.01573	-0.117554	0.00605529
SLC36A2	1.89048	2.00483	-0.0847283	0.00623005
GRIA1	1.90528	2.01634	-0.0817391	0.00629302
VAMP3	2.04557	1.87905	0.1225	0.00637703
LOC101927766	1.91189	1.9994	-0.0645652	0.00651891
NDST1	1.89704	2.05871	-0.117989	0.00662794
SYNE1-AS1	2.16033	1.87339	0.205598	0.00663679
SH3RF2	1.89704	2.01391	-0.08625	0.00670877
GM2A	1.87254	2.0133	-0.104565	0.00679133
CNGA3	1.94531	2.04326	-0.0708696	0.00680052
CLDN18	1.92519	2.0451	-0.0871739	0.00683057
NPY5R	2.07053	1.86663	0.149565	0.00707108
MCIDAS	1.80406	2.01816	-0.161793	0.00724514
SLC26A2	1.85961	1.99398	-0.100652	0.00756751
GPX3	1.88884	2.07803	-0.137717	0.00762484
MYOZ3	1.86768	2.01756	-0.111359	0.00775
ARHGAP31	1.97418	2.05623	-0.05875	0.00794471
ZCCHC10	1.84997	1.96535	-0.0872826	0.00798011
HAVCR1	1.87579	1.97425	-0.0738043	0.00825217
PLRG1	2.04202	1.87283	0.124783	0.00867176
HIGD2A	1.84517	2.16497	-0.230598	0.00898987
TNIP1	1.89376	2.03711	-0.105272	0.00903591
MITD1	1.8693	2.01391	-0.1075	0.00907445
LOC102467081	1.83242	2.0488	-0.161033	0.0093033
SLC35G2	1.89048	1.98319	-0.0690761	0.00968809
HOXA2	1.88884	2.21313	-0.228587	0.0097683
MRPS17	1.81347	2.04018	-0.169946	0.0100316
WWC1	1.91355	2.00181	-0.0650543	0.0100586
MIR6739	2.43893	2.01088	0.278424	0.010204
FAM212B-AS1	1.87092	2.05933	-0.138424	0.0106905
BOC	1.98103	2.09249	-0.0789674	0.0111315
MIR3141	1.67743	2.11022	-0.331141	0.011227
TRIM39	1.8954	2.16106	-0.189239	0.0113242
LYG1	1.94531	2.07741	-0.0947826	0.011564
CFLAR-AS1	1.91853	2.03895	-0.0878261	0.0115853
CYFIP2	1.9369	2.02182	-0.0619022	0.0116451
RUFY1	1.85318	2.00785	-0.115652	0.0119404
ANAPC1P1	1.90858	2.00121	-0.0683696	0.0124619
BCHE	2.22299	2.0133	0.142935	0.012518
BYSL	1.8954	2.03465	-0.102283	0.0127238
MYLK	1.96564	2.0488	-0.0597826	0.0127927
FAXDC2	1.8954	2.00362	-0.0801087	0.0128196
LCE3B	0.907519	1.82326	-1.00652	0.012838
FAM153A	1.91189	2.05437	-0.103696	0.0130054
SFT2D2	2.09943	2.00241	0.0682609	0.0130829
MIR15B	2.61852	2.07678	0.334402	0.0133194
GRPEL2	1.88557	2.03465	-0.109783	0.0133627
LOC100996694	2.02616	1.88927	0.100924	0.0134912
SNORA4	1.87254	2.28566	-0.287609	0.0135797
LARP1	1.90363	2.00241	-0.0729891	0.0136643
SI	2.24233	2.03098	0.142826	0.0139694
MIR4461	1.64718	1.99098	-0.273478	0.0142255
AADAC	2.10672	1.95295	0.109348	0.0143265
HMGN4	1.87579	2.05066	-0.128587	0.0143336
ARHGEF4	1.96564	2.01999	-0.0393478	0.0144496
PPIC	1.87254	1.982	-0.0819565	0.014529
STARD7-AS1	1.95884	2.04141	-0.0595652	0.0146883
WNT16	2.13059	1.97961	0.106033	0.014761
LARS	1.86284	1.96831	-0.0794565	0.0149258
CFB	1.87092	2.17937	-0.220163	0.0150766
OCM	1.82608	2.10831	-0.207337	0.0155108
HRH2	1.8823	2.06057	-0.130543	0.0157968
WDR55	1.83878	2.06243	-0.165598	0.0159941
DPYSL3	1.92019	2.00664	-0.0635326	0.0161422
GTF3C2-AS1	1.83719	2.0267	-0.14163	0.0164035
DPPA4	1.85639	1.9689	-0.0848913	0.0169396
CASP10	1.93858	2.02304	-0.0615217	0.0175614
ELMOD3	1.93187	2.03649	-0.076087	0.0180965
LOC649330	2.06874	1.82326	0.182228	0.0183522
IL9	2.11221	1.9459	0.118315	0.0184705
LINC01004	1.90693	2.03343	-0.092663	0.018766
LUZP6	2.11221	1.98918	0.0865761	0.0189579
MTPN	2.11221	1.98918	0.0865761	0.0189579
HNRNPCL1	2.05801	1.83042	0.169076	0.0189604
INTS12	2.0209	1.86832	0.113261	0.0194225
LY6G6D	2.30338	1.91218	0.268533	0.0194259
LY6G6E	1.76847	2.19123	-0.309239	0.0194933
CLCN3	2.00347	1.85877	0.108152	0.0195867
CUL9	1.89376	2.01877	-0.0922283	0.0196885
HSPA4L	1.99481	1.86101	0.100163	0.0196916
MIR578	2.25012	1.83428	0.294783	0.0197209
DBI	1.93187	2.06119	-0.0934783	0.0198601
FOXI3	1.82925	2.01938	-0.142663	0.020145
MXD3	1.84997	2.11978	-0.196413	0.0201757
SLC36A3	1.89868	2.02243	-0.091087	0.0201786
MIR186	1.72309	2.16432	-0.328913	0.0204222
OAZ3	1.95206	2.15002	-0.139348	0.0210303
MIR1305	2.16783	1.79654	0.271033	0.0210603
SPINK13	1.90033	2.00483	-0.0772283	0.0212638
GALNT10	1.94026	2.02182	-0.0594022	0.0213421
HAVCR2	1.88884	1.96535	-0.0572826	0.0215657
CXCL14	1.94868	2.12618	-0.125761	0.0216296
DLD	2.11404	1.99819	0.0813043	0.0216335
OR5K1	1.90858	2.2098	-0.211413	0.021649
TMCC1-AS1	1.91521	2.04695	-0.0959783	0.0217302
CTB-12O2.1	1.91355	2.00302	-0.0659239	0.0219418
REEP1	1.96564	2.04326	-0.0558696	0.0220419
FABP6	1.89048	1.99278	-0.0760326	0.0221408
CEP97	1.92853	2.02975	-0.0738043	0.0222863
SPARC	1.89704	2.0322	-0.0992935	0.0222878
GPRC6A	2.04202	1.89954	0.104348	0.0223456
UNC50	1.96394	2.07428	-0.0788587	0.0223664
KIAA1211L	1.97418	2.05066	-0.054837	0.0224649
FUCA2	2.05623	1.88131	0.128261	0.0224707
MIR16-2	2.578	2.12361	0.279728	0.0224784
GPR113	1.87417	2.0133	-0.103315	0.0230206
DRD3	1.93355	2.02609	-0.0674457	0.0230442
ABLIM3	1.91853	2.02609	-0.0786957	0.0233081
LINC01205	1.91687	2.0127	-0.0703804	0.0235686
MIR5004	1.84038	2.41525	-0.392174	0.0237867
LOC100289495	2.08132	1.91622	0.119239	0.02396
COX7A2L	1.87092	2.01999	-0.110598	0.0239756
ZNF346	1.8356	1.99038	-0.116793	0.024225
LINC00538	1.91687	2.15521	-0.169076	0.0242543
FAT2	1.9369	2.02487	-0.0640761	0.0243211
TUBA3E	1.86284	2.02182	-0.118152	0.0244277
DCTN4	1.8872	1.98798	-0.0750543	0.0245115
MIR4269	1.79782	2.20248	-0.29288	0.0247884
ZNF354A	1.84837	2.00422	-0.116793	0.0248857
LOC255187	1.89704	1.99639	-0.0736413	0.0249906
HINT1	1.85478	2.00906	-0.115272	0.0252753
ROPN1L-AS1	2.21146	1.94531	0.185	0.0253106
YRDC	1.8823	2.04326	-0.11837	0.0256996
CD180	1.91023	2.0133	-0.0758152	0.0259908
HLA-DQA1	2.46229	1.48542	0.72913	0.026092
LOC102467655	1.86607	1.9826	-0.0873913	0.0261917
CAMK2A	1.91189	2.05128	-0.101522	0.0265301
HMGXB3	1.91687	2.02548	-0.0795109	0.0267527
G3BP1	1.86607	1.97365	-0.0808696	0.0270496
LOC101929181	2.1177	1.89554	0.159891	0.027078
CNOT8	1.88557	1.98499	-0.0741304	0.0271124
SH3TC2	1.92019	2.02853	-0.0791848	0.0273188
ANAPC13	1.95376	2.07053	-0.08375	0.0273519
MIR10B	1.86768	2.27398	-0.283967	0.0274175
LAMTOR5-AS1	1.87742	1.99639	-0.0886413	0.0276539
TXNRD3NB	1.90858	1.99218	-0.0618478	0.0278074
COPG1	1.91023	2.03037	-0.0879891	0.0278488
C5orf60	1.88884	2.1429	-0.182065	0.0279851
NCAPH	1.94363	2.03281	-0.0647283	0.0281271
ESM1	1.91023	2.02975	-0.0875543	0.0283116
LOC101929607	1.96394	2.0724	-0.0775543	0.0284388
C1QTNF2	1.90858	2.00785	-0.0731522	0.028581
CIAO1	1.93858	2.06306	-0.0897826	0.0286361
SLC7A11	2.02616	1.88585	0.103533	0.0286432
GPR156	1.96054	2.04449	-0.0604891	0.0290612
CSNK1A1	1.86445	1.96535	-0.0760326	0.029213
ZFP57	2.27166	1.96831	0.206793	0.0295074
MIR1236	1.68471	2.65017	-0.653587	0.0295439
EPHB1	1.95714	2.03465	-0.0560326	0.0297808
FAM3C	2.11038	1.99398	0.0818478	0.0303836
RMND5B	1.84997	2.0133	-0.122065	0.0304968
FTH1P3	1.6979	1.93187	-0.18625	0.0312741
GEMIN8P4	2.07053	1.88415	0.136087	0.0312827
PARP14	1.93187	2.02243	-0.066087	0.0313783
LOC102467147	1.92686	2.04018	-0.0824457	0.0317029
DCBLD2	1.93187	2.01756	-0.0626087	0.031709
SNORA14B	1.8356	2.1985	-0.260272	0.0317527
MIR5705	2.03849	1.67471	0.283587	0.0319128
REV1	1.94026	2.02243	-0.059837	0.0320737
PHYKPL	1.90363	2.06741	-0.119076	0.0321368
TLR2	2.01566	1.87791	0.10212	0.0321383
MSX2	1.7854	1.98021	-0.149402	0.0323347
GPR128	1.94531	2.03649	-0.066087	0.0323406
HSPA1B	1.80563	2.17412	-0.267935	0.0324993
GLRA3	2.01566	1.87396	0.105163	0.0325059
ADRB2	1.79315	2.05437	-0.196196	0.0328797
ZNRD1-AS1	1.89868	2.05871	-0.116739	0.0329251
FBXO8	2.02265	1.8944	0.0945109	0.0329466
WDR49	2.21146	2.03527	0.119783	0.0329494
AGBL5	1.90693	2.02548	-0.0870109	0.0329521
LMAN2L	1.93858	2.0322	-0.0680435	0.0331548
C5orf45	1.87254	2.00846	-0.101087	0.0334765
LCE3C	1.04427	1.90183	-0.864891	0.0334933
HTN3	2.06694	1.87735	0.138804	0.0336665
C2	1.92019	2.07428	-0.111359	0.0337463
ZBED2	1.90693	2.06617	-0.115707	0.0338229
GRAMD1C	1.93187	2.01695	-0.0621739	0.0341366
ADAM19	1.93858	2.01391	-0.055	0.0345123
LOC101928861	2.09943	1.9814	0.0834783	0.0346471
LOC102546298	1.84676	2.00302	-0.117174	0.0348245
IL1R2	1.98103	2.06306	-0.0585326	0.0350253
CHRM2	2.08855	1.98081	0.076413	0.0350369
SERPINI1	2.19428	2.03281	0.110272	0.0352249
CPOX	1.94868	2.05871	-0.0792391	0.0353052
NDFIP1	1.90033	2.00664	-0.0785326	0.0355457
NSD1	1.8823	2.00121	-0.0883696	0.0355585
OR5K4	1.88557	2.13903	-0.181957	0.0355939
HIST1H2BI	1.8693	2.22249	-0.249674	0.0356942
TACR3	1.99308	1.86157	0.0984783	0.0358333
ARHGAP26	1.91521	2.00422	-0.0655435	0.0358461
LOC643355	1.88394	2.04387	-0.117554	0.0358552
BOD1	1.87579	2.06741	-0.140326	0.0359315
FAHD2A	1.97418	2.08116	-0.0761413	0.0359891
MRPL33	1.89048	2.02243	-0.097337	0.0363574
CIB4	1.95884	2.05685	-0.0704348	0.0366403
RGPD1	1.94194	2.01391	-0.0525	0.0367419
PPA2	1.98618	1.86775	0.0886957	0.0367532
MIR143HG	1.8823	2.01573	-0.0988043	0.0367773
TAF8	1.90363	2.02426	-0.0886413	0.0370679
SLC9A2	1.97076	2.04079	-0.0503804	0.0370761
GLI2	1.97931	2.09564	-0.0823913	0.0370792
AACSP1	1.83083	1.99699	-0.125326	0.0371556
SERF1B	1.86445	1.95707	-0.0699457	0.0372946
LOC101928370	2.04557	1.88075	0.121196	0.037654
NR1I2	1.9776	2.06243	-0.0605978	0.037754
PKD2	2.00347	1.87565	0.0951087	0.0377807
CHMP3	1.93522	2.01148	-0.0557609	0.0378853
RING1	1.78231	2.17609	-0.287989	0.0379968
ARRDC3-AS1	1.90858	1.98978	-0.0601087	0.0381507
MIR6828	2.51185	2.08054	0.271793	0.0381891
KANSL3	1.95037	2.02426	-0.0536413	0.0388967
PDLIM3	1.99481	1.85597	0.104076	0.0389381
SNHG4	1.91853	2.03343	-0.083913	0.0389541
MYOZ2	2	1.87565	0.0926087	0.0389551
GAPT	1.87092	2.01148	-0.104511	0.039029
LINC01353	1.95884	2.21313	-0.176087	0.039129
CLPSL1	1.91521	2.03956	-0.0907609	0.0392271
SLCO2A1	1.96394	2.06057	-0.0692935	0.0393449
ADAM29	2.0174	1.89155	0.0929348	0.0395204
HLA-L	1.83719	2.04079	-0.15163	0.0397023
UFL1	2.05623	1.90757	0.108261	0.0397093
PRSS12	2.00347	1.86719	0.10163	0.0398162
TMEM155	1.97418	1.85318	0.09125	0.0399175
CGA	2.05267	1.88585	0.122283	0.0402465
MGAM	2.08493	1.95648	0.0917391	0.0405422
HTR1D	2.02968	1.83484	0.145598	0.0406468
NUDT16	1.89704	2.02975	-0.0975543	0.0409354
C5orf20	1.98103	2.15976	-0.12462	0.0409703
CSF1R	1.90858	2.01513	-0.0783696	0.0410134
ZBBX	2.19428	2.0267	0.11462	0.0410827
TRABD2A	1.97931	2.06243	-0.0593478	0.0413091
GEMIN5	1.90693	1.9814	-0.0552717	0.0415396
PCDHGA11	1.93355	2.00725	-0.0539674	0.0415777
LOC101929441	2.00347	2.28497	-0.189674	0.0417412
SIDT1	1.96394	2.04387	-0.0575543	0.0417615
NT5DC1	2.04202	1.91333	0.093913	0.0418197
P4HA2	1.95884	2.05375	-0.0682609	0.0419698
ADH6	2.01042	1.88131	0.0957609	0.042047
GALM	1.90858	1.99338	-0.0627174	0.0420943
CEP44	1.99481	1.87283	0.0910326	0.0421328
SNRNP200	1.95545	2.05189	-0.0694565	0.0422027
GALNT7	2.00694	1.88188	0.0928261	0.0422126
LINC01125	1.93522	2.0206	-0.0622826	0.0422685
LOR	1.95206	2.16693	-0.150652	0.0427668
TAGLN3	1.95376	2.10197	-0.105489	0.0428056
MATR3	1.86607	1.96239	-0.0726087	0.0430355
SLU7	1.87417	1.98021	-0.0794022	0.0430417
GLRA1	1.91687	2.00604	-0.0655978	0.0433017
TMEM171	1.95714	2.07741	-0.0860326	0.0433641
CLPS	1.89376	2.1045	-0.152228	0.0433934
ADPRH	1.95037	2.06866	-0.0849457	0.0434183
POGLUT1	1.93355	2.00121	-0.0496196	0.0434804
MIR6721	1.70232	2.63266	-0.629022	0.0434994
STEAP3	1.96224	2.07053	-0.0775	0.043661
RASSF6	1.99827	1.87452	0.0922283	0.0438861
GSK3B	1.94194	2.02426	-0.0598913	0.0439669
NDST4	2	1.87622	0.0921739	0.0445354
DNAJB8	1.91023	2.10577	-0.140598	0.0445403
USP17L12	1.76847	1.96298	-0.150543	0.0448626
USP17L21	1.76847	1.96298	-0.150543	0.0448626
ETFDH	1.98618	1.85877	0.0956522	0.0448908
SOX4	1.84357	2.03037	-0.139239	0.0450093
RPS14	1.87417	2.00543	-0.097663	0.0450898
CNOT6	1.82292	1.97128	-0.11288	0.0451082
LOC339975	2.01391	1.88358	0.0965217	0.0451677
PCDHGB7	1.93355	2.00664	-0.0535326	0.0452602
LOC100652758	1.81347	2.04572	-0.173859	0.0454646
CLINT1	1.90363	1.98559	-0.0608152	0.0456637
NMS	1.97418	2.0749	-0.0717935	0.0459264
GFPT2	1.86445	2.0127	-0.11038	0.0459499
TRIM52-AS1	1.87579	2.02975	-0.113804	0.0462186
MED7	1.85639	2.03772	-0.134457	0.0462956
KCNMB1	1.94026	2.0843	-0.103315	0.0464727
MAATS1	1.97931	2.05313	-0.0528261	0.0466228
OR5H15	1.86122	2.06866	-0.152446	0.0467405
SNAR-I	2.0958	1.78413	0.232283	0.0469793
ENPP4	2.06515	1.93362	0.0949457	0.0470961
MIR3130-1	1.70675	2.11722	-0.310924	0.0471156
MIR3130-2	1.70675	2.11722	-0.310924	0.0471156
FAM153C	1.87742	2.03098	-0.113424	0.0473578
RBM46	1.97931	1.86213	0.0880435	0.0473608
HCP5	1.77	2.06928	-0.22538	0.0474231
COL23A1	1.90363	2.05066	-0.107337	0.0474658
LNP1	1.95714	2.04449	-0.0629891	0.0478748
RPS18P9	2.09762	1.8376	0.190924	0.0480408
AADAT	2.02968	1.88472	0.106902	0.0481346
NPHP3-AS1	1.94026	2.00725	-0.0489674	0.0481506
HTR4	1.90363	1.99579	-0.0682065	0.0481805
PCDHGB6	1.93355	2.00604	-0.0530978	0.0481909
NPY1R	2.0174	1.86213	0.115543	0.048225
NEK1	1.98275	1.86663	0.0870652	0.0483263
CAPG	1.9302	2.06057	-0.0942935	0.048335
SNRPG	1.88067	1.98439	-0.0774457	0.0484142
CRABP2	1.92686	2.20381	-0.19375	0.0487853
PVRL3-AS1	1.94026	2.02548	-0.0620109	0.0488386
PCDHGA9	1.9369	2.00785	-0.0519022	0.0489397
SLC35A4	1.858	2.04695	-0.139728	0.0489742
CSN2	2.04202	1.92142	0.0878261	0.0491853
KIAA1191	1.90363	2.05437	-0.109946	0.0492522
ZNF2	1.92519	2.02792	-0.075	0.0494131
GUCA1C	1.93522	2.02304	-0.0640217	0.0494964
EIF5B	1.92686	2.01148	-0.0620109	0.0495139
LOC257396	1.86445	2.01088	-0.109076	0.0495827
VDAC1	1.90198	2.00785	-0.0781522	0.0496508
PCDHGA10	1.93355	2.00483	-0.0522283	0.0497715
S100A7A	1.99308	2.19255	-0.137609	0.0498103
MIR4283-1	1.87254	2.16562	-0.209783	0.0499535
MIR4283-2	1.87254	2.16562	-0.209783	0.0499535
MAPK9	1.86284	2.00846	-0.108587	0.0499763
RAPGEF2	1.99827	1.87509	0.0917935	0.0501988
DRC1	1.88394	2.00906	-0.0927717	0.0502264
LSM11	1.92686	2.04264	-0.0841848	0.0503125
CENPU	1.99827	1.86888	0.0965761	0.0504682
TM4SF1	2.2019	2.05561	0.0991848	0.0506269
PCDHGB5	1.9369	2.00725	-0.0514674	0.0507478
LOC100507201	2.07952	1.96357	0.0827717	0.0509078
RNF25	1.92352	2.04387	-0.0875543	0.0509538
HIST1H3E	1.76847	2.03037	-0.199239	0.0509847
LINC01222	2.1269	2.02731	0.0691848	0.0509907
RAB7A	1.90858	1.98918	-0.0596739	0.0510312
BPGM	2.10855	1.97961	0.0910326	0.0510562
S100A14	2.00347	2.26782	-0.178804	0.0510779
ATOX1	1.88557	1.99398	-0.0806522	0.0511612
PHIP	2.02792	1.90355	0.0913043	0.0511944
HIST1H4E	1.8245	2.07365	-0.184674	0.051205
PRSS2	1.6979	2.24673	-0.404076	0.051297
ZDHHC23	2.01566	2.11404	-0.06875	0.0513199
HIST1H2APS1	2.20955	1.95059	0.179837	0.0514122
ADH4	1.99654	1.88018	0.0866304	0.0514297
HIST1H3J	1.83401	2.05933	-0.167174	0.0514547
LMAN2	1.87579	2.04819	-0.126848	0.0514602
MAP9	2.00521	1.87283	0.0985326	0.0515738
GPBP1	1.87742	1.95412	-0.0577717	0.0516187
LCP2	1.90693	2.06057	-0.111793	0.0516494
C6orf222	1.98618	2.10323	-0.0826087	0.0516952
C2orf15	1.86768	1.96653	-0.0744022	0.0517272
MSMO1	1.97247	1.84038	0.1	0.0517506
ELFN1-AS1	1.8954	2.15716	-0.18663	0.0518487
CCNJL	1.93355	2.00181	-0.0500543	0.0519295
ADH1C	2.01042	1.88188	0.0953261	0.0519584
MIR7161	2.17535	1.8944	0.199511	0.0521189
WEE2	2.11221	1.99338	0.0835326	0.0521468
CLPTM1L	1.91853	2.06306	-0.104783	0.0521843
MIR944	2.43682	2.03465	0.260217	0.0523632
BNIP1	1.85478	1.99098	-0.102228	0.0525452
SMIM15	1.88884	2.01938	-0.096413	0.0525866
MIR3662	2.16783	1.83927	0.23712	0.0527316
LOC101929753	1.9302	2.01938	-0.065163	0.0527758
RARRES1	2.1269	2.01816	0.0757065	0.0528886
IFT122	1.95884	2.05561	-0.0695652	0.0533335
HHLA2	1.96905	2.05313	-0.0603261	0.0534465
STAG1	1.90528	1.96416	-0.043913	0.0538014
NDST3	1.99308	1.87622	0.0871739	0.0538229
PANK3	1.88394	1.96475	-0.0605978	0.0538888
BBS12	2.04734	1.89954	0.108098	0.054336
SLITRK3	2.18859	2.03465	0.105217	0.0544603
PCDHGC3	1.9302	2.02304	-0.0677717	0.0544609
MIR548A1	1.82766	2.22517	-0.283913	0.0544798
AMBN	1.98446	1.84593	0.104402	0.0545576
ASF1A	2.0332	1.87848	0.114185	0.0547451
LINC00635	1.95376	2.04942	-0.0689674	0.054876
LOC340107	1.95037	2.07928	-0.092337	0.0548932
PCDHAC2	1.93858	2.02121	-0.0602174	0.0548949
NEIL3	2	1.85541	0.108261	0.054983
MMRN1	2.00521	1.88699	0.087663	0.0550954
SLIT3	1.91853	2.03098	-0.0821739	0.0551058
PPP2R2B	1.91687	1.9994	-0.0608152	0.0551074
ZC3HAV1L	2.10125	1.96475	0.0969022	0.0552759
IL31RA	1.91853	1.99699	-0.0578261	0.0553377
LINC01213	2.16595	1.94414	0.15587	0.0553687
SLC38A9	1.89868	1.97068	-0.0536957	0.0554849
VTRNA1-2	1.70971	1.98798	-0.217554	0.0554884
ENC1	1.8954	1.99338	-0.0727174	0.0555332
GPR151	1.82925	2.03527	-0.153967	0.0555627
PLK4	1.96905	1.82987	0.105761	0.0556421
PCDHGA12	1.9302	2.00483	-0.0547283	0.0557572
LOC101927087	2.00173	1.87339	0.0955978	0.0558086
RPL24	1.93858	2.06368	-0.0902174	0.0558965
MIR3936	1.76847	2.12425	-0.264457	0.0559774
IL17B	1.90858	2.06679	-0.114891	0.0559811
PTPRZ1	2.11221	2.00241	0.0770109	0.0560196
LOC349160	2.06694	1.97484	0.0657609	0.0560393
CFAP44-AS1	1.93522	2.00302	-0.0496739	0.0561891
HCG17	1.90363	2.0133	-0.0808152	0.0562976
PLGLB2	1.93522	2.03711	-0.0740217	0.0563415
DDX56	1.94868	2.16758	-0.153587	0.0563838
TIFAB	1.92686	2.11595	-0.135054	0.0565364
ABCC5-AS1	1.96394	2.08493	-0.08625	0.056608
GPR63	2.01915	1.89497	0.0915761	0.0566208
WWC2	1.98103	1.87057	0.0827717	0.0566815
TBC1D8	1.95206	2.02487	-0.0528261	0.0567553
TCOF1	1.92019	2.04757	-0.092663	0.0569033
HIST1H2BD	1.85639	1.99218	-0.101848	0.0570782
PMVK	1.97076	2.15521	-0.129076	0.0573234
SLC25A2	2.09217	1.90872	0.132391	0.0573669
ANKRD34B	1.89048	1.97961	-0.0664674	0.057437
PLGLB1	1.93522	2.03772	-0.0744565	0.0574707
BFSP2	1.92352	2.00664	-0.0610326	0.0575581
TAP2	1.88557	2.11786	-0.167609	0.057643
LOC100996385	1.84837	1.99879	-0.11288	0.0577901
LCE2A	2.32141	2.07303	0.163261	0.0579085
FAM212B	1.95376	2.05499	-0.0728804	0.0583477
HYALP1	2.10125	1.96357	0.0977717	0.0585179
LINC01098	2.00694	1.86663	0.104565	0.0585393
IL17A	1.8872	2.00422	-0.0867935	0.058653
SLC25A31	1.99827	1.87791	0.0896196	0.0587349
MYCT1	2.02265	1.90069	0.0897283	0.0587921
ARL13B	1.92519	1.99819	-0.0536957	0.0588082
LOC100240728	1.84038	2.05251	-0.157391	0.0592242
LINC00883	1.95376	2.02792	-0.05375	0.0592403
PCDH18	1.98791	1.84927	0.104293	0.0593743
CPLX2	1.92186	2.06928	-0.10663	0.0594511
FBXO36	1.88884	1.96239	-0.0551087	0.0595949
C2orf70	1.95714	2.05809	-0.0725543	0.059607
KIAA1147	2.10125	2.0006	0.0708152	0.0596076
UMPS	1.93355	2.00543	-0.052663	0.0596378
DNAJC5G	1.89704	2.03895	-0.104076	0.0597274
GALNTL6	2.00173	1.88472	0.0869022	0.0597649
SLC35F6	1.92686	2.05499	-0.0928804	0.0598024
FAM136A	1.88067	2.09438	-0.155272	0.0599291
TMCC1	1.92186	1.98798	-0.0488043	0.0599912
SPICE1	1.95037	2.03588	-0.0619022	0.0601286
BRD8	1.87579	1.96653	-0.0681522	0.0603607
TNP1	1.81504	2.06181	-0.183913	0.0608097
SPINK5	1.90033	1.99098	-0.0672283	0.0609725
LOC102467223	1.92352	2.00604	-0.0605978	0.0609955
ASIC5	1.99308	1.86888	0.0928261	0.0611325
PYGO2	1.95714	2.18595	-0.159511	0.0611612
SLC22A16	2.02792	1.90988	0.0865217	0.0612077
TTLL4	1.89868	1.97902	-0.0597826	0.0613463
HLA-F-AS1	1.92186	2.18266	-0.183587	0.0615722
KIF4B	1.84997	2.03649	-0.138587	0.061585
UBTD2	1.84038	1.97128	-0.0991304	0.0619822
UFSP2	1.98103	1.86157	0.0897283	0.0623232
C5orf66	1.96564	2.0488	-0.0597826	0.0623997
SLC9B1	1.98275	1.87226	0.0827174	0.0625519
C4orf32	2.00521	1.88984	0.0854891	0.0625531
CDV3	1.9302	2.01634	-0.0629891	0.0626741
HLA-B	2.6072	1.84148	0.50163	0.0628389
FSTL5	1.99308	1.87452	0.0884783	0.0628782
CHL1-AS1	1.98446	1.85653	0.0961413	0.0629156
PP7080	1.8693	2.16824	-0.214022	0.0632511
LOC100129138	2.01566	1.87735	0.102554	0.0633209
CENPE	1.98618	1.87678	0.0817391	0.0633535
TCF7L1	1.97418	2.04634	-0.0517935	0.0634522
SPINK14	1.89376	1.98978	-0.0713587	0.0634531
KY	1.98791	2.08996	-0.0722283	0.0635089
CSN1S1	2.04026	1.91045	0.094837	0.063565
HELQ	1.97589	1.8655	0.0829348	0.0636762
CD200	1.947	2.03588	-0.0644022	0.0638228
MFAP3L	2.0209	1.88642	0.0993478	0.0638415
LOC101927907	1.9302	2.01148	-0.0595109	0.0638679
HIST1H1C	1.88067	2.15261	-0.194837	0.063939
MIR378F	1.74261	2.02853	-0.219185	0.0644368
OR5K2	1.90528	2.16562	-0.184783	0.0644626
INPP4A	2.00694	2.06181	-0.038913	0.0644646
LINC01330	2.19428	2.05066	0.097663	0.0645088
MYLK-AS2	1.93522	2.09817	-0.11663	0.0645408
UBE2D2	1.86284	1.94355	-0.0611957	0.0649952
MRPS10	1.91853	2.05623	-0.1	0.0650859
KIAA1109	1.99308	1.87735	0.0863043	0.0652038
LOC100271832	1.89048	1.98081	-0.067337	0.0652893
SLC22A4	1.97931	2.05128	-0.0515217	0.0653289
HSF2	2.02265	1.90413	0.0871196	0.0653762
VEGFC	2.01042	1.86494	0.10837	0.0654268
LINC01104	1.99308	2.05189	-0.0419565	0.0654967
ATOH8	1.96905	2.09943	-0.0925	0.0655747
LYG2	1.90198	2.01573	-0.0838043	0.0656197
STRIP1	1.96394	2.05313	-0.0640761	0.0657103
H2AFY	1.97589	2.05251	-0.0548913	0.0657342
GPX6	1.90858	2.03037	-0.0892391	0.0657732
QTRTD1	1.96224	2.05313	-0.0653261	0.0658066
LINC00499	1.99654	1.88415	0.083587	0.0660062
DAAM2	1.96394	2.04757	-0.060163	0.0660321
LINC01159	1.9302	2.11914	-0.134728	0.0660914
OTOF	1.9369	2.06306	-0.0910326	0.0661199
PCDH10	1.99308	1.86719	0.0941304	0.0661644
ANKRD53	1.93355	2.14613	-0.150489	0.0661714
PROS1	1.93355	2.00181	-0.0500543	0.0662131
LINC00568	1.90693	2.13645	-0.163967	0.0662827
CASP3	2.00347	1.86607	0.1025	0.0663859
LOC101927697	1.94026	2.01452	-0.0541848	0.0663947
RXFP1	1.98618	1.87509	0.0830435	0.0664224
ANKRD37	1.99308	1.84426	0.111957	0.0664747
PPP2R5D	1.92352	2.03281	-0.0797283	0.0665732
LOC101928154	1.95206	2.13839	-0.131522	0.0666553
BOLA3	1.91355	2.0988	-0.133315	0.0667845
PXT1	1.89704	1.99819	-0.0749457	0.0669497
ACTR3BP2	2.13059	1.96061	0.119946	0.0669959
VIP	2.05979	1.91737	0.10337	0.0670743
FAM153B	1.89048	2.03037	-0.102989	0.0670791
HEG1	1.93858	2.01877	-0.0584783	0.067153
MIR4277	1.91521	2.25963	-0.238587	0.0671752
LOC101927926	1.86607	2.04819	-0.134348	0.0672302
DOK3	1.89048	2.09122	-0.145598	0.0673247
MIR2277	1.75777	2.1064	-0.261033	0.0673486
SLC25A51P1	2.06515	1.87339	0.140598	0.0678025
SPOCK3	1.99481	1.87961	0.0858152	0.0678403
TBPL1	2.02792	1.90872	0.0873913	0.0680895
PPP1R10	1.8693	1.99699	-0.0953261	0.0680924
IL20RB	1.95206	2.01634	-0.0467391	0.0681241
MIR4434	2.10672	1.85094	0.186739	0.0681971
C3orf52	1.95545	2.03834	-0.0598913	0.0682973
ZFP2	1.86284	1.99639	-0.0998913	0.068456
ARL10	1.85157	2.02243	-0.127337	0.068472
SLC4A9	1.94868	2.03956	-0.0657609	0.0684743
HAND2-AS1	2.01042	1.87339	0.101848	0.0684955
SYNPO	1.92853	2.04449	-0.0842391	0.0689187
LOC102503427	1.94026	2.01816	-0.0567935	0.068999
TSPAN17	1.90693	2.09754	-0.137446	0.069083
CDC42SE2	1.89048	1.95353	-0.047337	0.0691041
TFCP2L1	1.95037	2.02182	-0.0519022	0.0691385
RAB32	2.07053	1.93071	0.10087	0.0691901
TMEM131	1.95545	2.02426	-0.0498913	0.069281
MANEA-AS1	2.03496	1.90069	0.0984783	0.0692966
REN	2.03144	2.1985	-0.114022	0.0693748
TUBB	1.84517	2.18661	-0.244946	0.0694658
TENM2	1.93858	1.99639	-0.0423913	0.0694717
LOC100505841	1.91355	1.99819	-0.0624457	0.0695887
MEPE	1.98446	1.87001	0.0857065	0.0696829
CD8B	1.947	2.03098	-0.0609239	0.0696854
FRK	2.02792	1.91737	0.0808696	0.0697237
LINC00290	1.98791	1.86719	0.0903804	0.0697384
TTK	2.00694	1.89668	0.0815217	0.0698052
GPR149	2.10307	2.00906	0.0659783	0.0698567
TIGD6	1.87092	1.99098	-0.0897283	0.0699209
LOC285629	1.96735	2.09122	-0.0880978	0.0702486
LOC101927282	2.01042	1.87791	0.0983696	0.0702649
C5orf66-AS2	1.95376	2.09817	-0.10288	0.0704193
MIR4647	1.92186	2.24335	-0.223152	0.0705243
NR3C1	1.91189	1.99458	-0.061087	0.0706359
POLD2	1.97931	2.21113	-0.159783	0.0708929
TUBE1	2.02616	1.90528	0.08875	0.0709795
SPDYE7P	1.92019	2.12042	-0.143098	0.071225
SPP1	1.98275	1.84426	0.104457	0.0713484
POLR1A	1.96394	2.03588	-0.0519022	0.0713602
PHF1	1.87742	2.08808	-0.153424	0.0714033
FBXW7	1.9776	1.87283	0.0785326	0.0714255
HIST1H4I	1.97247	2.32036	-0.234348	0.071544
FSTL4	1.95714	2.02731	-0.0508152	0.0716934
RARS	1.89704	1.97187	-0.0558152	0.0717285
RAB13	1.93858	2.1026	-0.117174	0.0720003
CNNM4	1.93355	2.0133	-0.0583152	0.0720833
CTB-178M22.2	1.89212	2.05685	-0.120435	0.0720857
KIAA0319	1.93522	2.01573	-0.0588043	0.0722393
NUDT6	2.0174	1.89497	0.0903261	0.0725241
SCLT1	1.97247	1.86663	0.0795652	0.0726778
SEC61A1	1.92686	2.02853	-0.0741848	0.0726933
APOM	1.82608	2.10197	-0.202989	0.0727731
FAM53C	1.90528	1.99338	-0.0652174	0.0728989
CFH	2.10125	2.0206	0.0564674	0.073071
LOC101929412	1.95037	2.09943	-0.10625	0.0733246
THAP6	2.00347	1.87113	0.098587	0.0734263
HSD3B1	1.98618	2.13324	-0.103043	0.0734673
STK10	1.8872	2.01513	-0.0946196	0.073522
KLHL2	1.97247	1.85933	0.0852174	0.0736045
PLCXD2-AS1	2.33755	2.06554	0.178478	0.0738467
UGT8	2.00173	1.89041	0.0825543	0.0739622
ZNF277	2.07232	1.98738	0.0603804	0.0740116
PCDHGA8	1.94026	2.00604	-0.0480978	0.0740604
ATP5F1	2.07952	1.9695	0.0784239	0.0742875
ZBTB20-AS1	1.94194	2.02792	-0.0625	0.0743121
MIR921	1.9776	2.35133	-0.249728	0.0743614
LOC100505658	1.86122	1.97009	-0.0820109	0.0743879
MYOT	1.86284	1.95884	-0.0725	0.0745253
HNRNPA0	1.82134	1.95353	-0.101087	0.0746402
LINC00901	1.91853	2.00121	-0.0608696	0.0747048
VTA1	2.0209	1.9047	0.0854348	0.0749761
SLC9A9-AS1	2.18291	2.03465	0.101467	0.0749941
FAM196B	1.90858	2.03834	-0.0948913	0.0750533
PROP1	1.89704	2.06306	-0.121033	0.0753513
CHCHD6	1.94026	2.00906	-0.0502717	0.0756139
PP12613	2	1.84704	0.114783	0.075845
REPS1	2.00521	1.89897	0.0785326	0.0758486
SNORA77	1.90858	2.19057	-0.198804	0.0758858
CLDN20	2.02792	1.89041	0.101304	0.0759968
MIR3605	1.80094	2.09312	-0.216902	0.0759975
SAPCD1	1.71564	2.1134	-0.300815	0.0760953
ANK2	1.98275	1.87791	0.0783696	0.0761467
DMGDH	1.91687	1.98499	-0.0503804	0.0762664
GYPB	2	1.87565	0.0926087	0.0763455
CRTC2	2.00173	2.15976	-0.10962	0.0764191
MIR3123	2.44105	2.05933	0.245326	0.076626
MIR4757	1.84517	2.16628	-0.231467	0.0766679
CCDC142	1.97589	2.1371	-0.113152	0.076701
NIT2	1.94363	2.02426	-0.0586413	0.0767372
GLTSCR1L	1.86445	1.95001	-0.0647283	0.0768045
CRCP	1.92519	2.07678	-0.109348	0.0770428
SPATA5	1.98618	1.88018	0.0791304	0.0770858
FAM193B	1.9302	2.06866	-0.0999457	0.0771421
LOC102723427	1.947	2.10895	-0.115272	0.077145
CXCL11	2.06158	1.88927	0.125924	0.0771952
ADAM30	1.91189	2.06306	-0.109783	0.0772535
FAM71B	1.89704	2.01695	-0.0884239	0.0773735
FABP2	2.08132	1.92432	0.113152	0.0773841
CA14	2.00868	2.19123	-0.125489	0.0774284
EIF4E1B	1.90198	2.05933	-0.114674	0.0776392
PCDHGA7	1.94194	2.00543	-0.046413	0.0777708
LOC643201	1.91189	2.05375	-0.103261	0.0777717
MIR4780	2.39081	1.98978	0.264891	0.0778386
LOC101929034	1.85157	2.13581	-0.206033	0.0779346
ADH1A	1.99308	1.88642	0.0793478	0.0783961
KLHDC3	1.95037	2.08116	-0.0936413	0.0785236
SLC36A1	1.947	2.02182	-0.0544022	0.0785941
GPR39	1.98446	2.03037	-0.0329891	0.0787572
TES	2.11404	2.00543	0.076087	0.07877
MIR6891	3.14106	1.9689	0.673859	0.0787943
PLAC8L1	1.90198	2.00604	-0.0768478	0.0789249
C3orf17	1.94194	2.03588	-0.0681522	0.0789498
ADAT2	2.0174	1.88927	0.0946739	0.0789648
NCK1	1.91853	1.97782	-0.043913	0.0790117
UGT2B11	2.03496	1.91391	0.0884783	0.0790672
HBS1L	2.02441	1.90872	0.0848913	0.0791358
LINC01216	1.98791	1.86719	0.0903804	0.0792254
FAM134A	1.93522	2.06119	-0.0909783	0.0793451
GRIA2	1.99135	1.87735	0.0850543	0.0793682
HSD3BP4	1.9302	2.08493	-0.11125	0.0796126
TCTE3	2.03144	1.89041	0.103804	0.0799257
ARHGEF33	1.94868	2.01573	-0.0488043	0.0800572
SERPINI2	2.18669	2.0322	0.105707	0.0801053
UGT2B28	1.99308	1.87226	0.0902174	0.08038
LINC01304	1.94026	2.0206	-0.0585326	0.0806333
NUDT9	1.95037	1.83982	0.0841848	0.0806408
PAPSS1	1.98275	1.87339	0.0818478	0.0806466
LOC202181	1.88394	2.00302	-0.0884239	0.0806614
SNRPE	1.90198	2.03834	-0.0998913	0.0808152
APH1A	1.97418	2.10831	-0.094837	0.0811212
PRELID2	1.92519	2.00241	-0.0567391	0.0811673
LOC645513	2.00173	1.89269	0.0808152	0.0811876
HJURP	1.92686	2.00483	-0.0572283	0.0812006
FAF2	1.84517	1.98021	-0.101902	0.0812415
MAML1	1.8693	1.99158	-0.091413	0.081407
PRSS3P2	1.83401	2.26031	-0.301522	0.0814639
LOC101928136	1.93187	2.06741	-0.0978261	0.0818083
SMARCAD1	1.97418	1.87113	0.077337	0.0818549
PRR27	2.03672	1.90241	0.0984239	0.0818576
ERGIC1	1.91521	2.03895	-0.0903261	0.0819019
OR12D3	1.75321	2.08619	-0.25087	0.0819184
MARCO	1.9776	2.03404	-0.0405978	0.0819255
LOC100133050	1.88557	1.98439	-0.0736957	0.0819348
DPPA2	1.90858	1.99218	-0.0618478	0.0820574
MIR4266	2.28747	1.9418	0.236359	0.0821898
NUS1	2.01915	1.90988	0.0802717	0.0822673
SNHG15	1.98963	2.15716	-0.11663	0.0822876
LEKR1	2.10855	2.01938	0.062337	0.0824784
POGK	2.02265	2.11595	-0.0650543	0.0825406
CCT6P3	1.947	2.06554	-0.0852717	0.0826166
TLR3	2.00347	1.87339	0.0968478	0.0830362
SLC25A48	1.98275	2.06617	-0.0594565	0.0830711
ACSL6	1.97589	2.06243	-0.0618478	0.083202
CBR4	1.99308	1.88642	0.0793478	0.0832628
ADCY5	1.98103	2.06741	-0.0615761	0.0833873
LINC01099	1.99308	1.86269	0.0976087	0.083446
LOC101927181	1.89704	2.11276	-0.15538	0.0835578
SH3RF1	1.97418	1.87283	0.0760326	0.0836646
NMUR2	1.92352	2.03404	-0.0805978	0.0838077
IMMT	1.91521	1.99338	-0.0577174	0.0838699
C2orf78	1.91023	2.05747	-0.10712	0.0838865
RSPH4A	2.01915	1.89725	0.089837	0.0838901
HIST1H4G	2.25793	1.97128	0.19587	0.0838988
KCNK5	1.96905	2.07866	-0.0781522	0.0842586
POTEE	1.96905	2.02426	-0.0398913	0.0844269
SOX30	1.88557	1.95648	-0.0532609	0.0846129
CDK7	1.85961	1.94355	-0.0636957	0.0847819
LINC00616	1.97418	1.87226	0.0764674	0.0848082
MME	2.09762	2.00906	0.0622283	0.0848769
ZFP62	1.88067	2.00302	-0.0909239	0.0848794
PRPH2	1.94363	2.03588	-0.0669022	0.08488
FAM178B	1.96735	2.05251	-0.0611413	0.0849307
LOC100507053	1.98275	1.87905	0.0775	0.0849425
KIF20A	1.90198	2.01756	-0.0851087	0.0849827
EMCN	1.98446	1.87226	0.0839674	0.0851809
AFF3	1.96905	2.02609	-0.0411957	0.0852576
WDR17	1.99308	1.86326	0.0971739	0.0852667
HIST2H2BC	1.8823	2.15326	-0.194022	0.0853229
NOTCH4	1.94868	2.13517	-0.131848	0.0853855
SENP6	1.98963	1.88642	0.0768478	0.085411
C6orf118	1.99481	1.88813	0.0792935	0.0855129
SELE	2.17159	2.05809	0.0774457	0.0855146
LINC00211	1.96224	2.0206	-0.0422826	0.0855537
ST3GAL5	1.95206	2.01695	-0.0471739	0.0856728
TTC29	1.98791	1.88075	0.0799457	0.0856985
MRAP2	2.02265	1.91911	0.0758152	0.0857555
PCNAP1	2.11038	1.88131	0.165761	0.0857728
DPY30	1.86768	1.96653	-0.0744022	0.0859119
ST3GAL6-AS1	1.93187	2	-0.05	0.0859768
HIST1H3D	1.87417	2.05128	-0.130272	0.0860323
IL3	1.9776	2.12361	-0.102772	0.0861555
NYAP2	3.20984	1.99458	0.686413	0.0861727
LOC101927134	1.90363	1.97425	-0.0525543	0.086251
ARHGEF26	2.07592	1.99699	0.0559239	0.086321
VEPH1	2.10125	2.01816	0.0582065	0.0864582
STX19	1.8954	1.99038	-0.0705435	0.0864845
CMSS1	1.95714	2.03037	-0.0529891	0.0866065
DEF6	1.94531	2.04819	-0.0743478	0.0866803
LOC100506022	2.13243	1.94472	0.132935	0.0870129
PCCB	1.92686	1.99158	-0.047663	0.0871442
PRKG2	1.97931	1.87226	0.0802174	0.0871689
LOC646736	3.30008	2.01999	0.708152	0.0874032
GTF2IRD1P1	1.97931	2.11786	-0.0976087	0.0874087
CEP162	2.00868	1.91103	0.0719022	0.0875086
GSTCD	1.98103	1.87735	0.0775543	0.0875088
C7orf55-LUC7L2	2.05623	1.95766	0.0708696	0.0875872
SMPDL3A	2.04734	1.91391	0.0972283	0.0877972
LOC101928371	1.95206	2.01452	-0.0454348	0.0878735
SMR3A	2.03672	1.87113	0.122337	0.0879815
NPNT	1.98275	1.87848	0.0779348	0.0880227
TMEM45A	1.96224	2.03343	-0.051413	0.0881402
HERC5	1.96224	1.86157	0.0759783	0.088334
CSN1S2BP	2.0174	1.87961	0.102065	0.0884212
LOC440895	1.92186	2.12746	-0.14663	0.0884428
MIR765	1.91853	2.22718	-0.215217	0.0884887
GRID2	1.98963	1.88301	0.0794565	0.0885267
ZNF326	2.0209	1.91911	0.0745652	0.0885289
KCNF1	1.88884	2.2366	-0.243804	0.0885299
NEURL1B	1.92853	2.06741	-0.100326	0.0885805
MTTP	1.99654	1.89041	0.0788043	0.0886558
LINC01276	1.99827	2.11786	-0.0838587	0.0887816
PCDHGB2	1.94363	2.00422	-0.0442935	0.0888894
SCOC-AS1	2.00694	1.89783	0.0806522	0.0889135
UGT2A1	1.99481	1.88245	0.0836413	0.0890634
TMEM184C	1.96905	1.84537	0.093587	0.0890784
CYB5R4	2	1.91103	0.0656522	0.0891143
LINC01265	1.95376	2.10007	-0.104185	0.0891844
LOC101928093	1.87905	2.04202	-0.12	0.0893738
TRAPPC11	1.96905	1.86382	0.0792391	0.0893779
RBM27	1.86768	1.94355	-0.0574457	0.0894275
ELMOD2	2.00173	1.89783	0.0769022	0.0896116
SLC9A4	1.97931	2.05809	-0.0563043	0.0897284
PDCD10	2.19619	2.05871	0.0932609	0.0897764
MIR4778	1.85157	2.1134	-0.190815	0.0897875
BTNL9	1.87092	2.00967	-0.103207	0.0899753
MGLL	1.947	2.03588	-0.0644022	0.0899911
IL12B	1.96735	2.06368	-0.0689674	0.0900165
RPL35A	1.86768	2.00906	-0.105272	0.0900366
SORBS2	1.98446	1.88188	0.0765761	0.0900865
ZNF80	1.9302	2.06866	-0.0999457	0.0901211
LINC00613	1.98791	1.87735	0.0825543	0.0902515
FBXO38	1.92686	2.00422	-0.0567935	0.0903417
FAT4	1.99654	1.88813	0.0805435	0.0908702
HIPK2	2.14169	2.00362	0.0961413	0.0910534
ZNF853	1.95376	2.15391	-0.140707	0.0912323
TGFBI	1.97247	2.05561	-0.0595652	0.09137
TBCK	1.98275	1.88245	0.0748913	0.0914507
STXBP5	2.01566	1.90413	0.0821196	0.0916021
SRA1	1.91189	1.99879	-0.0641304	0.091641
LUC7L2	2.05623	1.96002	0.0691304	0.091709
ZBTB11	1.94194	2.02365	-0.0594565	0.0917343
LOC101926963	1.92519	2.13774	-0.151087	0.0917627
FTMT	2.22106	1.95943	0.180815	0.0918631
C2orf47	2.09943	2.0006	0.0695652	0.091879
BANK1	1.98275	1.87905	0.0775	0.0919518
FAM13A-AS1	1.97076	1.84871	0.0922283	0.0919536
TECRL	1.99135	1.87565	0.0863587	0.0919614
STATH	2.06158	1.93013	0.0950543	0.0919677
RASGEF1C	1.89868	2.03098	-0.0971739	0.0920407
HSPA4	1.8872	1.95412	-0.0502717	0.0920602
PLCXD2	1.97076	2.03527	-0.0464674	0.0920874
RPL23AP7	1.92019	2.07741	-0.113533	0.0921333
TRIM7	1.90693	2.05933	-0.110924	0.0921413
PCDHB4	1.8954	2.02609	-0.0961957	0.0921425
CLVS2	2.04379	1.93013	0.0825543	0.092175
TENM3	1.97418	1.86775	0.0799457	0.092199
GPX1	2.04026	1.82271	0.162663	0.0923331
IMPG1	2.01566	1.91045	0.077337	0.0925524
MYO6	2.00347	1.89554	0.0798913	0.0926002
GLRX2	2.12874	2.04018	0.0613043	0.0926037
GTPBP8	1.96224	2.05933	-0.0696739	0.0926597
SUPT7L	1.97931	2.07866	-0.0706522	0.0927742
TAGAP	2.03496	1.90241	0.0971739	0.0927923
IVNS1ABP	2.15285	2.06243	0.0619022	0.0928177
KPNA5	2.00521	1.89725	0.079837	0.0928724
PDE5A	1.98791	1.88585	0.0760326	0.0929328
CCSER1	1.97418	1.87001	0.0782065	0.0931078
C5orf30	1.93187	1.99278	-0.0447826	0.0932192
ANKRD7	2.06337	1.98559	0.0554348	0.0933375
IAH1	1.93522	2.03465	-0.0722826	0.0933396
MTMR11	1.98446	2.1774	-0.133859	0.0933503
TRPC7	1.95206	2.01816	-0.0480435	0.0934793
C7orf60	2.06158	1.98499	0.0546196	0.093524
EBF1	1.9369	2.00121	-0.0471196	0.0936201
WBP1	1.96564	2.182	-0.150652	0.0939319
LOC154449	2.00173	1.87001	0.0982065	0.0939488
LOC440982	2.09036	2.00543	0.059837	0.0939675
PCDHGA6	1.94363	2.00483	-0.0447283	0.0941916
MRPL1	1.97247	1.87113	0.076087	0.0942591
DOCK2	1.91521	2.03772	-0.0894565	0.094396
PCDHGB4	1.94363	2.00543	-0.045163	0.0944313
NLRC4	1.92352	1.99819	-0.0549457	0.0944572
LOC100996249	1.92519	2.06991	-0.104565	0.0944761
ITGB5	1.94868	2.02365	-0.0544565	0.0945216
PCDHGC5	1.92853	2.02548	-0.0707609	0.0945389
SFXN1	1.87742	1.99819	-0.0899457	0.0945511
SYNPO2	1.97931	1.88188	0.0728261	0.0945523
MIR8082	1.89376	1.65914	0.190815	0.0945555
MIR548B	2.0958	1.83982	0.187935	0.0946115
MIR4689	2.25793	1.97128	0.19587	0.0946539
CETN4P	2.06337	1.90585	0.114565	0.0947669
SIL1	1.91687	1.9826	-0.0486413	0.0947889
ATP6V1G2	1.77615	2.12554	-0.259076	0.0948307
MOV10	1.9302	2.01695	-0.0634239	0.0948913
SHPRH	1.99654	1.88756	0.0809783	0.0948995
COQ2	1.97418	1.86944	0.0786413	0.0948995
POPDC2	2.00173	2.0643	-0.0444022	0.0949027
SMYD1	1.95376	2.01816	-0.0467935	0.094938
F11-AS1	1.96224	1.85765	0.0790217	0.0950205
MMS22L	2.01566	1.90413	0.0821196	0.0951618
TMEM213	2.08855	1.97425	0.0811957	0.0951902
PSMB1	1.97418	1.85597	0.0890761	0.0952038
ZSCAN31	1.98103	2.08116	-0.0711413	0.0952068
FGB	2	1.85821	0.106087	0.0952972
ANKRD50	1.99481	1.88245	0.0836413	0.095384
ATP10B	1.94194	2.0006	-0.0429348	0.0954848
LCA5	2.00868	1.8984	0.0814674	0.095598
STK16	1.94868	2.09059	-0.101413	0.0956406
PABPC1P2	1.90528	2.03527	-0.0952174	0.0958081
PSPH	1.92186	2.05437	-0.0961957	0.0959145
FOXP2	2.08132	1.99398	0.0618478	0.0959151
PPP2R2B-IT1	1.88557	2.01999	-0.0993478	0.0961712
YWHAQ	1.92186	2.00664	-0.0622826	0.0962464
LOC151484	1.93355	2.03037	-0.0704891	0.0963752
KCTD16	1.91853	1.99278	-0.0547826	0.0964142
MIR6734	1.85157	2.09375	-0.177337	0.0965105
TGOLN2	1.91853	2.02609	-0.0786957	0.0965868
GMNC	2.13428	1.99819	0.0950543	0.0966147
KALRN	1.95884	2.01999	-0.0443478	0.0968292
PTBP2	2	1.91968	0.0591304	0.0968292
NUDCD2	1.8823	2.00121	-0.0883696	0.0970546
NSUN5	1.94026	2.15326	-0.150272	0.0970583
RWDD4	1.93522	1.82601	0.0838043	0.0970893
FGF5	2.00173	1.88699	0.085163	0.0973079
NREP-AS1	1.95376	2.01756	-0.0463587	0.0973402
CD96	1.98103	2.04757	-0.047663	0.0977145
OR2T33	2.24622	2.03343	0.143587	0.0977949
HMGN3	2.02968	1.91506	0.0838587	0.0979352
SLC7A11-AS1	1.9776	1.87622	0.0759239	0.0980649
LOC100507557	2.0174	1.91045	0.078587	0.0981
DDX60L	1.96905	1.87848	0.0679348	0.098166
SPDYE5	1.92352	2.06368	-0.101467	0.0982375
UBQLN4	2.00173	2.17675	-0.120924	0.0984131
LPIN1	1.96905	2.04202	-0.0525	0.0984411
HUS1B	2.18859	1.93829	0.175217	0.0986487
TET2	1.96905	1.87339	0.0718478	0.0989176
IL15	1.99827	1.89668	0.0752717	0.0990432
MIR9-1	2.01391	2.34284	-0.218261	0.0991275
PCDHGA5	1.94531	2.00422	-0.0430435	0.0991555
SNX14	1.99481	1.90642	0.0653804	0.0991818
KDM7A	2.1269	1.99338	0.0935326	0.0992153
RFX8	1.97931	2.03527	-0.0402174	0.0992275
FER1L5	1.94026	2.02182	-0.0594022	0.0993623
ZNF76	1.94531	2.04695	-0.0734783	0.0995083
TMEM108	1.96564	2.02365	-0.0419565	0.0995872
TRIM24	2.05979	1.96475	0.0681522	0.0997606
DNAJB14	1.97076	1.86663	0.0783152	0.099871
GYPA	1.99481	1.87961	0.0858152	0.10008
STPG2	1.97247	1.87113	0.076087	0.100087
LCE2D	2.07412	2.27741	-0.134891	0.100379
MIR196B	1.86768	2.21513	-0.246141	0.100418
GGCX	1.93522	2.04572	-0.0801087	0.100499
MIR4271	1.69056	1.93071	-0.19163	0.100525
RNGTT	1.99481	1.88984	0.0779891	0.10084
SH3PXD2B	1.91355	2.03527	-0.0889674	0.101181
LRRC73	1.9302	2.16106	-0.162989	0.1012
CDC42SE1	1.94868	2.14096	-0.135761	0.101207
LINC01127	2.01915	2.15521	-0.0940761	0.10126
PIP	2.1049	1.9994	0.0741848	0.101264
HIST1H1A	1.87092	2.16367	-0.209728	0.101283
LINC01144	1.82766	2.0133	-0.139565	0.101304
AHI1	2.00868	1.9093	0.0732065	0.101393
ALDH5A1	1.93858	2.01391	-0.055	0.101655
RWDD1	2.02265	1.91449	0.0792935	0.101729
THEMIS	2.02968	1.92316	0.0777717	0.101791
HNRNPA2B1	1.8954	2.09122	-0.141848	0.101818
TCERG1	1.89212	1.96653	-0.0556522	0.101846
LINC00574	2.04379	1.89897	0.106033	0.101916
CASP6	1.97076	1.85709	0.0857065	0.102001
RGPD2	1.92519	2.00422	-0.0580435	0.102109
LOC101928537	1.90693	1.98559	-0.0583152	0.102417
ZBED3-AS1	1.92686	1.99819	-0.0524457	0.102422
CFAP44	1.96054	2.0267	-0.0478804	0.102585
PLB1	1.96735	2.0488	-0.0585326	0.102607
C6orf48	1.86607	2.12489	-0.187391	0.102749
HPGD	2	1.88585	0.0847826	0.102795
DDX11L2	1.8954	2.08054	-0.134457	0.102845
SNX4	1.91355	1.97306	-0.0441848	0.102895
MZB1	1.91687	2.1064	-0.136033	0.102956
KCNIP1	1.94194	2.0643	-0.0881522	0.103003
IQCJ	2.12321	2.03834	0.0588587	0.103038
FBXO30	2.01217	1.89554	0.0861413	0.103405
CLDN3	1.92853	2.21647	-0.200761	0.103419
ATP6V0E1	1.87092	2.00241	-0.0979891	0.103512
LRRC70	1.94026	2.04757	-0.077663	0.103562
TAAR2	2.0209	1.90528	0.085	0.103839
LOC100507639	2.01217	1.87848	0.0991848	0.10387
JAKMIP2-AS1	1.90198	1.97544	-0.0546739	0.103915
RHBDD1	3.5247	2.04634	0.784457	0.103938
LINC00690	2.07232	1.95001	0.0877717	0.104043
DSE	2.0174	1.91449	0.0755435	0.104078
EXOC1	2	1.90012	0.073913	0.104081
CREBRF	1.86122	1.98499	-0.0928804	0.104093
TFAP2B	1.93522	2.00362	-0.0501087	0.104414
GCM2	1.92186	2.1007	-0.12837	0.104447
CASP2	2.04026	1.97365	0.0478804	0.104474
DDO	2.05623	1.93595	0.0869565	0.104537
MIR4257	1.92686	2.26236	-0.231576	0.104588
PLN	2.02968	1.922	0.0786413	0.104645
MIR5702	4.32065	2.21246	0.965598	0.1049
DHX36	2.08313	1.99879	0.0596196	0.104988
CFLAR	1.947	2.0127	-0.0478804	0.105181
TFB1M	2.0174	1.91564	0.0746739	0.105381
PPP3CA	1.98446	1.88131	0.0770109	0.10558
STK19	1.90693	2.1007	-0.13962	0.105616
IL2	2.04026	1.92258	0.0857065	0.105904
SLC12A8	1.95884	2.02243	-0.046087	0.106005
CCNC	1.99654	1.89554	0.0748913	0.106175
UBN2	2.08313	1.98499	0.0696196	0.106306
LOC100507462	1.98103	1.87735	0.0775543	0.10632
NMBR	2.00173	1.8887	0.0838587	0.106334
TNFSF10	2.19048	2.05128	0.0947283	0.106514
LOC100506272	1.97418	1.8717	0.0769022	0.106706
LINC01012	1.91355	2.01391	-0.07375	0.106916
SUMF2	1.88067	2.02548	-0.107011	0.106964
DOCK10	2.40953	2.00483	0.265272	0.106986
BTN2A1	1.96564	2.06306	-0.0697826	0.107134
TLL1	1.9776	1.87509	0.0767935	0.107281
PCYOX1L	1.91687	2.02853	-0.0816848	0.107364
LRIT3	1.97589	1.87565	0.0751087	0.107408
IRS1	3.97926	2.05437	0.953804	0.107422
SAP30L-AS1	1.94026	2.00543	-0.047663	0.107489
NHLH1	2.01915	2.18529	-0.114076	0.107546
FGF18	1.92019	2.06368	-0.103967	0.107557
SHE	1.94363	2.14032	-0.139076	0.107589
MED18	1.78695	1.90585	-0.0929348	0.107611
MIR6811	2.21722	1.9612	0.177011	0.108242
NCR3	1.96735	2.36555	-0.265924	0.108297
LINC00152	1.96054	2.03895	-0.0565761	0.108479
RNF130	1.87905	2.00604	-0.0943478	0.108578
TRIM39-RPP21	1.93858	2.13324	-0.138043	0.108617
PDIA5	1.98618	2.05375	-0.0482609	0.108664
LRRC39	2.03496	1.93712	0.071087	0.108698
KCND2	2.09036	2.00483	0.0602717	0.108724
LHFPL3-AS1	2.16407	2.02548	0.0954891	0.108798
TRPC1	2.07772	1.97187	0.0754348	0.108847
OR14J1	2.47298	2.01877	0.292772	0.109
POLR1C	1.89376	2.01209	-0.0874457	0.109132
SQSTM1	1.8872	2.02853	-0.104185	0.109242
CSF2	1.88557	2.13259	-0.177609	0.109328
ZBTB9	2.2019	2.00664	0.133967	0.109637
ITK	1.93355	1.99398	-0.0444022	0.11001
USP53	1.96564	1.87509	0.0680435	0.110061
ECT2	2.19048	2.04942	0.0960326	0.11008
MCCD1	1.64861	2.75772	-0.742228	0.11013
EIF2AK1	1.90033	2.07928	-0.129837	0.110135
IK	1.92686	2.00422	-0.0567935	0.110353
PTPRK	2.02265	1.92258	0.0732065	0.110356
CPB1	2.09398	1.99518	0.0697283	0.110457
TIGIT	1.97931	2.04018	-0.0436957	0.110501
MFAP3	1.9302	2.01634	-0.0629891	0.110523
DOCK4	2.05979	1.98618	0.0525	0.110599
WBSCR22	1.98103	2.13903	-0.110707	0.110654
SERINC5	1.90528	1.9689	-0.0473913	0.110745
LYSMD3	1.91521	1.97842	-0.0468478	0.110902
GPR126	2.02968	1.92548	0.0760326	0.110924
SLC39A8	1.99654	1.8944	0.0757609	0.111226
COPS4	1.96394	1.85933	0.0789674	0.111242
RNF150	1.98103	1.88699	0.070163	0.11131
APBB3	1.94194	2.02853	-0.0629348	0.111514
BBS7	1.96735	1.86494	0.0771196	0.111515
LOC153910	2.01915	1.91276	0.0780978	0.111639
CD8A	1.95206	2.02914	-0.0558696	0.111654
RETSAT	1.98791	2.09122	-0.0730978	0.111655
GTF3C2	1.90693	1.99098	-0.0622283	0.111661
MIR6780B	1.81819	2.09817	-0.20663	0.111663
BTLA	1.96564	2.03281	-0.0484783	0.111715
DNAJC30	2	2.20182	-0.138696	0.11186
MIR4435-1	1.94194	2.24132	-0.206848	0.111916
IGFBP1	1.98963	2.15391	-0.114457	0.111941
MAB21L2	1.99481	1.83097	0.123641	0.111999
CDHR2	1.92519	2.04819	-0.0893478	0.112033
PCAT4	1.98446	1.87905	0.07875	0.112069
MGAT5	1.98618	2.03956	-0.0382609	0.112256
UGT2A2	1.97931	1.87565	0.0776087	0.112421
PCDHGB3	1.94531	2.00422	-0.0430435	0.112554
CFC1	1.98618	2.07866	-0.0656522	0.112878
TFAP2A	1.90033	2.02548	-0.0920109	0.112983
STOX2	1.97418	1.87678	0.0729891	0.113053
MIR4275	2.00868	1.75533	0.194511	0.113181
C3orf58	2.07952	1.98081	0.070163	0.113377
ADH7	1.98963	1.88075	0.0811957	0.113388
FLJ42351	1.96735	2.16693	-0.139402	0.113501
NHP2	1.88557	2.04079	-0.11413	0.113773
ETV7	1.96224	2.05251	-0.0648913	0.113783
MREG	1.93355	2	-0.04875	0.113827
RCHY1	1.98446	1.87791	0.0796196	0.113991
ADRA1B	1.94194	1.99879	-0.0416304	0.113999
SH3RF3-AS1	1.89704	2.14549	-0.177554	0.114006
SRP72	1.96224	1.86494	0.0733696	0.114009
SCOC	2.00173	1.89954	0.0755978	0.114011
CGN	2.01042	2.13388	-0.0859783	0.114119
LINC01207	1.9369	1.84038	0.07375	0.114219
LOC102546294	1.92186	2.0006	-0.0579348	0.114233
ARHGAP24	1.9776	1.88075	0.0724457	0.114339
LOC401134	1.99654	1.89611	0.0744565	0.114341
MIR5692C1	3.8738	2.2339	0.794185	0.114451
PPM1G	1.90858	1.982	-0.0544565	0.11456
RNF175	2.00173	1.89725	0.077337	0.114788
IL36A	1.91853	2.13195	-0.152174	0.114834
LINC00488	1.92186	2.04449	-0.0892391	0.11484
AGBL3	2.04734	1.97425	0.0524457	0.114939
NKAPL	1.81347	2.03037	-0.162989	0.11552
BTC	2.00347	1.89155	0.0829348	0.115639
XXYLT1-AS1	1.91853	2.14549	-0.161304	0.11564
HADHA	1.93355	2.01999	-0.0630978	0.11574
SKIV2L	1.858	2.08996	-0.169728	0.11575
LOC101929694	1.97247	2.05685	-0.0604348	0.116017
EIF2B4	1.88067	1.98918	-0.0809239	0.116368
MIR553	1.8119	2.11276	-0.22163	0.116374
LHFPL5	1.91853	2.00664	-0.0647826	0.116384
NELFE	1.92186	2.11276	-0.13663	0.116534
PPAT	1.97418	1.86719	0.0803804	0.116595
CAPZA2	2.0958	1.99879	0.0683696	0.116598
TIFA	1.99827	1.87848	0.0891848	0.116627
CAMK2D	1.97589	1.87791	0.0733696	0.116783
SENP7	1.94194	2.00543	-0.046413	0.116811
LAMA2	2.0209	1.92316	0.0715217	0.116898
C5orf56	1.96224	2.02975	-0.0488043	0.117163
DOCK4-AS1	2.09762	2.00422	0.0657065	0.117172
ACP1	1.93858	2.01027	-0.0523913	0.117235
JAKMIP2	1.92853	2.00241	-0.0542391	0.117259
GUF1	2.03144	1.9116	0.0877174	0.117464
WTAP	1.98963	1.88075	0.0811957	0.117513
LOC101928036	2.09217	1.98978	0.0723913	0.117545
CASR	1.97589	2.03895	-0.0453261	0.117604
CNBP	1.87254	1.95236	-0.0602174	0.11763
MIR29B1	2.16407	1.91795	0.174185	0.117664
HIST1H2BC	1.8119	2.04079	-0.17163	0.117801
MIR564	1.81033	2.33509	-0.367228	0.117836
NDNF	2.00521	1.90241	0.0759239	0.117858
GRM6	1.90858	2.0643	-0.113152	0.117962
GOLIM4	2.20572	2.06928	0.0921196	0.118029
HMCES	1.90033	1.98439	-0.0624457	0.118029
RUFY3	1.96054	1.86213	0.0742935	0.118062
SPRR2F	2.32141	2.07866	0.159348	0.118087
CNNM3	1.99827	2.08808	-0.0634239	0.118335
RNF144A-AS1	1.9776	2.08933	-0.0792935	0.118381
VAMP5	1.99481	2.13131	-0.0954891	0.118412
SP8	1.9369	2.18332	-0.172772	0.118561
DNAJB9	2.08855	1.982	0.0755435	0.118638
MIR3125	1.90693	2.15976	-0.17962	0.118661
CMBL	1.9302	2.02365	-0.0682065	0.118829
LOC285593	1.90528	2.04942	-0.105217	0.119147
MIR181A1HG	2.09762	2.02853	0.0483152	0.119333
ARMC2-AS1	2.01042	1.88699	0.091413	0.119371
EFR3B	1.92686	2.00483	-0.0572283	0.119387
DFNB59	1.90363	2.00121	-0.0721196	0.119496
ZFP42	1.96905	1.84816	0.091413	0.119498
C4orf22	1.98446	1.88642	0.0730978	0.119636
SCAF8	1.99308	1.8887	0.0776087	0.119674
ABCF1	1.85639	1.99038	-0.100543	0.119686
HMHB1	1.92519	2.01452	-0.0654348	0.119821
PCDHGB1	1.947	2.00302	-0.0409239	0.119918
SGCD	1.94363	1.99518	-0.0377717	0.120217
UCP1	1.99827	1.87396	0.092663	0.120223
PNISR	1.98446	1.88528	0.0739674	0.12024
SESN1	2.00694	1.9116	0.0702174	0.120255
PCDH12	1.95714	2.05189	-0.0682065	0.12031
PTTG1	1.91189	2.04819	-0.0993478	0.120419
LOC93432	2.07772	1.99098	0.0615217	0.12046
ZSCAN9	1.947	2.05189	-0.0757065	0.120623
CXCL2	2.01217	1.87622	0.100924	0.12065
GRK6	1.94868	2.1134	-0.117065	0.120978
C3orf43	1.93858	2.05437	-0.0836957	0.121065
EXOSC9	1.96735	1.85821	0.082337	0.121103
CFC1B	1.99481	2.08556	-0.0641848	0.121134
DNAJC18	1.9369	2.00483	-0.0497283	0.121332
SF3B6	1.92352	2.03465	-0.0810326	0.121347
INPP4B	1.97931	1.88358	0.0715217	0.121356
SOD2	1.99308	1.88472	0.0806522	0.121575
FILIP1L	1.96054	2.02853	-0.0491848	0.121667
MAPRE3	1.95376	2.03343	-0.057663	0.121843
MYH15	1.99135	2.05871	-0.0479891	0.121898
SRSF7	1.89212	1.98978	-0.0726087	0.122024
LOC100505716	1.91023	2.03649	-0.092337	0.122067
LOC284661	2.04026	1.92432	0.0844022	0.122095
TGFA-IT1	1.9302	2.08305	-0.109946	0.122355
GOPC	2.0209	1.91968	0.0741304	0.122404
PDLIM5	1.96735	1.87509	0.0692935	0.122652
FAM13A	1.95884	1.86888	0.0678261	0.122661
MIR933	1.80719	2.06181	-0.190163	0.122868
LOC101929064	1.96394	1.86494	0.0746196	0.122897
NFKBIZ	1.94531	2.02609	-0.0586957	0.122902
C4orf29	1.95545	1.86045	0.0718478	0.123009
CSTA	1.92019	2.00302	-0.0609239	0.123361
RFX6	2.02265	1.91506	0.0788587	0.123451
SLC16A1-AS1	1.87254	1.96061	-0.0663043	0.123479
ARFIP1	1.96905	1.87678	0.0692391	0.123597
HMP19	1.92853	2.02853	-0.0729348	0.123799
DCHS2	1.97589	1.88245	0.0698913	0.123868
MIR4773-1	1.73357	1.99098	-0.199728	0.123871
MIR4773-2	1.73357	1.99098	-0.199728	0.123871
LOC100132735	2.00521	1.90355	0.0750543	0.124038
OR4F16	2.2019	1.97782	0.154837	0.124074
OR4F3	2.2019	1.97782	0.154837	0.124074
MAN1A2	2.10307	2.00785	0.0668478	0.124248
ZNF92	1.94194	2.07178	-0.0933696	0.124359
NFKB1	1.96564	1.87848	0.0654348	0.124382
SNAP91	2.01915	1.92432	0.0694022	0.12443
LINC01088	1.98446	1.88984	0.0704891	0.124542
NAF1	1.9776	1.87622	0.0759239	0.124551
KLHL41	2.0209	1.94063	0.0584783	0.124593
ARHGEF38	1.9776	1.88528	0.0689674	0.124841
LOC101928539	1.90363	1.99699	-0.0690761	0.124997
UGT2A3	2.01566	1.90069	0.0847283	0.125107
ATP8B2	1.99481	2.13002	-0.0946196	0.125207
C3orf36	1.88394	2.06057	-0.129293	0.125211
ST7L	1.9369	2	-0.04625	0.125319
SLC41A3	1.95376	2.01573	-0.0450543	0.125323
CSN3	1.9776	1.88075	0.0724457	0.125538
SPRR2G	1.91687	2.14807	-0.164293	0.125637
HCG8	1.72758	2.19917	-0.348207	0.125768
LSM6	1.95206	1.86326	0.0671739	0.125804
MIR6720	1.84837	2.34284	-0.342011	0.125838
SRGAP2-AS1	1.97247	2.02304	-0.0365217	0.126041
KCNIP3	2.01391	2.11276	-0.0691304	0.126197
LOC442028	1.99308	2.03834	-0.0323913	0.126205
RSPO3	2.04202	1.93829	0.0752174	0.126379
CTD-2201E9.1	1.947	2.05995	-0.0813587	0.12651
SLC9C1	1.96905	2.03711	-0.0490217	0.126671
EFNA1	2.02792	2.24335	-0.145652	0.126709
UBLCP1	1.93522	2.00543	-0.051413	0.126779
HSPB3	1.92853	2.13388	-0.145978	0.126916
ACPP	1.95714	2.01513	-0.0421196	0.126945
ANKRD33B	1.95037	2.04018	-0.0649457	0.127078
PXDC1	1.95884	2.08054	-0.0869565	0.127144
ACTB	1.91023	2.1774	-0.188859	0.127358
UNC5CL	1.97418	2.07053	-0.06875	0.127386
ANKRD55	1.92186	1.98618	-0.0475	0.127485
CLEC5A	2.08674	1.99038	0.0682065	0.127548
PIAS3	2.02441	2.13452	-0.076413	0.127779
GJA1	1.96394	1.86326	0.0759239	0.127824
NPY6R	1.94026	2.06057	-0.0867935	0.127826
DGKI	2.05445	1.98081	0.052663	0.127983
FLJ20518	1.93187	2.03527	-0.0752174	0.128043
ENPEP	1.97589	1.87622	0.0746739	0.128081
PDGFC	1.98275	1.88756	0.0709783	0.128127
HLA-E	1.79471	2.02304	-0.172772	0.12814
BCKDHB	2.00347	1.90528	0.0725	0.128206
SLC10A7	1.97589	1.88131	0.0707609	0.12832
TMEM144	1.99135	1.89611	0.0707065	0.12839
POU5F1P4	1.92519	2.10577	-0.129348	0.128546
SPACA1	2.00347	1.89783	0.0781522	0.128631
LCT	1.95884	2.0267	-0.0491304	0.128802
FBXW11	1.8872	2.00906	-0.0902717	0.128882
LOC101929717	1.9776	2.06057	-0.0592935	0.12902
FRG2C	1.93355	2.03649	-0.074837	0.129099
HIST1H3I	1.88557	2.09312	-0.150652	0.129225
SCAMP3	2.01391	2.16889	-0.106957	0.129324
PPIL6	2.02441	1.91276	0.0818478	0.129331
PCDHGA1	1.947	2.00181	-0.0400543	0.1294
HTR1B	2.11038	1.94238	0.119674	0.129527
ANKS1A	1.95545	2.03404	-0.0568478	0.129558
POLR2B	1.94194	1.8515	0.0688043	0.129702
C5orf52	1.87742	1.96712	-0.067337	0.12991
ING5	1.86607	1.95412	-0.0665217	0.12992
TMEM127	1.95037	2.02792	-0.05625	0.129931
TRMT10A	1.98963	1.87283	0.0872826	0.130046
IGFBP5	1.95545	2.03465	-0.0572826	0.130272
RGS18	2.14726	2.05809	0.0611957	0.130534
PTPLB	1.95884	2.0206	-0.0447826	0.130549
AFF4	1.91853	1.97961	-0.0452174	0.130572
NXPE3	1.96905	2.03159	-0.0451087	0.130723
LINC00887	2.05979	2.14549	-0.0588043	0.130984
CEP41	2.04911	1.96357	0.0615217	0.131266
LRRC66	1.97247	1.87339	0.0743478	0.1313
ST3GAL6	1.95884	2.02121	-0.0452174	0.131335
ALG1L	1.94194	2.0206	-0.0572826	0.13138
HOXD11	1.91853	2.13452	-0.153913	0.131386
CYP2U1	1.96394	1.85262	0.0841848	0.131447
PRSS16	1.93522	2.01999	-0.0618478	0.13162
PTPN13	1.96905	1.87565	0.0701087	0.131691
EMX1	1.97076	2.14161	-0.119946	0.131804
TBC1D32	2.00521	1.90528	0.07375	0.13194
FAT1	1.96394	1.87283	0.0685326	0.132131
HTR1E	2	1.90528	0.07	0.13227
PDLIM7	1.9302	2.12042	-0.135598	0.13237
C6orf132	1.94531	2.04942	-0.0752174	0.132457
PEX7	2.00694	1.91276	0.0693478	0.132748
EPHA5	1.98791	1.88301	0.0782065	0.132822
TMEM14E	2.24233	2.05375	0.126739	0.132906
ASB5	1.98791	1.86888	0.0890761	0.133032
MIR5581	2.2697	1.97544	0.200326	0.133095
HDAC2	2.01915	1.91391	0.0772283	0.133116
SMARCA5	1.97076	1.88075	0.0674457	0.133147
A4GNT	2.09036	1.98858	0.0720109	0.133183
MIR4435-2	1.95037	2.23323	-0.19538	0.133384
ZNF142	1.92519	2.00906	-0.0615217	0.133457
MAP3K19	1.9302	2	-0.05125	0.133471
SMAD5-AS1	1.91355	2.01391	-0.07375	0.133559
HOTTIP	1.98275	2.16562	-0.127283	0.133585
TMEM42	1.89048	2.08808	-0.143424	0.13361
SMN2	1.86607	1.9342	-0.0517391	0.133669
MIR488	2.32947	2.03834	0.192609	0.133712
FIP1L1	1.95376	1.86326	0.0684239	0.133837
AIMP2	1.92352	2.09059	-0.120163	0.133857
FAM160A1	1.97076	1.88188	0.0665761	0.133925
PLSCR4	2.09762	2.01634	0.0570109	0.134019
MORC1	1.97247	2.03281	-0.0434783	0.134021
CISD2	1.9776	1.87961	0.0733152	0.134095
LOC100289230	1.85157	2.01088	-0.119076	0.134105
FAM49A	1.95884	2.03772	-0.0569565	0.134272
LINC00886	2.09943	2.02304	0.0534783	0.134357
SERTAD2	1.95714	2.02731	-0.0508152	0.134372
PBOV1	2.13613	1.96298	0.121957	0.134469
AIMP1	1.9776	1.86607	0.08375	0.134517
CCND3	1.94531	2.0206	-0.0547826	0.134534
PCDHGA4	1.94868	2.00302	-0.0396739	0.134566
SEMA5B	1.99135	2.06306	-0.0510326	0.13474
TFAP2A-AS1	1.89212	2.04695	-0.113478	0.134982
KLF11	1.90198	2.01391	-0.0825	0.134992
C6orf106	1.9302	1.9994	-0.0508152	0.135171
OR10J5	2.33553	2.12489	0.136359	0.135195
ZBED8	1.93858	2.04202	-0.075	0.135475
GABRG2	1.94194	2.00604	-0.0468478	0.135605
STARD4	1.92519	2.01027	-0.0623913	0.135671
PLOD2	2.07053	2.00362	0.0473913	0.13582
LINC00882	1.96735	2.03343	-0.047663	0.135823
RSPH9	1.947	2.04572	-0.0713587	0.135897
TMEM185B	1.94531	2.05251	-0.0773913	0.136096
MTNR1A	2.01915	1.89897	0.0885326	0.136205
MIR3147	2.4158	2.07991	0.215978	0.136274
EPHA7	2.02616	1.92374	0.074837	0.136678
FTSJ2	1.90693	2.09375	-0.134837	0.136707
ANTXR2	1.97589	1.8944	0.0607609	0.136722
GPR87	2.09217	1.98379	0.0767391	0.136815
TRIM41	1.8693	1.9814	-0.0840217	0.136914
DKFZP434I0714	2.00521	1.86832	0.102011	0.137084
CENPW	2.01042	1.91564	0.0696739	0.137164
NR3C2	1.97931	1.88585	0.0697826	0.13733
LOC728554	1.84197	1.97484	-0.100489	0.137538
PRR15	1.947	2.1007	-0.10962	0.137555
LOC731157	1.73207	1.90528	-0.1375	0.13758
LOC101929555	1.97931	2.05871	-0.0567391	0.137658
ZNF300P1	1.90033	1.98678	-0.0641848	0.137823
CANX	1.87417	1.982	-0.0807065	0.137848
ELOVL4	2.01042	1.9116	0.0727174	0.137971
ADAMTS2	1.93187	2.05871	-0.0917391	0.138038
PTCD3	1.94868	2.0127	-0.0466304	0.138088
WNT2	2.07232	1.99218	0.0569022	0.138255
IGJ	1.98791	1.88699	0.075163	0.138316
MIR548G	1.96905	2.03465	-0.0472826	0.138384
GUCY1A3	1.98275	1.88075	0.0761957	0.13849
NCEH1	2.20381	2.0724	0.0886957	0.138547
CCT4	1.86122	2.02487	-0.121576	0.138645
RNF145	1.91853	1.99579	-0.0569565	0.138709
SSB	1.94194	1.9994	-0.0420652	0.138785
TRDN	2.0174	1.91853	0.0725	0.138829
ZBTB18	1.96735	2.10831	-0.099837	0.138864
L3MBTL3	2.01042	1.9116	0.0727174	0.138939
MTFR2	1.99481	1.88699	0.080163	0.139093
OTP	1.86607	1.96535	-0.0747826	0.139124
ST7-AS2	2.08855	2.00181	0.0611957	0.139209
LOC401312	1.98618	2.16367	-0.123478	0.139273
PHLDB2	1.96735	2.0267	-0.0428804	0.139314
C4A	1.97076	2.13324	-0.114293	0.139332
C4B_2	1.97076	2.13324	-0.114293	0.139332
C4B	1.97076	2.13324	-0.114293	0.139332
LOC100131289	1.86768	2.02426	-0.116141	0.139414
SIMC1	1.88557	1.99158	-0.078913	0.139506
GRM1	2.01915	1.91795	0.0741848	0.139559
APOA1BP	1.98618	2.17872	-0.133478	0.139622
LSM2	2.10672	1.97842	0.0906522	0.139627
RPS10-NUDT3	1.92519	1.98678	-0.0454348	0.139711
SEC24B	1.96394	1.86888	0.0715761	0.139787
STXBP5-AS1	2.01042	1.91679	0.0688043	0.139834
SRSF3	1.92186	2.01999	-0.0718478	0.139898
C1orf220	2.14726	2.06243	0.0581522	0.139925
TF	1.9776	2.04572	-0.0488587	0.139963
LINC01060	1.94868	1.85262	0.0729348	0.140077
SNORA26	2.26184	1.98618	0.1875	0.140295
PLGLA	1.90528	2.0969	-0.138261	0.140321
RHBG	2.0209	2.15781	-0.0945652	0.140327
B4GALT7	1.94868	2.11595	-0.118804	0.140327
LOC285626	1.94531	1.99759	-0.0382609	0.140504
KPNA1	1.94194	2.0006	-0.0429348	0.140599
PCDHGA3	1.947	2.0006	-0.0391848	0.140652
LOC440704	2.09398	2.02365	0.0492935	0.140859
HIST1H2BA	1.84038	1.98918	-0.112174	0.140868
OR9A2	2.34974	2.08368	0.17337	0.140938
TXNDC9	1.97931	2.03895	-0.0428261	0.140939
MIR7111	2.02616	2.33017	-0.201685	0.140976
PABPC4L	1.95206	1.81887	0.101957	0.14131
COL8A1	1.96735	2.03527	-0.0489674	0.141382
PCDHGA2	1.947	2	-0.03875	0.141409
TPO	1.93355	1.99759	-0.0470109	0.141609
CCZ1B	1.89212	2.06554	-0.126522	0.141683
RAB17	1.91853	2.02243	-0.076087	0.141823
ALG1L2	1.91189	1.99398	-0.0606522	0.141901
H2AFV	1.91355	2.09059	-0.127663	0.142016
DCK	1.94531	1.8515	0.0713043	0.142082
C6orf47	1.84517	2.17281	-0.235815	0.142159
STX7	2.00347	1.91045	0.068587	0.142172
FRG1	1.93522	1.8476	0.0668478	0.142415
HFE	1.94531	2.03772	-0.0669565	0.142568
NRSN1	1.96224	2.04572	-0.0601087	0.142593
C6orf58	2.03849	1.92955	0.0792391	0.142785
ARSJ	1.9776	1.88472	0.0694022	0.143094
KLHL8	1.96905	1.87283	0.0722826	0.143173
LINC01351	2.16033	1.99759	0.112989	0.143225
GDNF-AS1	1.98963	2.11595	-0.0888043	0.143237
PCDHGC4	1.93858	2.02365	-0.0619565	0.143254
PPP2R3A	1.94363	1.99038	-0.0342935	0.143574
PNPLA1	1.95714	2.03281	-0.0547283	0.14364
FBXL4	2	1.90988	0.0665217	0.143847
RNF14	1.90033	1.97425	-0.0550543	0.1439
LPAL2	2.02616	1.92955	0.0704891	0.143967
KIF3C	1.93355	2.00422	-0.0517935	0.144003
SPATA16	2.20763	2.0749	0.0894565	0.144055
FHDC1	1.97589	1.88472	0.0681522	0.144089
HLA-H	1.18612	2.48016	-1.06418	0.14414
SLC13A1	2.08493	2.00906	0.0534783	0.144187
UNC5A	1.94363	2.11022	-0.118641	0.144264
TMEM63B	1.96224	2.06554	-0.0740217	0.144471
MANBA	1.97418	1.8887	0.0638587	0.144524
TMEM209	2.01915	1.94297	0.0554891	0.14456
TBX18	2.03496	1.94883	0.0623913	0.144584
SMN1	1.86768	1.93362	-0.0500543	0.144704
OR2T34	2.17913	1.96475	0.149402	0.144713
COA5	1.94531	2.03527	-0.0652174	0.144773
MTHFD2L	1.98275	1.89383	0.0661957	0.144879
LINC00326	2.01915	1.92374	0.069837	0.144953
IL20RA	2.00868	1.91679	0.0675543	0.145047
LINC01393	2.07412	1.99158	0.058587	0.145094
TCF19	1.7593	2.01573	-0.196304	0.145095
DNMT3A	1.9369	2.03343	-0.070163	0.145105
TNFSF18	2.1622	2.05004	0.0768478	0.145162
ZNF138	1.947	2.04326	-0.0696196	0.145296
RALB	1.97076	2.03588	-0.0469022	0.1453
CXCL10	2.05445	1.91506	0.101359	0.145403
FGF2	1.96905	1.87905	0.0675	0.145415
GBX2	1.76082	1.98798	-0.175054	0.145489
GPRIN1	1.95037	2.11659	-0.117989	0.145748
LRRIQ3	2.02265	1.93537	0.0636413	0.145908
UBE3D	2.00173	1.92084	0.0595109	0.145909
PCNP	1.94868	2.01391	-0.0475	0.145926
GPN1	1.91687	1.99278	-0.0560326	0.145929
CHRND	1.94026	2.08556	-0.104185	0.146074
LOC101927123	1.95714	2.02731	-0.0508152	0.146223
LOC100507642	1.95037	2.13774	-0.132337	0.14652
FEZ2	1.96054	2.01999	-0.0430978	0.146537
LOC151475	1.92853	2.02426	-0.0698913	0.146643
GAB1	1.96735	1.87735	0.0675543	0.146704
LOC102546229	1.98103	1.87735	0.0775543	0.14707
DKK2	1.96905	1.88301	0.0644565	0.147093
MIR4793	2.05801	1.8134	0.182554	0.147707
TRIM52	1.86607	1.98918	-0.0921739	0.148048
TAB2	1.99481	1.90413	0.0671196	0.148072
LOC100128885	1.99654	2.07803	-0.0577174	0.148107
KCNG3	1.93522	2.00241	-0.0492391	0.148165
YIPF5	1.90033	2	-0.07375	0.148168
NEK11	1.96054	2.00483	-0.0322283	0.148181
ABCC10	1.94868	2.05375	-0.0757609	0.148188
NIT1	2.0332	2.18398	-0.103207	0.148255
PIFO	2.10125	1.99699	0.0734239	0.148277
VN1R5	1.97931	2.15131	-0.120217	0.148629
PHAX	1.90858	1.96475	-0.0418478	0.148651
PBX2	1.86607	2.0724	-0.151304	0.148656
SCTR	1.9776	2.02853	-0.0366848	0.148778
FAM161A	1.89048	2.04942	-0.116467	0.149085
RFC2	1.95376	2.10577	-0.108098	0.14912
GPATCH4	1.97247	2.11531	-0.10087	0.149121
RPL22	2.00521	1.89783	0.0794022	0.149302
SNCB	1.92853	2.08996	-0.115978	0.149405
GNPDA1	1.95545	2.02792	-0.0525	0.149433
WBSCR16	1.95206	2.08242	-0.0932609	0.149439
TBP	1.97076	1.85821	0.084837	0.149464
NKAIN2	2.00694	1.91218	0.0697826	0.149504
PCDHA13	1.94194	2.00241	-0.0442391	0.149509
CNOT4	2.04026	1.97068	0.0500543	0.149519
RNF149	1.94194	2.00362	-0.0451087	0.149524
KIAA2018	1.97247	2.03037	-0.0417391	0.149693
SF3B5	2.11404	1.91795	0.140435	0.149767
CKS1B	1.96735	2.15781	-0.133315	0.149828
MIR128-1	2.37841	2.10514	0.176087	0.149925
NRG2	1.96394	2.02548	-0.0445109	0.149942
SFTPB	1.95376	2.07428	-0.0863587	0.150048
MIR378E	1.87417	2.15131	-0.198967	0.15006
CLRN1-AS1	2.06515	1.97842	0.0619022	0.150067
SPDYA	1.91853	1.98021	-0.0456522	0.15036
S100A4	2.05445	2.23997	-0.124728	0.150439
SPHAR	1.96564	2.21113	-0.169783	0.15055
ELOVL6	1.96564	1.87678	0.0667391	0.150615
RSRC1	2.09762	2.02182	0.0530978	0.150627
HNRNPH1	1.8823	2.0206	-0.102283	0.150755
RPL34	1.98275	1.85765	0.0940217	0.150782
SAP30	2.01915	1.88358	0.100272	0.150797
NPM1	1.90858	2.02182	-0.0831522	0.150871
NSA2	2.00521	1.93304	0.0528804	0.151105
PCDHB9	1.8823	1.98678	-0.0779348	0.151111
DNM3OS	2.12321	2.03465	0.0614674	0.151276
B3GALT2	2.15099	2.0322	0.0819565	0.151383
LOC101927314	2.01042	1.91737	0.0683696	0.151471
TNRC18	1.93522	2.09943	-0.1175	0.151752
RAPGEF6	1.92853	1.98439	-0.0411957	0.151784
LOC101927237	1.96054	1.82656	0.10212	0.151848
HAND2	2.0332	1.86269	0.126359	0.151924
CCNB1	1.87254	1.95001	-0.0584783	0.151981
DNPH1	1.89212	2.04757	-0.113913	0.152006
TRMT11	2.01042	1.91391	0.0709783	0.152117
NOX3	2.00347	1.9116	0.0677174	0.152138
RAPGEF4-AS1	1.97076	2.05437	-0.0599457	0.152263
GTF2H5	1.97076	1.87452	0.0722283	0.152352
ZXDC	1.98103	2.06057	-0.0567935	0.152439
EIF2AK3	1.95206	2.0006	-0.0354348	0.152482
TRIB2	1.96054	2.04141	-0.0583152	0.152547
ORC3	1.97589	1.87848	0.0729348	0.152569
ZNF890P	1.90033	2.06679	-0.121141	0.152576
TSPYL4	2.06158	1.90642	0.11288	0.1526
BMPR1B	1.96564	1.88075	0.0636957	0.152625
EYA4	2.01217	1.92316	0.0652717	0.152703
MEI4	1.99308	1.90012	0.068913	0.152778
DCBLD1	2.01217	1.92316	0.0652717	0.153168
REV3L	1.98103	1.89554	0.0636413	0.15319
CTD-2270F17.1	1.94531	2.06928	-0.0891304	0.15332
MRPS22	2.10672	2.0133	0.0654348	0.153389
POT1	2.07952	1.9994	0.0566848	0.153513
PLAGL1	2.0174	1.91795	0.0729348	0.153781
SULT1E1	1.96735	1.86157	0.0797283	0.153876
INTU	1.95376	1.87226	0.0614674	0.153904
KCMF1	1.93355	1.99819	-0.0474457	0.153909
CCHCR1	1.95037	2.06554	-0.0827717	0.153911
TMEM217	1.94531	2.02792	-0.06	0.154145
CLEC4F	1.94531	2.07553	-0.0934783	0.154221
CHTOP	1.99654	2.10958	-0.0794565	0.154268
PDZK1	1.98103	2.05871	-0.0554891	0.154303
CCDC80	1.97076	2.04634	-0.0542935	0.154317
AASS	2.06694	1.98379	0.0592391	0.154549
NPFFR2	1.97418	1.88642	0.0655978	0.154681
TOMM70A	1.95714	2.02304	-0.0477717	0.154741
MIR568	1.90693	2.13067	-0.160054	0.154781
LOC101928333	2.07053	1.98918	0.0578261	0.154871
SNORD2	2.24039	2.01452	0.153315	0.154891
MIR4281	1.7593	2.05313	-0.222826	0.155158
SLC25A4	2.04026	1.90355	0.100054	0.155177
SLC15A2	1.96054	2.0206	-0.0435326	0.15534
KLHL29	1.9776	2.05933	-0.0584239	0.155434
GFRA3	1.91355	1.97723	-0.0472283	0.155474
ISY1	1.90693	1.97723	-0.0522283	0.155525
COL25A1	1.96735	1.87905	0.06625	0.155582
F11	1.95884	1.86326	0.0721739	0.155585
TCHHL1	1.99481	2.19983	-0.141141	0.155683
IGFBP2	1.96224	2.03404	-0.0518478	0.15581
TMEM173	1.90033	2.01999	-0.0880978	0.155937
IFNGR1	2.0209	1.92896	0.0671739	0.156249
CPEB4	1.8954	2.00121	-0.0783696	0.156314
PRIMPOL	1.94363	1.8515	0.0700543	0.156372
PCDHB16	1.90033	2.00241	-0.0754891	0.156401
ASTL	2.01217	2.11978	-0.075163	0.156449
ARHGAP31-AS1	1.98791	2.05313	-0.0465761	0.156519
AK9	2.00521	1.91391	0.0672283	0.156535
MCCC2	1.92686	1.9826	-0.0411413	0.156714
SLC26A8	1.93858	2.00241	-0.0467391	0.15676
ATG3	1.97589	2.03465	-0.0422826	0.156906
HGC6.3	2.08493	1.84871	0.173478	0.156916
LOC101927053	2.01042	2.1045	-0.0659783	0.157048
USO1	1.95545	1.87113	0.063587	0.157108
GABBR1	1.8954	2.00362	-0.0801087	0.157257
STPG2-AS1	1.97076	1.88301	0.0657065	0.157401
HOXA3	1.95714	2.12425	-0.118207	0.157445
SLC4A4	1.9776	1.89269	0.0633152	0.157474
MECOM	2.20955	2.08808	0.0815761	0.15763
KNG1	2.09762	2.01877	0.0552717	0.157871
LOXL3	1.96394	2.11085	-0.104076	0.158013
ZNF273	1.94026	2.04449	-0.0754891	0.158038
HAAO	1.9369	2.02243	-0.062337	0.158042
SUMO1	1.89376	1.9612	-0.0504891	0.158098
C7orf73	2.09762	2.01695	0.0565761	0.15827
WDFY3-AS2	1.94026	1.85039	0.0684239	0.15846
UNC5C	1.97247	1.88358	0.0665217	0.158475
IDH1	2.03144	1.95825	0.0529348	0.158525
PISRT1	2.17535	2.00362	0.118641	0.158548
RAB6B	1.99135	2.06928	-0.0553804	0.15865
TSG1	2.00521	1.9047	0.0741848	0.159002
TMEM82	2.14913	1.94121	0.146793	0.159054
MIR4634	1.90528	2.23121	-0.227826	0.159185
KCNT2	2.09762	2.02609	0.0500543	0.159187
FKBP1B	1.92019	2.00483	-0.0622283	0.159295
KCNAB1	2.09036	2.02731	0.0441848	0.159357
IFT80	2.09762	2.01209	0.0600543	0.159475
ITPRIPL1	1.9369	2.08619	-0.10712	0.159485
FBXL21	1.91853	1.98499	-0.0491304	0.15958
ABRACL	2	1.89783	0.0756522	0.159673
GLMN	1.99135	1.92722	0.0472283	0.159872
FLJ43879	1.86607	1.97782	-0.083913	0.160107
MIR1229	1.8872	2.16889	-0.200707	0.160128
EGFEM1P	2.2019	2.07928	0.082663	0.160296
HOXA10	1.97589	2.15521	-0.125326	0.160319
ART3	1.97247	1.89098	0.0608696	0.160328
KIAA1549	2.06694	1.99038	0.0544565	0.16047
HDGF	2.00347	2.1702	-0.115326	0.160522
VKORC1L1	1.94531	2.06866	-0.0886957	0.160709
ANKRD17	1.95545	1.87396	0.061413	0.160719
FAM114A2	1.91521	1.99518	-0.0590217	0.160787
MIR29C	1.93522	2.19718	-0.183152	0.161155
LOC440910	1.97931	2.04141	-0.0445652	0.161352
PRDM5	1.9776	1.8887	0.0663587	0.161515
C5orf55	1.90198	2.14937	-0.176413	0.161803
MRPS18A	1.93355	2.01999	-0.0630978	0.161897
PTN	2.05623	1.98081	0.053913	0.161973
RCSD1	2.03672	2.08996	-0.0372283	0.162089
RAP1GDS1	1.95714	1.87001	0.0657065	0.162148
GLRB	1.96905	1.87509	0.0705435	0.162504
LOC102723824	1.97589	2.05561	-0.0570652	0.162761
NPHP3	1.947	2.00785	-0.0444022	0.162787
LOC644145	1.99827	1.8944	0.0770109	0.162834
PKD2L2	1.90528	1.97009	-0.0482609	0.162861
KPNA4	2.08674	2.01027	0.0538587	0.16287
SLAIN2	1.97247	1.89497	0.0578261	0.162913
CD200R1L	1.99654	2.0488	-0.0372826	0.162919
ABCF3	1.99827	2.10323	-0.0738587	0.163026
ADAMTS3	1.98103	1.89326	0.0653804	0.163152
RAD1	1.91521	2.03588	-0.0881522	0.163157
LOC728175	2.00173	1.89041	0.0825543	0.163431
INHA	1.93858	2.07991	-0.101522	0.163675
HSPE1-MOB4	1.91687	1.97009	-0.0395109	0.163731
LOC101929696	1.95037	2.11531	-0.11712	0.163816
MRPS24	1.90363	2.11022	-0.148641	0.163989
CDCA7	1.93355	2.01027	-0.0561413	0.164036
ING3	2.06515	1.99158	0.052337	0.16408
NFKBIL1	1.91023	2.13774	-0.162337	0.164086
PA2G4P4	2.14726	2.00967	0.0955435	0.164103
ISG20L2	1.98275	2.16171	-0.124674	0.164144
CMTR1	1.94026	2.01816	-0.0567935	0.164278
FAM92A1P2	1.95884	1.81832	0.107391	0.164296
SLC35F1	2.01217	1.92142	0.0665761	0.164376
PCDHA5	1.94868	2.00302	-0.0396739	0.164398
HLA-F	2.15846	2.50646	-0.215652	0.164449
UBE2B	1.90528	1.97604	-0.0526087	0.164516
GPRIN3	1.98963	1.90355	0.0638043	0.16467
KCNS3	1.95545	2.02853	-0.0529348	0.164764
TMEM150C	1.97076	1.88585	0.0635326	0.164778
CEP63	1.93355	1.98678	-0.0391848	0.164876
RPN1	1.89868	1.97663	-0.0580435	0.164906
NUP54	1.95545	1.86663	0.0670652	0.165039
PDCL3	1.9369	1.99639	-0.0436413	0.165069
MIR6165	1.90693	2.05995	-0.111359	0.165096
SDHAP3	1.9369	2.02182	-0.0619022	0.165169
LOC101926905	1.94531	2.00543	-0.043913	0.165191
CYSTM1	1.95206	2.01695	-0.0471739	0.165214
AGK	2.05801	1.99038	0.0482065	0.165234
LINC01179	1.96735	1.88018	0.0653804	0.165297
ME1	2	1.9249	0.0552174	0.165403
OR2W1	2.44105	2.06057	0.244457	0.165407
TSPAN12	2.07772	2.00121	0.0541304	0.165495
SNORD19	2.21722	1.97247	0.16875	0.165544
BASP1	1.93522	2.02609	-0.0661957	0.165587
MANEA	2.01566	1.91333	0.075163	0.165661
FUT9	2.00694	1.91333	0.068913	0.16584
PARP12	2.11587	2.01088	0.0734239	0.165945
KIAA1430	1.95545	1.86269	0.0701087	0.16598
SGMS2	1.96735	1.87961	0.0658152	0.166111
EGF	1.96905	1.88415	0.063587	0.166117
GALNT14	1.97247	2.02365	-0.0369565	0.166441
BRAF	2.03144	1.96772	0.0459783	0.166509
GJB7	1.9776	1.88927	0.0659239	0.166594
LOC730101	1.95206	2.05251	-0.0723913	0.166677
SEC22A	1.95714	2.01209	-0.0399457	0.166775
LRBA	1.99827	1.8717	0.0944022	0.167051
SAG	1.92019	1.982	-0.0457065	0.167234
TBXAS1	2.11038	2	0.0775	0.167478
PCDHA3	1.947	2.00121	-0.0396196	0.167602
ASPM	2.11587	2.04202	0.05125	0.167613
CLK1	1.92853	2.01148	-0.0607609	0.167648
ELDR	1.947	2.14355	-0.13875	0.167823
MUL1	1.82608	1.91737	-0.0703804	0.167926
ERICH3-AS1	2.02968	1.94472	0.0616848	0.168264
HEATR2	1.94194	2.09375	-0.108587	0.168291
TPI1P3	2.09217	1.95177	0.100217	0.168323
CLOCK	1.95376	1.86832	0.0645109	0.16849
LOC101926941	1.92019	1.97128	-0.0378804	0.168568
IP6K3	1.96394	2.07303	-0.0779891	0.168907
CFI	1.96054	1.8717	0.0669022	0.168926
C5orf58	1.8823	2.00362	-0.0901087	0.168942
PRMT9	1.94868	1.85989	0.0672826	0.168955
IBA57-AS1	1.96224	2.15586	-0.135761	0.168985
GYPC	1.97589	2.05189	-0.0544565	0.169082
TFEB	1.99308	2.09943	-0.075	0.169086
EIF3B	1.78231	1.95177	-0.131033	0.169096
LOC100128164	2.21146	2.09438	0.0784783	0.169211
ANKRA2	1.92853	1.99038	-0.0455435	0.169236
FREM3	1.9776	1.89326	0.0628804	0.169319
ASL	2.00347	2.14937	-0.101413	0.169328
C4orf45	1.95206	1.86719	0.0641304	0.169352
SMIM8	1.98446	1.89212	0.06875	0.169711
SMARCAL1	1.94531	2.00604	-0.0443478	0.169764
CCDC28A	1.97589	1.88415	0.068587	0.16989
LCE1B	2.34364	2.15911	0.118315	0.169991
CCNH	1.91521	1.982	-0.0494565	0.17002
LOC100506076	1.92853	2.0006	-0.0529348	0.17006
HIST3H2A	1.9776	2.2158	-0.164076	0.170092
SEMA4A	2.03849	2.17216	-0.0916304	0.170252
SPARCL1	1.947	1.86269	0.0638587	0.170263
ZNF292	1.97931	1.88358	0.0715217	0.170401
OR2T29	1.94026	2.08996	-0.107228	0.170422
LYPD8	1.92019	2.17609	-0.180489	0.170473
C4orf33	1.97589	1.88472	0.0681522	0.170699
GCLM	2.01042	1.94238	0.0496739	0.170819
MMD2	1.93187	2.07615	-0.103913	0.170907
MAPK10	1.96394	1.88075	0.0624457	0.171025
EFCC1	1.96905	2.07303	-0.0742391	0.17103
LINC00115	2.13243	1.93537	0.139891	0.171054
OPRM1	1.99654	1.90642	0.0666304	0.171077
LINC01226	2.04202	1.92548	0.0847826	0.171235
DDX60	1.95714	1.87791	0.0596196	0.171263
BTN3A1	1.9776	2.07428	-0.0688587	0.171336
RNF144A	1.96905	2.02365	-0.0394565	0.171385
HSPA1L	1.92519	2.10895	-0.131522	0.17141
LOC101927750	1.97589	2.13195	-0.109674	0.171492
TTC31	1.98275	2.12233	-0.0981522	0.171547
PMS2CL	1.89868	2.07428	-0.127609	0.171623
LOC728989	2.03496	2.17412	-0.0954348	0.171664
SYNE1	1.99308	1.90298	0.0667391	0.171785
MIR4436B1	2.04202	2.40074	-0.233478	0.171862
MIR4436B2	2.04202	2.40074	-0.233478	0.171862
ZNF184	1.94026	2.02243	-0.059837	0.17192
LYRM7	1.93355	1.99398	-0.0444022	0.172012
MROH2A	1.97418	2.04942	-0.0539674	0.172028
S100A3	2.04557	2.21981	-0.117935	0.172049
KIAA1407	1.96905	2.02609	-0.0411957	0.172082
SLC16A10	1.99308	1.907	0.0636957	0.172098
RUVBL1	1.94531	2.00543	-0.043913	0.172119
MIR548H3	2.00347	1.91391	0.0659783	0.172217
HES3	2.20572	1.95177	0.176467	0.172247
CCNT2	1.94026	2.00241	-0.0454891	0.172342
LPA	2.00347	1.91795	0.0629348	0.172363
THBS3	2.04557	2.21847	-0.117065	0.172384
ZGRF1	1.9369	1.84816	0.067663	0.172465
IL21-AS1	1.97589	1.89554	0.0598913	0.172505
MIR4439	3.19319	2.25555	0.501522	0.172633
ATP6V1C2	1.92186	2.00543	-0.061413	0.17267
FLJ16171	1.89704	1.99338	-0.0714674	0.17268
FLT4	1.91189	2.05747	-0.10587	0.17268
PARK7	1.98103	1.88301	0.0732065	0.172749
MKRN1	2.04026	1.95177	0.0639674	0.172764
TTC26	2.04379	1.96416	0.057337	0.172927
MAN1A1	2.00347	1.91218	0.0672826	0.173249
DDX59	2.04911	1.99458	0.038913	0.173317
LINC01279	2.01566	2.11404	-0.06875	0.173318
GGT8P	1.92519	2.01452	-0.0654348	0.173373
AFP	1.9776	1.88188	0.0715761	0.173439
MGAT1	1.93187	2.04202	-0.08	0.173502
LOC285074	1.947	2.0127	-0.0478804	0.173703
PIGC	2.12321	2.01756	0.0736413	0.17385
LRFN2	1.99827	2.06617	-0.0482065	0.174039
NMD3	2.1049	2.02243	0.057663	0.174056
PCDHA4	1.95037	2.00422	-0.0392935	0.174077
MCM9	1.99654	1.90183	0.0701087	0.174295
QKI	1.98103	1.8887	0.0688587	0.17452
LOC442132	1.93355	2.02548	-0.0670109	0.174567
TNPO3	2.0209	1.96061	0.0436957	0.174569
ADH1B	2.00173	1.90528	0.07125	0.174655
NAP1L5	1.99481	1.84983	0.108859	0.174693
BLACAT1	1.98791	2.12297	-0.094837	0.174733
MIR4436A	2.02441	2.23592	-0.14337	0.174801
STK32A	1.91853	1.97842	-0.0443478	0.17481
SLC45A1	2.00347	1.90069	0.0759783	0.174858
LINC01246	2.04557	1.95295	0.0668478	0.174902
CEP85L	1.98963	1.8984	0.0677174	0.175001
SMG5	2.03144	2.15781	-0.0870652	0.17502
FAM220A	1.92352	2.09185	-0.121033	0.175124
LINC00989	1.93187	1.84704	0.0647826	0.175155
NPY	1.9302	2.08305	-0.109946	0.175347
SLBP	1.8119	1.90241	-0.0703261	0.175358
ARHGAP26-AS1	1.94194	2.04079	-0.0716304	0.175392
LINC01277	1.99654	1.90872	0.0648913	0.17558
UROC1	1.96905	2.06928	-0.0716304	0.175666
SLC22A2	2.00694	1.92084	0.0632609	0.175694
BOLA1	1.88394	2.08368	-0.14538	0.175731
SNX25	1.94363	1.86045	0.0630978	0.175789
SLC22A7	1.98446	2.10323	-0.0838587	0.175917
CMYA5	1.92519	1.97842	-0.0393478	0.176065
LOC100272216	1.92352	2.08179	-0.114076	0.176228
MIR5588	2.28548	2.00302	0.190326	0.176243
PER3	2.00868	1.91853	0.06625	0.176265
MXD1	1.93187	1.99759	-0.0482609	0.176346
ADCY3	1.94026	2.02487	-0.0615761	0.176458
LEMD1-AS1	1.96224	2.08619	-0.0883696	0.176492
CNOT11	1.947	2.00543	-0.042663	0.176498
DCLRE1B	1.89704	1.97425	-0.0575543	0.176902
BCL2L11	1.96905	2.1007	-0.0933696	0.177163
ASB1	1.9302	1.99879	-0.0503804	0.177452
MCM2	1.95545	2.04202	-0.0625	0.177469
PCDHAC1	1.94868	2.00362	-0.0401087	0.177541
MIR6831	1.85318	2.11531	-0.19087	0.177543
CASC6	2.0209	1.92258	0.0719565	0.177548
FMO1	2.08132	2.02853	0.0370652	0.177578
FIG4	2	1.91679	0.0613043	0.177622
MIR5690	1.87742	2.09564	-0.158641	0.177672
IPO11-LRRC70	1.92853	1.98081	-0.038587	0.177694
HOXA10-HOXA9	1.96564	2.13452	-0.118913	0.177817
MIR6833	1.69056	2.57305	-0.605978	0.178149
LOC101927884	1.96054	2.10133	-0.100054	0.1783
TNFAIP8	1.95545	2.00846	-0.038587	0.17832
LONRF2	1.97589	2.03649	-0.043587	0.178602
URGCP-MRPS24	1.94363	2.09943	-0.11125	0.178666
LSAMP	1.96905	2.01999	-0.0368478	0.178808
PTPRC	2.0958	2.02975	0.0461957	0.178924
HIST1H1B	1.96224	2.11531	-0.10837	0.178936
FLJ20021	2.12321	1.89269	0.165815	0.179196
FOXQ1	1.96564	2.18069	-0.149783	0.179232
HOTAIRM1	1.95037	2.13131	-0.127989	0.179396
MIR4435-1HG	1.97076	2.08242	-0.0795109	0.179605
BDH2	2.00868	1.91911	0.0658152	0.179724
C4orf47	1.92186	1.83428	0.0672826	0.179956
GK2	2.08855	1.90585	0.132065	0.180132
LMNB1	1.91521	1.96535	-0.0372826	0.180285
WDFY3	1.95206	1.86832	0.0632609	0.180345
POLH	1.9302	2.00846	-0.057337	0.180737
GRM8	2.06874	2	0.04875	0.180749
SNORD96A	1.84197	2.05004	-0.154402	0.180824
LOC102546299	1.92186	1.97247	-0.0375	0.180847
HERC3	1.96394	1.87565	0.0663587	0.180987
ZMYND12	1.99827	1.93013	0.0500543	0.180995
MAS1L	1.76541	2.32596	-0.397826	0.181038
TGFA	1.96224	2.0969	-0.0957609	0.181124
RGMB	1.94194	1.99819	-0.0411957	0.181164
PCDHB3	1.87579	1.97663	-0.0755435	0.18131
PSMG3-AS1	1.95884	2.1185	-0.113043	0.181337
RNF133	2.10125	1.95825	0.101685	0.181408
CENPA	1.89212	1.99338	-0.0752174	0.181411
EPT1	1.90033	1.9826	-0.0611413	0.18157
NUDT3	1.93522	1.99518	-0.0440217	0.181614
KBTBD12	1.94531	2.00785	-0.0456522	0.1819
FGF12-AS1	2.10672	2.01209	0.0663043	0.181978
BRIX1	1.9302	2.04326	-0.0821196	0.182027
RBP2	2.0958	2.02304	0.0509783	0.182034
LOC100288570	1.94194	2.0843	-0.102065	0.182104
MIRLET7G	2.08674	1.79221	0.219511	0.182196
ZNF735P	1.9302	2.04264	-0.0816848	0.182258
MIR4786	1.95714	2.20049	-0.169076	0.182459
NEU2	1.90363	2.05995	-0.113859	0.182556
SF3B4	1.94363	2.12746	-0.13038	0.182866
LOC101927139	2.03144	1.93245	0.0720652	0.182869
LOC101927406	2.03849	1.9814	0.0409783	0.182944
ATP6V1A	1.94363	1.99879	-0.0403804	0.183079
HTRA2	1.99654	2.182	-0.128152	0.183103
CPED1	2.08132	2.01209	0.0488043	0.183106
MSL2	1.91853	1.96179	-0.0321739	0.183107
PRRC1	1.93858	2.00604	-0.0493478	0.183123
CCNO	1.90528	2.09185	-0.134783	0.183246
ADGB	2.00694	1.91391	0.0684783	0.183394
CCDC158	1.95545	1.87961	0.0570652	0.183461
FKBP9P1	1.96394	2.07178	-0.0771196	0.183496
HOOK1	2.01566	1.93537	0.0586413	0.183582
ATP6V1G3	2.10125	2.0322	0.0482065	0.183629
GBAS	1.92686	2.04018	-0.0824457	0.183661
ESR1	1.99308	1.907	0.0636957	0.183798
CPE	1.96224	1.87791	0.0633696	0.183865
BHMT	1.94531	2	-0.04	0.18388
NDUFA2	1.93187	2.05747	-0.0908696	0.183904
HDAC3	1.94194	2.00906	-0.0490217	0.183957
LTC4S	1.9302	2.16367	-0.164728	0.183965
NAA11	1.96224	1.87057	0.0690217	0.184367
LOC152225	1.9776	2.04079	-0.0453804	0.184441
LINC00271	2.00694	1.92664	0.058913	0.18454
SNORD103A	1.89868	2.15586	-0.183261	0.184763
SNORD103B	1.89868	2.15586	-0.183261	0.184763
MIR2054	2.18102	1.94824	0.162826	0.184816
SNORD11B	2.21338	1.97187	0.166685	0.184839
LOC100507564	2.09217	1.99158	0.071087	0.184883
ACTG1P4	2.16971	1.99819	0.118804	0.184937
BMP3	1.99481	1.90183	0.0688587	0.18497
EFCAB12	1.95545	2.03098	-0.0546739	0.185039
PARM1	1.99135	1.90757	0.0620109	0.185057
CCDC127	1.90693	2.01148	-0.0770109	0.185115
HEXB	1.92186	1.97365	-0.0383696	0.185121
NSUN3	1.95206	2.00483	-0.0384783	0.185135
RPL21P44	2.04734	1.89668	0.110272	0.185301
UTRN	1.98791	1.90298	0.0629891	0.185448
TUBA4A	1.98791	2.12554	-0.0965761	0.185506
CBX3	1.94194	2.10958	-0.119457	0.185532
ALPK1	1.96905	1.8887	0.0601087	0.185543
ODAM	2.00173	1.89554	0.0786413	0.18556
PDLIM4	1.99135	2.13324	-0.0992935	0.185594
SETD7	1.97076	1.88984	0.0604891	0.185624
DTX2P1-UPK3BP1-PMS2P11	2.01391	2.13903	-0.0869565	0.185637
LINC01023	2.13984	1.94766	0.135761	0.185701
TMA16	1.98446	1.89725	0.064837	0.185729
MOXD1	2.0174	1.92838	0.0651087	0.185756
SEC24D	1.96735	1.8887	0.0588587	0.185778
PCDHA11	1.947	2.00181	-0.0400543	0.185793
SLC2A2	2.22684	2.1026	0.0828261	0.186027
PHGDH	2.02265	2.10704	-0.0589674	0.186125
DIAPH1	1.93522	1.98918	-0.0396739	0.186133
FAM198B	1.98963	1.9093	0.0594565	0.18615
ADAD1	1.96224	1.88472	0.0581522	0.186202
FGFR4	1.92686	2.08808	-0.115924	0.186306
LOC100507387	1.86607	1.98918	-0.0921739	0.186543
RFC4	1.97418	2.06804	-0.0670109	0.186605
MIR4636	1.92019	2.20116	-0.197011	0.186901
MLLT4	1.98275	1.90069	0.0609783	0.186902
RARS2	1.97076	1.88245	0.0661413	0.187023
NAA15	1.93187	1.85262	0.0604348	0.187175
LOC285768	1.93522	2.0488	-0.0822826	0.187218
MED23	2.01042	1.91795	0.0679348	0.187441
SRD5A1	1.947	2.03772	-0.0657065	0.187468
TREML4	1.99135	2.07428	-0.0588587	0.187482
PDIA6	1.92019	1.99639	-0.0561413	0.187495
EDNRA	1.95884	1.87848	0.0604348	0.187548
SNRNP27	1.87742	1.95353	-0.057337	0.187556
CD1A	1.98791	2.13131	-0.100489	0.187569
FGF12	2.10125	2.01513	0.0603804	0.187669
LGALS8-AS1	2.01217	2.19123	-0.122989	0.187757
PCDHA12	1.94363	1.9994	-0.0408152	0.187794
MAP7	2.00347	1.92084	0.0607609	0.187824
LNX1-AS1	1.95545	1.86888	0.0653261	0.187826
VSIG8	2.0958	2.24132	-0.0968478	0.188003
DDIT4L	2.0174	1.90241	0.0846739	0.188088
FAM13B	1.91189	1.97068	-0.0436957	0.188091
YTHDC1	1.96735	1.87396	0.070163	0.188098
SPOCK1	1.96735	2.01573	-0.0350543	0.188181
MND1	1.95037	1.87509	0.0567935	0.188187
TXLNB	2.00173	1.9093	0.0682065	0.188236
HIVEP2	2.01391	1.93013	0.0613043	0.188248
AP4B1	1.90363	1.97484	-0.0529891	0.188287
CYP4V2	1.96905	1.87509	0.0705435	0.188294
ZNF733P	1.9302	2.02975	-0.0725543	0.188306
REEP2	1.9302	2.08116	-0.108641	0.188453
FOXK1	1.93355	2.06492	-0.094837	0.188561
LOC101927640	2.00173	1.91564	0.0634239	0.188561
UHRF1BP1	1.9369	1.99579	-0.0432065	0.188624
SOGA3	2.02968	1.9377	0.0669022	0.188934
UCHL5	2.09943	2.02853	0.0495652	0.188994
KIFC1	1.90858	1.99639	-0.0648913	0.189225
FCRL3	2.01566	2.14032	-0.0865761	0.189257
FCHO2	1.92186	1.97068	-0.0361957	0.189312
TMEM154	1.96054	1.88188	0.0590761	0.189313
COL6A6	1.96054	1.99879	-0.0278804	0.189364
ZNF512	1.93187	2.00483	-0.0534783	0.189523
C5orf47	1.91687	2.03098	-0.0834239	0.189593
PCSK1	1.95376	2.01816	-0.0467935	0.189596
TMEM163	1.96735	2.06554	-0.0702717	0.18971
LOC100507388	1.99654	1.90126	0.0705435	0.189744
FAM46A	2.04911	1.9418	0.0776087	0.189852
MIR490	2.05267	2.31407	-0.172935	0.189927
AGPAT9	1.93858	1.86157	0.0584783	0.18993
IFRD1	2.05623	1.99038	0.0469565	0.189958
SEC62	2.21146	2.09375	0.078913	0.189999
ZNF454	1.86284	1.98618	-0.0925	0.190109
PEX3	2.02968	1.94004	0.065163	0.190114
ACAD11	1.95206	1.99218	-0.0293478	0.19013
B4GALT4-AS1	1.96054	2.01027	-0.0361413	0.190165
C6orf7	2.01391	1.92722	0.0634783	0.190232
NPHP3-ACAD11	1.95545	1.99879	-0.0316304	0.190257
IQGAP2	1.9302	1.97961	-0.0364674	0.190276
CDC40	1.98791	1.91103	0.0569022	0.19042
KIAA1244	2.00521	1.91564	0.0659239	0.190428
LOC284950	1.98618	2.05809	-0.0513043	0.190429
UGT2B4	1.96054	1.88245	0.0586413	0.190443
ASB15	2.09217	2.01573	0.0536957	0.19055
RGS2	2.17347	2.06741	0.0721739	0.190669
TRIP13	1.94026	2.0451	-0.0759239	0.190881
SPAM1	2.06694	2	0.0475	0.190912
CTNNA1	1.91521	1.97009	-0.0407609	0.190937
GYPE	1.97931	1.8944	0.0632609	0.191043
MDH2	2.00694	2.13388	-0.0884783	0.191247
CENPK	1.91023	1.97128	-0.0453804	0.191255
C2orf76	1.96054	2.01513	-0.0396196	0.191501
NAALADL2-AS2	2.17347	2.04819	0.0856522	0.191536
GUCA1B	1.947	2.01756	-0.0513587	0.191565
LOC728040	1.9776	1.90012	0.057663	0.191725
TRAPPC12	1.95376	2.00967	-0.0407065	0.191774
RGS21	2.12138	2.04757	0.051087	0.19182
CAD	1.94868	2.01999	-0.0518478	0.191835
PCDHA1	1.94868	2	-0.0375	0.191838
GGNBP1	1.94868	2.08745	-0.0992391	0.191925
LOC148709	1.96394	2.03159	-0.0488587	0.191959
LOC101927190	1.91189	1.99458	-0.061087	0.19199
SULT1B1	1.98963	1.9093	0.0594565	0.192019
TEX261	1.97418	2.11722	-0.100924	0.192118
MIR2682	2.14355	1.96475	0.125652	0.192192
F11R	1.98103	2.13517	-0.108098	0.192299
LOC100506122	2	1.91103	0.0656522	0.192305
RAB1A	1.90693	1.95943	-0.0391848	0.192391
CLIC1	1.88884	2.1007	-0.15337	0.192408
BTN2A2	1.98791	2.06866	-0.0574457	0.192419
PGBD2	2.16407	2.05995	0.0711413	0.192451
LOC100129636	1.93522	2.03037	-0.0692391	0.19248
SNORA63	1.91521	2.16628	-0.177717	0.192797
OGDH	1.94531	2.08808	-0.102174	0.192804
CHCHD5	1.89704	2.06991	-0.125815	0.192919
MIR548AR	2.61398	1.94824	0.424076	0.192933
MET	2.08855	2.01877	0.0490217	0.192982
LOC100506688	1.95206	2.0488	-0.0697826	0.19339
POLE4	1.91521	2.06804	-0.110761	0.193395
ZEB2-AS1	1.76082	1.89497	-0.105924	0.193406
LINC01350	2.1049	2.04757	0.039837	0.193476
WEE2-AS1	2.06874	1.99398	0.0530978	0.193492
LINC01011	1.95376	2.10895	-0.110272	0.193528
PERP	2.01217	1.91506	0.0713587	0.193548
CADM3-AS1	2.05445	2.16171	-0.0734239	0.193836
JMY	1.91355	1.96594	-0.0389674	0.193888
FAM86DP	1.90528	2.01695	-0.0821739	0.194053
MIR577	2.25597	2.00241	0.172011	0.194063
PMS2P4	1.97589	2.09501	-0.0844565	0.194179
FAM162A	1.97247	2.03711	-0.0465217	0.194213
RHBDD2	1.97931	2.08179	-0.0728261	0.194263
LOC101927027	1.96054	2.01634	-0.0404891	0.194553
STAP1	1.97247	1.88813	0.0630435	0.194855
ABI3BP	1.98963	2.04634	-0.0405435	0.195078
METAP1	1.95714	1.87396	0.062663	0.195093
LOC100507477	2.0209	1.92896	0.0671739	0.195116
ZSWIM2	2.02792	1.96653	0.0443478	0.195223
G3BP2	1.97931	1.89326	0.0641304	0.195277
TEDDM1	2.06874	1.94824	0.0865761	0.195279
SPRY1	2.00868	1.87678	0.0979891	0.195404
RAB24	1.95037	2.15196	-0.141902	0.195441
SH3D19	1.94531	1.87057	0.0565217	0.195447
DMP1	1.99135	1.90012	0.067663	0.19545
LOC102060414	1.93187	2.11404	-0.13	0.195498
TJAP1	1.96905	2.0488	-0.0572826	0.19566
TMPRSS11BNL	1.95206	1.87057	0.0615217	0.195769
KLHL32	2.00521	1.92026	0.0624457	0.19593
DGUOK	1.95037	2.0724	-0.0875543	0.195939
LAMTOR3	1.99308	1.9047	0.0654348	0.195981
BNIPL	1.96224	2.11659	-0.109239	0.196203
BRINP3	2.08674	2.02487	0.0434239	0.196224
HSD3B2	1.98963	2.10831	-0.083587	0.19624
FRS3	1.96564	2.05499	-0.0641304	0.196245
SCARNA7	2.40327	2.12746	0.17587	0.196279
MIR6068	2.06874	1.86045	0.153098	0.196309
ZNF318	1.95037	2.02548	-0.0545109	0.196399
PGM3	2	1.92664	0.053913	0.196711
HYMAI	2.06694	1.92548	0.102283	0.196744
DBNL	1.99481	2.14032	-0.101576	0.196799
SAP30L	1.9369	2.01634	-0.0579891	0.196844
AIG1	2.00694	1.92142	0.0628261	0.196971
SLC18B1	1.96735	1.89041	0.0575543	0.197035
PARK2	1.98446	1.89269	0.0683152	0.197038
WASL	2.08132	2.00967	0.0505435	0.197046
RBM34	1.94026	2.05004	-0.0794022	0.197132
C7orf65	1.96905	2.12618	-0.110761	0.197151
LOC100506123	1.92853	1.99879	-0.0516304	0.197319
SDAD1	1.96564	1.88188	0.0628261	0.197418
HCG4	1.84837	2.17478	-0.23462	0.197625
NDUFA4	1.94194	2.15196	-0.148152	0.197662
LOC102467080	1.94531	1.99518	-0.0365217	0.197744
AOX1	1.96905	2.01999	-0.0368478	0.197782
CLCN1	2.05089	1.98738	0.0453804	0.197937
TRIM60	1.947	1.8476	0.0755978	0.198035
SERAC1	1.98103	1.89668	0.0627717	0.198083
SCARNA6	1.84197	2.03037	-0.140489	0.198142
SUN1	1.94026	2.0887	-0.106359	0.198155
ABCG8	1.97247	2.10767	-0.0956522	0.198294
OR5H6	1.94194	2.06554	-0.0890217	0.198322
LOC643623	2.00521	1.92664	0.057663	0.198523
SLC35A1	1.99827	1.90642	0.0678804	0.198533
USP49	1.9302	1.99158	-0.045163	0.1986
IMPG2	1.98103	2.03711	-0.0402717	0.198641
RANBP17	1.92352	2.03159	-0.0788587	0.198678
SNORD11	2.06694	1.88075	0.136196	0.198719
TREML1	2.02792	2.14355	-0.08	0.198861
RASL11B	1.96564	1.83484	0.0993478	0.198879
PSMC2	1.96224	2.05004	-0.0631522	0.198883
DCUN1D4	1.96905	1.88301	0.0644565	0.199067
MTA3	1.92186	1.97484	-0.0392391	0.199121
C5orf64	1.947	1.99458	-0.034837	0.199231
OR2V1	1.9302	2.13452	-0.145163	0.199404
TRIML1	1.8954	1.80304	0.0720652	0.199442
[truncated: 7,989 more rows]

## Sheet: Supplementary Table 4
Supplementary Table 4. RNA expression between CLDN18-ARHGAP (+) and CLDN18-ARHGAP26/6 (-) group in the cohort of TCGA (N=284).
Gene	CLDN18-AHRGAP26/6 (+) group (N=13)	CLDN18-AHRGAP26/6 (-) group (N=271)	Log2FoldChange (Fusion/Non-fusion)	P value	FDR
HDC	12.074	0.527807	4.51574	1.20851e-05	0.165447
LILRA1	31.0231	0.44566	6.12126	2.09958e-05	0.165447
CPA3	218.957	11.5038	4.25047	4.15423e-05	0.198071
RASGRP4	38.1394	0.915794	5.38011	5.02717e-05	0.198071
SIGLEC6	11.8284	0.678707	4.12332	0.000121242	0.28314
EMR3	19.9464	0.390986	5.67287	0.000142995	0.28314
C10orf128	11.4705	0.738705	3.95679	0.000178632	0.28314
MIR4767	6.50646	2.24979	1.53208	0.000260888	0.28314
MS4A7	207.007	6.94728	4.89709	0.000260888	0.28314
MIR223	11.5616	0.646239	4.16113	0.0003011	0.28314
IL1RL1	13.5942	0.667998	4.347	0.000323314	0.28314
LILRA5	35.5841	1.22318	4.86253	0.000323316	0.28314
CD177	94.0346	9.25545	3.34482	0.000327937	0.28314
XIST	668.629	4.95078	7.0774	0.00034089	0.28314
PIK3R5	84.8533	2.40306	5.14203	0.00036722	0.28314
AK056897	320.053	1.80337	7.47147	0.000393957	0.28314
MS4A2	18.712	0.860722	4.44227	0.000405154	0.28314
CASS4	44.7202	0.577059	6.27607	0.000456131	0.28314
MEFV	36.6862	0.429979	6.41483	0.000459313	0.28314
TPSAB1	411.593	27.2164	3.91867	0.000472235	0.28314
TAGAP	141.07	3.66144	5.26786	0.000472236	0.28314
STS	864.944	5.84935	7.20819	0.000534681	0.28314
STARD8	89.3208	1.83036	5.60879	0.000542073	0.28314
SEMA3G	100.8	2.64098	5.25428	0.000549565	0.28314
DENND3	206.668	2.19958	6.55395	0.000549565	0.28314
CCR4	18.9693	1.75916	3.43071	0.00056483	0.28314
SRGN	2047.93	56.4473	5.18112	0.000580497	0.28314
RGS18	23.2002	1.10277	4.39493	0.000638558	0.28314
GDF6	21.2417	0.25705	6.36871	0.000646476	0.28314
TSPAN6	137.828	17.3286	2.99164	0.000683294	0.28314
KLHL6	70.664	1.82652	5.27381	0.000701989	0.28314
EFNA2	199.523	7.26093	4.78025	0.000711514	0.28314
LOC389332	15.9666	2.7314	2.54734	0.000720583	0.28314
SLCO2A1	252.675	12.68	4.31666	0.000740814	0.28314
BTK	41.5815	2.16859	4.26111	0.000781624	0.28314
TSIX	229.587	1.44139	7.31543	0.000789958	0.28314
GCG	24.1296	5.91985	2.02717	0.000799748	0.28314
CSF2RB	353.818	6.99917	5.65968	0.000802806	0.28314
ANXA10	1003.4	51.2856	4.2902	0.00082451	0.28314
CLEC10A	18.6681	2.51779	2.89035	0.00083557	0.28314
GPR77	13.235	0.520655	4.66789	0.00083557	0.28314
ALPL	423.575	4.09153	6.69383	0.00084677	0.28314
S1PR1	186.231	11.7248	3.98946	0.00084677	0.28314
TESPA1	15.6508	1.1329	3.78815	0.00084677	0.28314
IL7R	170.301	6.22157	4.77466	0.000846771	0.28314
ADCYAP1	33.2405	0.519822	5.99878	0.000857943	0.28314
NHSL2	38.83	1.08663	5.15923	0.000881194	0.28314
TPK1	240.857	2.57817	6.54568	0.000929121	0.28314
SLC25A20	140.899	9.69541	3.86122	0.000953981	0.28314
TEK	65.2366	2.62346	4.63614	0.000953981	0.28314
PPARGC1B	124.431	2.01132	5.95106	0.000966641	0.28314
ZEB2	426.929	3.28104	7.0237	0.000979453	0.28314
CR1	70.2945	0.566843	6.95432	0.00100555	0.28314
RAB27B	1222	8.73639	7.128	0.00100556	0.28314
MCTP1	48.647	1.87516	4.69726	0.0010323	0.28314
FLI1	112.066	4.02665	4.79863	0.0010597	0.28314
RNF152	41.3465	1.8625	4.47245	0.00110207	0.28314
CLEC17A	2.10529	1.00441	1.06767	0.00111651	0.28314
TLL1	17.5355	0.280907	5.96404	0.00117616	0.28314
PIK3R3	257.508	5.06492	5.66793	0.00117617	0.28314
CCL22	221.466	2.89125	6.25925	0.00122282	0.28314
FCER1A	6.19212	1.89578	1.70764	0.0012548	0.28314
CNTN4	59.6359	1.02564	5.86158	0.00127938	0.28314
ADH1C	422.75	63.6203	2.73225	0.00128767	0.28314
PIK3CG	54.1015	2.08077	4.70048	0.00128767	0.28314
MYBPC2	133.317	0.401384	8.37566	0.00132953	0.28314
KIAA0141	390.596	9.0663	5.42902	0.00135568	0.28314
TPSB2	222.188	11.9939	4.21141	0.00139092	0.28314
HPGDS	13.4711	1.36805	3.29967	0.00139092	0.28314
CMBL	578.994	15.8654	5.1896	0.00140885	0.28314
FAM49A	88.8067	2.63863	5.07281	0.0014179	0.28314
SLC25A46	319.888	11.793	4.76156	0.00146394	0.28314
RCSD1	88.0613	5.97445	3.88163	0.00148274	0.28314
PIWIL2	30.2714	0.512346	5.88469	0.00150176	0.28314
TNFSF8	27.3413	0.964135	4.82571	0.001521	0.28314
SHE	37.5537	1.50145	4.64452	0.00154047	0.28314
IL17REL	6.67742	0.944453	2.82174	0.00159016	0.28314
DOC2B	729.533	5.66838	7.00789	0.00164133	0.28314
P2RY14	27.043	2.66079	3.34533	0.00166221	0.28314
MS4A14	23.0003	0.743752	4.95069	0.00168333	0.28314
SELP	44.0857	3.56799	3.62713	0.00168334	0.28314
COL14A1	1049.39	14.9034	6.13777	0.00174822	0.28314
KCNN3	49.0909	1.3389	5.19634	0.00179274	0.28314
TSC22D3	610.865	34.5025	4.14608	0.00179275	0.28314
HEG1	1363.94	10.8718	6.97105	0.0018154	0.28314
SAMSN1	132.877	5.52793	4.5872	0.00190865	0.28314
ADH1B	201.044	8.8429	4.50685	0.00190865	0.28314
DPT	296.267	12.0564	4.61903	0.00193264	0.28314
OLFM1	445.813	2.13086	7.70886	0.00193264	0.28314
FCAR	28.5631	0.262955	6.76319	0.00195676	0.28314
RGS2	473.348	39.5897	3.5797	0.00195691	0.28314
FGF10	6.75504	1.50173	2.16934	0.00200616	0.28314
HSD17B4	1061.27	26.0635	5.34761	0.00200629	0.28314
FPR1	324.09	5.8613	5.78903	0.0020314	0.28314
SAR1B	805.214	10.0017	6.33105	0.00205681	0.28314
FOLR2	132.195	10.6708	3.63093	0.0020825	0.28314
MFAP5	611.274	9.18363	6.05661	0.00213477	0.28314
SLA	198.576	4.24607	5.54742	0.00213477	0.28314
GABRP	120.6	33.8606	1.83255	0.00218824	0.28314
JAM2	46.7687	6.68791	2.80592	0.00218825	0.28314
CYP2C19	408.844	8.38214	5.60809	0.00221544	0.28314
ANPEP	812.652	195.085	2.05853	0.00221544	0.28314
SIGLEC5	52.2255	0.603029	6.43638	0.00225681	0.28314
ADRB2	18.77	1.41517	3.72938	0.00227076	0.28314
PDE4B	309.124	4.09603	6.23781	0.00229889	0.28314
GSR	1394.9	30.4692	5.51666	0.0022989	0.28314
MIR3685	0.633464	1.6514	-1.38236	0.00231027	0.28314
LIX1L	102.856	11.3866	3.17522	0.00232735	0.28314
ADH4	33.5855	3.62591	3.21142	0.00235325	0.28314
GPR183	135.919	9.34978	3.86167	0.00235612	0.28314
YTHDC2	336.757	4.78249	6.13781	0.00235612	0.28314
LOC100132891	96.8954	1.39603	6.11703	0.00235612	0.28314
TM6SF2	24.2994	7.4867	1.69852	0.00238522	0.28314
CPNE1	597.863	48.7258	3.61706	0.00238522	0.28314
TADA2B	267.485	6.30961	5.40576	0.00241464	0.28314
FCER2	8.76252	1.26423	2.79309	0.00247432	0.28314
STOM	1645.06	56.3112	4.86858	0.00247451	0.28314
TDRD6	23.004	0.279949	6.36058	0.00250492	0.28314
LHFPL2	482.967	9.12635	5.72574	0.00250494	0.28314
ADD2	23.4287	0.300379	6.28535	0.00253568	0.28314
CFH	602.595	11.8072	5.67345	0.00253572	0.28314
FAM107A	24.3686	2.37464	3.35924	0.00256683	0.28314
P2RY10	20.6829	2.60369	2.98981	0.00256684	0.28314
IGF1	573.829	7.3169	6.29324	0.0025983	0.28314
P2RY8	39.1489	3.7039	3.40185	0.0025983	0.28314
PLCL2	55.2221	2.7789	4.31266	0.00259831	0.28314
ETFDH	153.054	6.98848	4.45292	0.00259831	0.28314
IKZF1	147.743	3.60237	5.358	0.00259831	0.28314
FAM124B	9.5112	0.812709	3.54882	0.00263012	0.28314
PLIN4	218.744	7.29392	4.90641	0.00263013	0.28314
DCLK1	26.7736	0.927297	4.85164	0.00266229	0.28314
MPEG1	448.952	12.8529	5.12639	0.00266231	0.28314
TMCO7	126.991	2.35702	5.75162	0.00266231	0.28314
PRAM1	23.1478	1.20176	4.26766	0.00266231	0.28314
RGS13	2.8047	2.61319	0.102034	0.00269482	0.28314
MYO1F	277.009	5.75733	5.58839	0.00269485	0.28314
ADAMTSL1	69.3372	0.847131	6.3549	0.00272774	0.28314
FAM43B	20.8684	0.282262	6.20814	0.00274427	0.28314
CD1D	11.9817	0.634169	4.23982	0.00282865	0.28314
ZNF385D	6.49897	0.81907	2.98815	0.00282865	0.28314
GVINP1	27.6321	1.16087	4.57307	0.00282866	0.28314
IL16	96.6197	2.43052	5.31298	0.00282867	0.28314
ALDH2	3071.63	120.013	4.67774	0.00286306	0.28314
ARHGEF15	73.9362	2.48805	4.89319	0.00289782	0.28314
CSF3R	417.909	4.47002	6.54677	0.00293297	0.28314
ATP8B4	25.144	0.400985	5.97052	0.00293297	0.28314
C16orf54	23.0455	2.30078	3.32429	0.00293298	0.28314
FCRLA	15.7866	3.07087	2.36198	0.00296852	0.28314
CXorf61	0.37665	6.45076	-4.09817	0.00298126	0.28314
ZBTB16	16.722	1.4439	3.53371	0.00300444	0.28314
BC061919	7.0437	0.798537	3.1409	0.00300445	0.28314
PRKCB	83.0986	3.93029	4.40212	0.00300446	0.28314
IQGAP2	1199.54	17.0875	6.13339	0.0030408	0.28314
KIT	80.2509	3.40385	4.55928	0.00311466	0.28314
FLRT2	112.156	2.67732	5.38857	0.00315222	0.28314
TLR4	173.559	3.22114	5.75171	0.00315222	0.28314
PRICKLE1	126.711	1.61236	6.29623	0.00319016	0.28314
IL10RA	254.712	6.36314	5.32298	0.00319017	0.28314
EFEMP1	1431.12	29.4527	5.6026	0.00319017	0.28314
PREX2	16.8428	0.554273	4.92539	0.00322854	0.28314
WDFY4	89.1008	1.80837	5.62267	0.00322855	0.28314
CD1C	4.51329	1.1059	2.02896	0.00326734	0.28314
SCIMP	31.1389	1.72605	4.17317	0.00326734	0.28314
TLR6	19.7327	0.796778	4.63026	0.00326734	0.28314
COL15A1	3321.65	36.2946	6.516	0.00326734	0.28314
WIPI2	349.393	10.8925	5.00344	0.00330656	0.28314
HV303147	6.42487	3.82533	0.748083	0.0033462	0.28314
DMXL1	388.214	3.08707	6.97447	0.0033462	0.28314
TMEM119	472.168	12.7174	5.21443	0.00334621	0.28314
EVI2B	231.205	20.9462	3.46441	0.00334621	0.28314
PER1	888.561	12.1892	6.18779	0.00334621	0.28314
C20orf160	21.4855	1.69224	3.66635	0.00338628	0.28314
DOCK10	104.384	1.8841	5.79189	0.0034268	0.28314
CD69	60.1138	3.02542	4.31249	0.00342681	0.28314
SEMA6B	358.141	5.68363	5.97757	0.00342681	0.28314
CXorf36	108.066	2.57762	5.38972	0.00342681	0.28314
GREM2	15.4566	3.0474	2.34257	0.00346776	0.28314
SNRK	336.941	8.29141	5.34473	0.00346776	0.28314
PDGFRA	1022.86	8.30771	6.94394	0.00346776	0.28314
RAB30	34.96	2.64045	3.72685	0.00350917	0.28314
MARCH9	95.5974	6.24699	3.93574	0.00350917	0.28314
DPY30	158.286	38.3826	2.044	0.00350917	0.28314
BST1	60.1851	4.11645	3.86994	0.00350917	0.28314
SCN4B	18.017	1.05222	4.09785	0.00355101	0.28314
FGR	132.156	3.17573	5.37901	0.00355101	0.28314
GPR65	36.5998	1.15655	4.98394	0.00355101	0.28314
CYYR1	62.2982	4.84717	3.68398	0.00355101	0.28314
IKZF3	43.5541	4.6434	3.22956	0.00355102	0.28314
SVEP1	222.261	2.01734	6.78365	0.00355102	0.28314
C14orf49	18.5431	1.08167	4.09955	0.00359331	0.28314
C1orf38	267.116	9.30587	4.84318	0.00359332	0.28314
WNT2B	7.80336	2.45186	1.67022	0.00359332	0.28314
CFD	313.252	45.1858	2.79338	0.00359332	0.28314
DOCK8	239.507	3.3413	6.16352	0.00361464	0.28314
CACNA2D1	43.8425	2.2487	4.28517	0.00363608	0.28314
MS4A6A	288.963	13.0391	4.46997	0.00367931	0.28314
HIC1	325.012	7.45024	5.44706	0.00367931	0.28314
C5AR1	564.598	10.3323	5.77199	0.00367931	0.28314
Em:AC008101.5	79.352	11.4175	2.79702	0.00367931	0.28314
SFMBT2	69.1227	1.22788	5.81492	0.00376716	0.28314
TMEM150B	42.6632	5.62372	2.9234	0.00376717	0.28314
DTWD2	161.318	2.69827	5.90173	0.00376717	0.28314
FGD2	66.8426	1.78113	5.2299	0.00376717	0.28314
KCNA3	21.7613	1.49142	3.86701	0.0037894	0.28314
SLC46A3	291.386	2.9098	6.64587	0.0038118	0.28314
PTGDS	352.719	29.0079	3.604	0.00381181	0.28314
MUC17	110.977	25.4269	2.12583	0.0038568	0.28314
LOC100505549	96.1074	3.94104	4.608	0.00385692	0.28314
RNF14	311.204	7.23356	5.42701	0.00385693	0.28314
HAPLN4	12.2871	1.74265	2.81779	0.00390251	0.28314
FCGBP	4862.88	20.765	7.87151	0.00390252	0.28314
RAB27A	331.162	12.7249	4.70181	0.00390253	0.28314
TP53INP1	99.8033	6.08835	4.03496	0.00390253	0.28314
PDE4C	35.1799	1.08651	5.01698	0.0039486	0.28314
SULT1B1	36.9076	6.99051	2.40045	0.00394862	0.28314
KBTBD11	108.151	3.64472	4.8911	0.00394862	0.28314
RHOH	106.916	4.16206	4.68304	0.0039952	0.28314
PTPRC	421.099	10.9786	5.2614	0.00399521	0.28314
CXCL12	974.812	10.8622	6.48774	0.00399521	0.28314
ADCY7	348.527	5.92846	5.87747	0.00399521	0.28314
FUT10	126.065	2.21509	5.83065	0.00399521	0.28314
ADH1A	9.57298	0.723857	3.72519	0.00404118	0.28314
GMDS	541.018	70.4606	2.94079	0.00404229	0.28314
PLN	167.862	23.6084	2.8299	0.00404229	0.28314
EGR3	360.804	3.54105	6.6709	0.00404229	0.28314
TLR1	64.781	2.57337	4.65384	0.00418659	0.287093
ARHGEF6	126.332	3.98163	4.98772	0.00418659	0.287093
CFP	28.6995	0.71662	5.32367	0.00423566	0.287093
HBEGF	783.436	11.7991	6.05307	0.00423572	0.287093
SLIT3	674.378	7.214	6.54661	0.00423572	0.287093
CYP7B1	48.4602	1.59997	4.92068	0.00423572	0.287093
NLRP3	49.774	0.715517	6.12026	0.00428534	0.287093
ACOX3	151.085	6.63734	4.50861	0.00428536	0.287093
REEP5	1388.17	35.3878	5.29378	0.00428536	0.287093
CLIC2	44.2524	4.37698	3.33775	0.00433553	0.287093
KCNE3	755.355	33.7797	4.48293	0.00433554	0.287093
ZNF575	152.966	5.7094	4.74373	0.00433554	0.287093
SLC37A1	1837.65	22.2534	6.3677	0.00433554	0.287093
ARHGAP31	410.33	4.67211	6.45657	0.00438625	0.287606
ZNF366	11.7122	0.947708	3.62743	0.00438625	0.287606
ACO2	1585.77	70.8112	4.48506	0.00443749	0.287606
LTK	71.7911	1.86744	5.26468	0.00448926	0.287606
C19orf35	13.172	0.516716	4.67196	0.00448927	0.287606
CCNI2	155.131	3.93642	5.30046	0.00448927	0.287606
COTL1	4099.96	128.341	4.99756	0.00448928	0.287606
EVI2A	79.2625	3.6613	4.43621	0.00448928	0.287606
ABCA8	29.662	1.96426	3.91656	0.00454161	0.289637
DOCK2	191.664	3.58414	5.74081	0.00459449	0.289637
MMRN2	197.4	8.45848	4.54458	0.0045945	0.289637
AOC3	579.248	23.0581	4.65083	0.0045945	0.289637
FCRL3	12.5396	0.76453	4.03577	0.00464791	0.290553
JAKMIP2	14.0697	0.665464	4.40208	0.00464792	0.290553
LRRC31	31.7086	2.5992	3.60873	0.00470169	0.290553
TMEM71	21.7088	1.12014	4.27653	0.00475651	0.290553
ARHGAP15	34.6121	3.63825	3.24996	0.00475652	0.290553
CYTIP	120.432	7.14749	4.07464	0.00475652	0.290553
CLEC3B	43.6479	17.519	1.31699	0.00475652	0.290553
ITK	40.0012	1.95731	4.3531	0.00475652	0.290553
BICC1	154.889	3.25659	5.57173	0.00481167	0.291661
GIMAP6	142.137	5.83759	4.60576	0.00481167	0.291661
NKX6-3	35.2548	2.52915	3.8011	0.00487031	0.294084
LDB2	73.2143	4.05985	4.17263	0.0049237	0.29475
FCN1	85.1233	2.86098	4.89497	0.0049237	0.29475
LOC100506990	37.1261	0.94344	5.29836	0.00495205	0.29475
CD93	785.18	13.87	5.82298	0.00498059	0.29475
NFKBIL1	72.0145	9.44903	2.93005	0.00498059	0.29475
APC	380.773	3.67113	6.69656	0.00509614	0.29475
CCZ1B	18.6412	2.84203	2.7135	0.00509616	0.29475
FEM1C	432.414	7.25275	5.89774	0.00512542	0.29475
TRGV3	7.50509	0.711785	3.39836	0.00515477	0.29475
TAF13	105.293	15.8273	2.73393	0.00515486	0.29475
CRISPLD2	2119.15	16.6495	6.99186	0.00515486	0.29475
ADAMTS1	610.477	15.0108	5.34586	0.00515486	0.29475
MIR3661	168.928	57.2665	1.56065	0.00515486	0.29475
CFTR	238.432	8.12918	4.87432	0.00521413	0.29475
X06774	8.46276	0.714216	3.5667	0.00521413	0.29475
RASSF2	130.362	6.45661	4.3356	0.00521416	0.29475
NCKAP1L	229.892	7.07658	5.02176	0.00521416	0.29475
LOC728558	26.0954	0.492855	5.72649	0.00527407	0.29475
TSHZ3	183.85	3.50153	5.7144	0.00527408	0.29475
EXT1	1077.92	24.9208	5.43476	0.00527408	0.29475
CYSLTR1	12.6066	1.93153	2.70636	0.00527408	0.29475
PVRL3	384.066	6.19672	5.95371	0.00533461	0.29708
SNX20	32.0538	1.1623	4.78545	0.00539577	0.298449
METTL24	14.3088	1.94871	2.87631	0.00545758	0.298449
DDR2	322.512	8.03369	5.32715	0.00545759	0.298449
BC078172	2960.98	257.755	3.522	0.00545759	0.298449
SPON1	1483.97	22.4989	6.04346	0.00545759	0.298449
SPNS2	813.325	20.8179	5.28794	0.00552003	0.298449
CD28	19.663	1.05358	4.22212	0.00552003	0.298449
BC070061	28.8046	0.43902	6.03587	0.00553272	0.298449
FAM151B	13.8193	0.459057	4.91187	0.00555144	0.298449
LY86	49.692	7.41757	2.744	0.0055831	0.298449
PTGER2	46.9796	6.2294	2.91487	0.00558311	0.298449
LPPR4	74.31	1.25715	5.88533	0.00564683	0.298449
PHKB	333.398	11.3153	4.8809	0.00564684	0.298449
AX747619	54.3354	3.03388	4.16266	0.00571123	0.298449
PRODH2	43.488	0.121475	8.48381	0.00577568	0.298449
AADAC	23.4223	8.01963	1.54628	0.00577597	0.298449
RECK	111.583	2.06093	5.75867	0.00577627	0.298449
SDCBP	1582.19	53.6398	4.88247	0.00577628	0.298449
ABCA6	25.3224	0.829519	4.932	0.00584196	0.298449
CNRIP1	75.567	1.82224	5.37397	0.00584196	0.298449
PAFAH2	276.357	9.36928	4.88245	0.00584198	0.298449
DUSP8	342.135	7.5731	5.49754	0.00584199	0.298449
CMKLR1	161.858	2.94486	5.78039	0.00584199	0.298449
A4GNT	24.2957	3.74451	2.69785	0.00589059	0.298449
CTSG	30.9522	2.29334	3.75452	0.00590583	0.298449
FAT4	317.659	1.54777	7.68115	0.00590836	0.298449
PARP15	5.23493	1.09381	2.25881	0.00590837	0.298449
SLC4A4	679.092	5.41764	6.9698	0.00590838	0.298449
KLF9	483.836	15.0509	5.0066	0.00590838	0.298449
HAS1	239.788	0.783072	8.2584	0.00597533	0.298962
PIK3R6	17.7336	0.803673	4.46373	0.00597542	0.298962
SNX2	605.77	22.9149	4.72441	0.00597545	0.298962
ADAMTSL3	20.1091	1.17573	4.09622	0.00604318	0.300444
MOB3B	352.9	6.69608	5.7198	0.0060432	0.300444
NOS2	685.439	7.431	6.52733	0.00611165	0.301942
IL33	80.3939	10.5887	2.92456	0.00611165	0.301942
USHBP1	10.1187	0.536899	4.23623	0.0062156	0.302659
KCNK10	39.6669	0.425384	6.54303	0.00625061	0.302659
CYTH4	167.503	2.90411	5.84995	0.00625063	0.302659
GAPT	13.858	1.75303	2.98279	0.00632116	0.302659
SLC16A2	113.868	6.10547	4.22112	0.00632118	0.302659
FAM118B	166.917	9.32119	4.16248	0.00632119	0.302659
DCN	6484.65	187.933	5.10874	0.00632119	0.302659
PTGER1	11.1422	2.41554	2.20561	0.00632119	0.302659
SELL	245.529	8.01877	4.93637	0.00639246	0.302659
SH2B3	573.541	11.1243	5.68811	0.00639246	0.302659
CCR2	18.1847	0.922497	4.30104	0.00646442	0.302659
PGRMC1	714.951	68.0581	3.39301	0.00646445	0.302659
KIAA1644	27.0515	1.90123	3.8307	0.00650071	0.302659
NCF1B	21.5114	1.28258	4.06798	0.00653714	0.302659
ERG	82.2027	1.89532	5.43867	0.00653716	0.302659
PKNOX2	19.1419	0.747156	4.67918	0.00653717	0.302659
SPTSSB	585.635	6.44288	6.50615	0.00653717	0.302659
ARHGAP9	82.6974	3.66593	4.49559	0.00653717	0.302659
CTNNA1	6076.86	93.211	6.02668	0.00653717	0.302659
CLMP	200.641	6.68531	4.90747	0.00661063	0.302659
ITM2A	447.126	13.6753	5.03104	0.00661063	0.302659
GHR	38.5641	1.07515	5.16465	0.00668481	0.302659
HSPA12B	72.3985	3.00366	4.59117	0.00668482	0.302659
SH2D3C	110.724	4.43065	4.64331	0.00668482	0.302659
SLAMF6	44.3607	2.32435	4.25438	0.00675976	0.302659
PPAPDC3	33.277	1.30119	4.67662	0.00675976	0.302659
MCC	102.277	1.90565	5.74606	0.00675977	0.302659
THBD	383.294	11.7238	5.03094	0.00675978	0.302659
C7orf58	72.0757	6.56571	3.45649	0.00679752	0.302659
C16orf89	18.1694	4.8951	1.8921	0.00683547	0.302659
SLC39A14	6537.62	47.8684	7.09355	0.00683548	0.302659
CR2	28.8127	6.37098	2.17712	0.00691176	0.302659
BLK	5.90527	1.22551	2.26862	0.00691189	0.302659
CD36	163.711	3.82217	5.42061	0.00691193	0.302659
GAB3	21.4038	1.12341	4.25191	0.00691193	0.302659
GHRLOS	3.20059	1.2653	1.33886	0.00695042	0.302659
F2RL3	55.8033	4.71986	3.56353	0.00698916	0.302659
AFF3	6.53081	0.792421	3.04292	0.00698916	0.302659
GGT5	763.829	19.1757	5.3159	0.00698916	0.302659
FAM65B	34.0334	1.48115	4.52216	0.00698916	0.302659
MLYCD	100.052	5.70926	4.1313	0.00698917	0.302659
SPSB3	130.621	13.3006	3.29582	0.00698917	0.302659
COLEC12	96.5427	4.39216	4.45816	0.00698917	0.302659
DPEP2	10.7247	1.0747	3.31893	0.00706714	0.302659
COL23A1	8.55076	0.703927	3.60255	0.00706715	0.302659
MIR4632	6.16434	2.75574	1.16151	0.00706716	0.302659
ADHFE1	1.67412	0.945807	0.823787	0.00706716	0.302659
DARC	65.0276	11.7328	2.47051	0.00706717	0.302659
STARD4	80.4799	2.96312	4.76344	0.00706717	0.302659
SLC2A9	38.6716	1.0387	5.21842	0.0072656	0.305929
PDE7B	26.0138	1.26801	4.35864	0.00730586	0.305929
MAN2A1	660.422	9.16726	6.17076	0.00730589	0.305929
RCAN2	58.9606	9.4347	2.6437	0.00730589	0.305929
MECOM	1195.8	14.2897	6.38686	0.00738706	0.305929
IL6ST	1276.31	20.2869	5.97529	0.00738706	0.305929
FHL1	235.771	50.4928	2.22324	0.00738706	0.305929
NMUR2	420.328	2.04704	7.68183	0.00739724	0.305929
MNDA	130.858	6.44409	4.34389	0.00746903	0.305929
APOLD1	226.161	7.44759	4.92443	0.00746903	0.305929
CBFA2T3	18.6998	1.93694	3.27117	0.00746903	0.305929
PDE1A	32.7085	2.02028	4.01704	0.00746903	0.305929
PIGR	14868.5	390.039	5.2525	0.00755182	0.305929
CCL11	125.488	17.9579	2.80485	0.00755182	0.305929
MLK7-AS1	107.186	5.38958	4.3138	0.00755182	0.305929
DUSP27	13.728	2.18089	2.65414	0.00758677	0.305929
GPR157	63.9205	2.06326	4.95328	0.0076354	0.305929
LOC100506585	21.5037	0.548562	5.29279	0.00771983	0.305929
GHRL	6.25752	5.94007	0.075111	0.00771984	0.305929
CILP	482.362	5.25565	6.5201	0.00771986	0.305929
ECM2	157.459	2.6941	5.86903	0.00771986	0.305929
SLCO2B1	830.376	18.189	5.51263	0.00771987	0.305929
CYSTM1	7429.57	228.193	5.02495	0.00771987	0.305929
SERPINB6	1281.63	20.5138	5.96524	0.00771987	0.305929
FAM200A	7.93109	2.52088	1.65359	0.00776239	0.305929
CADPS	5.82924	1.04633	2.47797	0.0078051	0.305929
TRANK1	389.293	4.28736	6.50462	0.00780514	0.305929
ABCA1	535.639	4.69097	6.83523	0.00780514	0.305929
GRASP	61.8308	4.85004	3.67226	0.00780515	0.305929
RNASE6	134.469	15.6648	3.10167	0.00780515	0.305929
C1orf186	8.33427	0.947751	3.13648	0.00789126	0.305929
MS4A4A	139.236	7.02985	4.30789	0.00789126	0.305929
HGF	11.7237	0.797332	3.87811	0.00789127	0.305929
SLC25A37	608.806	5.9677	6.67266	0.00789127	0.305929
PAX5	20.5397	1.48723	3.78771	0.0079345	0.305929
LINGO3	4.0685	0.941307	2.11176	0.00797818	0.305929
KCND3	155.298	2.74945	5.81975	0.00797823	0.305929
BNC2	132.074	1.23095	6.74543	0.00797823	0.305929
CLEC14A	99.764	9.83559	3.34244	0.00797824	0.305929
C18orf1	119.902	2.82745	5.40621	0.00797824	0.305929
MRAP2	124.607	2.51946	5.62813	0.00797824	0.305929
ELMO1	125.433	4.06153	4.94875	0.00797824	0.305929
AKNA	556.303	7.01907	6.30845	0.00797824	0.305929
FCRL1	1.54126	0.884676	0.800893	0.00801876	0.306119
ZNF844	37.6854	2.42781	3.95628	0.00802203	0.306119
CPS1	69.3522	24.3337	1.51099	0.00806605	0.306316
TRERF1	167.641	3.18099	5.71975	0.00806605	0.306316
TLR7	30.9144	1.16728	4.72706	0.00815473	0.307462
TRAF3IP3	35.1262	2.569	3.77327	0.00815474	0.307462
ST8SIA4	96.2004	1.93336	5.63686	0.00815475	0.307462
LYPD6B	584.376	7.11474	6.35994	0.00824431	0.307892
PCYT1A	304.638	16.1792	4.23488	0.00824432	0.307892
CCDC69	149.357	19.247	2.95607	0.00824432	0.307892
SIL1	812.764	20.3282	5.32128	0.00824432	0.307892
ADAMTS15	76.5926	1.44966	5.72342	0.00833475	0.308617
ITGA9	77.8131	4.85848	4.00144	0.00833475	0.308617
DGCR11	21.4841	0.893217	4.58811	0.00842605	0.308617
MORN2	40.0683	11.5852	1.79018	0.00842608	0.308617
SIRPB2	43.1583	0.762865	5.82207	0.00842608	0.308617
CD180	40.2821	3.33476	3.59448	0.00842609	0.308617
FP15737	91.6696	5.38043	4.09065	0.00842609	0.308617
LOC100131825	15.9302	1.0675	3.89945	0.00851817	0.308617
PEAR1	55.5244	2.24749	4.62674	0.0085183	0.308617
CELF2	154.795	4.29603	5.17121	0.00851831	0.308617
S1PR4	26.9643	2.98702	3.17427	0.00851831	0.308617
ADH6	254.702	3.91863	6.02232	0.00851831	0.308617
HDHD1	155.398	8.62708	4.17095	0.00851831	0.308617
ZNF699	18.6744	1.09747	4.0888	0.00856475	0.309588
NADK	562.902	16.8151	5.06506	0.00861143	0.309588
FAM25A	1.30754	9.67857	-2.88794	0.00868457	0.309588
LRRC3	51.33	2.92392	4.13383	0.00870544	0.309588
DTX1	40.5651	3.50226	3.53388	0.00870547	0.309588
SRPX	102.668	7.93033	3.69446	0.00870547	0.309588
LAIR2	11.549	0.8412	3.77917	0.00879972	0.309588
NCF1C	15.6672	1.25039	3.6473	0.00880037	0.309588
JAK2	487.133	7.75189	5.97362	0.00880041	0.309588
AHCYL2	1558.61	15.6976	6.63357	0.00880042	0.309588
CD40LG	19.0123	1.18774	4.00064	0.00880042	0.309588
THSD7A	30.2835	0.590316	5.6809	0.00889624	0.309588
AX747178	7.42061	1.07302	2.78986	0.00889628	0.309588
CD53	513.043	29.2202	4.13404	0.00889629	0.309588
CD22	16.7169	4.06221	2.04097	0.00889629	0.309588
ENPP2	232.462	10.307	4.4953	0.00889629	0.309588
LPAR1	150.525	4.42194	5.08919	0.00889629	0.309588
TRBV30	2.99294	0.956742	1.64536	0.00898627	0.309588
NANOS3	23.1361	1.69857	3.76776	0.00899306	0.309588
AX747191	4.45954	1.01332	2.13781	0.00899309	0.309588
ENTPD1	502.836	5.58211	6.49313	0.0089931	0.309588
LIMA1	1917.89	38.4941	5.63874	0.0089931	0.309588
MMRN1	6.64465	2.10649	1.65735	0.00909082	0.309588
VSTM4	149.16	2.31774	6.008	0.00909083	0.309588
CARD8	125.583	3.0677	5.35534	0.00909084	0.309588
CHRDL1	55.0264	5.199	3.40382	0.00918928	0.309588
LAT2	104.287	4.67179	4.48044	0.00918952	0.309588
CD48	148.259	6.81277	4.44373	0.00918954	0.309588
FAM69A	105.341	5.75862	4.19321	0.00918954	0.309588
HSPA8	9586.81	409.9	4.54771	0.00918954	0.309588
EPAS1	3574.83	43.1388	6.37274	0.00918954	0.309588
PTPRD	91.7204	0.499873	7.51954	0.00923921	0.309588
MOGAT2	5.21427	3.11039	0.745368	0.00928458	0.309588
BHMT2	17.0202	1.56193	3.44584	0.00928916	0.309588
SMAP2	401.26	18.2044	4.46218	0.00928918	0.309588
TUSC5	32.2067	0.407129	6.30573	0.00938006	0.309588
T-Cell_Receptor_V-alpha_region	5.48462	1.14848	2.25567	0.00938873	0.309588
GJA5	161.597	3.61467	5.48239	0.00938977	0.309588
SLC9B2	436.456	3.86746	6.81831	0.00938978	0.309588
SDR16C5	179.192	5.75132	4.96147	0.00938978	0.309588
DNAJB5	118.938	9.44804	3.65405	0.00938978	0.309588
SASH3	173.256	8.74052	4.30904	0.00938978	0.309588
C20orf111	136.989	15.735	3.12202	0.00938979	0.309588
CPXM2	226.293	9.72212	4.54078	0.00949138	0.311112
ZNF423	102.774	2.89638	5.14908	0.00954248	0.311112
FER1L6	13.5525	5.43229	1.31892	0.00959389	0.311112
STON1-GTF2A1L	219.009	4.5893	5.57657	0.00959391	0.311112
LAX1	24.612	1.91482	3.68408	0.00959394	0.311112
ADRA2A	351.532	12.9954	4.75759	0.00959394	0.311112
CCRL1	121.23	2.96997	5.35116	0.00959394	0.311112
GPR34	56.7543	4.142	3.77633	0.00959394	0.311112
TNN	9.54406	0.81839	3.54374	0.00969741	0.311346
ADAP2	149.614	5.53217	4.75726	0.00969749	0.311346
SEC24A	1264.4	10.2941	6.9405	0.00969749	0.311346
TNXB	267.882	7.13636	5.23027	0.00969749	0.311346
PRPH2	11.9549	0.418058	4.83775	0.00974958	0.311346
TMTC1	75.1278	1.96144	5.25936	0.00980199	0.311346
ETHE1	785.855	56.3199	3.80255	0.00980203	0.311346
STAB1	727.447	8.36899	6.44165	0.00980203	0.311346
ANKRD33B	101.596	0.794232	6.99906	0.00980203	0.311346
PPAP2A	594.219	37.1116	4.00105	0.00980203	0.311346
C2orf88	45.1621	2.14583	4.39551	0.00990757	0.311346
CADM3	38.3076	1.97654	4.27658	0.0100141	0.311346
HCLS1	311.984	12.698	4.6188	0.0100141	0.311346
AKR1B10	424.913	98.9515	2.10238	0.0100141	0.311346
WASH6P	23.6556	2.11036	3.48662	0.0100141	0.311346
RASGRP2	19.9216	1.86319	3.41849	0.0100141	0.311346
CD37	231.885	13.2225	4.13235	0.0100141	0.311346
FBXL7	139.024	3.80564	5.19105	0.0100141	0.311346
VWA5A	254.344	8.08174	4.97597	0.0101217	0.311346
SLC35A4	1584.64	32.7432	5.59681	0.0101217	0.311346
CXCR1	48.4298	0.642146	6.23685	0.0101756	0.311346
PAQR6	3.25492	1.14047	1.51299	0.0101759	0.311346
TNFRSF13C	7.23392	3.55691	1.02415	0.0101759	0.311346
LOC723809	18.3326	1.24353	3.8819	0.0102273	0.311346
CDO1	14.654	1.28091	3.51606	0.0102303	0.311346
PPP1R16B	66.283	3.29927	4.32842	0.0102303	0.311346
ARHGAP25	89.5538	3.58592	4.64234	0.0102303	0.311346
PODN	554.567	24.8978	4.47727	0.0102303	0.311346
GCNT3	1118.85	44.9922	4.6362	0.0102303	0.311346
SYNE1	245.508	1.7742	7.11246	0.0102303	0.311346
CA2	1022.48	69.4775	3.87939	0.0102303	0.311346
BCL2L15	208.878	7.37055	4.82474	0.0103399	0.311346
TMEM106A	107.425	3.37474	4.99242	0.0103399	0.311346
KBTBD8	11.6361	0.727435	3.99965	0.0103399	0.311346
GPD1	187.315	7.51542	4.63947	0.01034	0.311346
EBI3	31.2162	3.24406	3.26642	0.01034	0.311346
PHACTR1	25.6461	0.662319	5.27507	0.0104506	0.311346
FECH	190.552	2.78839	6.09461	0.0104506	0.311346
ATP8B2	208.217	6.0231	5.11144	0.0104506	0.311346
AMICA1	48.8145	2.40195	4.34503	0.0104506	0.311346
TMEM99	23.1044	4.52455	2.35232	0.0104506	0.311346
WIPF1	711.807	13.6554	5.70395	0.0104506	0.311346
AK056817	134.072	3.50405	5.25784	0.0104506	0.311346
DUSP11	135.311	7.70262	4.13479	0.0105623	0.312313
MEMO1	142.205	9.16274	3.95605	0.0105624	0.312313
EPPK1	1269.85	16.5888	6.25831	0.0105624	0.312313
GLIPR2	234.68	7.27999	5.01061	0.0105624	0.312313
AY927512	55.7675	2.16276	4.68848	0.0106186	0.312449
TMPPE	80.8786	1.79132	5.49666	0.0106752	0.312449
FGF7	172.31	5.29818	5.02337	0.0106752	0.312449
NEGR1	73.273	3.58433	4.35351	0.0107319	0.312449
FZD4	194.262	5.24112	5.21199	0.010789	0.312449
CD300LF	48.7849	1.92823	4.66109	0.010789	0.312449
BLNK	142.406	13.1086	3.44142	0.010789	0.312449
SCUBE2	129.194	1.72617	6.22581	0.010789	0.312449
ITGA4	202.205	4.65727	5.44019	0.010789	0.312449
PPYR1	3.54752	1.2951	1.45375	0.010904	0.312449
KLRG1	7.23631	0.842809	3.10198	0.010904	0.312449
ZNF521	73.7837	2.19141	5.07337	0.010904	0.312449
SOX17	28.6286	2.2386	3.67679	0.010904	0.312449
HSPB6	506.222	251.726	1.00791	0.010904	0.312449
GMPPB	253.284	12.8265	4.30355	0.010904	0.312449
ETF1	1201.21	26.0092	5.52932	0.010904	0.312449
F13A1	405.557	7.69814	5.71925	0.010904	0.312449
PDE2A	31.0712	2.49847	3.63646	0.01102	0.313494
SLFN11	601.654	6.34944	6.56616	0.01102	0.313494
SDPR	58.6306	9.3276	2.65208	0.01102	0.313494
TXNDC15	367.314	11.3853	5.01177	0.01102	0.313494
MLN	5.18771	1.31167	1.9837	0.0110433	0.313591
SYNPO2	282.276	37.3202	2.91908	0.0111371	0.315069
CXorf21	13.9117	1.31763	3.40028	0.0111371	0.315069
ABCC9	92.6217	2.21468	5.38618	0.0112554	0.315069
PECAM1	348.234	16.0269	4.44149	0.0112554	0.315069
CNN1	798.976	274.361	1.54208	0.0112554	0.315069
GPR141	9.81826	0.576308	4.09055	0.0113735	0.315069
ROR1	89.9039	3.43447	4.71022	0.0113747	0.315069
TM6SF1	30.4912	2.38763	3.67474	0.0113747	0.315069
DAAM2	192.667	5.94904	5.01731	0.0113747	0.315069
ERAP1	1033.81	14.0147	6.20488	0.0113747	0.315069
SERPINB7	442.545	1.3937	8.31076	0.0114249	0.315069
CD226	13.4171	0.628907	4.41509	0.0114951	0.315069
SIGLEC8	16.0996	0.725856	4.4712	0.0114951	0.315069
ABCA9	34.9643	0.690093	5.66295	0.0114952	0.315069
AX747832	11.6284	0.626025	4.21529	0.0114952	0.315069
PCSK7	657.032	29.8753	4.45894	0.0114952	0.315069
CDH5	373.192	11.2175	5.05609	0.0114952	0.315069
PLCG2	94.9178	6.72269	3.81957	0.0114952	0.315069
SPATA18	25.502	1.94885	3.70991	0.0114952	0.315069
HARS2	247.221	7.7546	4.9946	0.0114952	0.315069
ANKRD44	53.6681	1.50586	5.1554	0.0116168	0.315292
GRAP2	12.5611	1.46902	3.09604	0.0116168	0.315292
ETS1	1195.58	20.5128	5.86505	0.0116168	0.315292
KLF2	729.309	69.8134	3.38495	0.0116168	0.315292
ANGPTL1	45.2585	4.3443	3.38099	0.0117395	0.315292
CCDC68	245.126	5.7485	5.4142	0.0117396	0.315292
MSH6	269.347	11.0283	4.61019	0.0117396	0.315292
LIFR	156.793	2.26104	6.11573	0.0117396	0.315292
SERPINB1	1943.76	141.312	3.78189	0.0117396	0.315292
NONO	1927.69	98.4309	4.29162	0.0117396	0.315292
ELANE	0.516271	6.54696	-3.66462	0.0118402	0.315292
LYST	173.928	1.72777	6.65343	0.0118634	0.315292
BCL6B	94.5496	3.86028	4.61429	0.0118634	0.315292
SLFN12L	12.8409	0.820017	3.96895	0.0118634	0.315292
PALMD	57.6962	4.29466	3.74786	0.0118635	0.315292
LHFP	370.318	17.5464	4.39952	0.0118635	0.315292
SNX18	338.036	6.11651	5.78832	0.0118635	0.315292
FOXF2	54.3757	11.6367	2.22428	0.0118635	0.315292
MOSPD1	48.6325	5.71425	3.08929	0.0119885	0.317011
STX11	75.6848	1.60148	5.56253	0.0119885	0.317011
MYL9	4003.37	830.927	2.26842	0.0119885	0.317011
KLF7	69.013	4.73354	3.86588	0.0120514	0.317684
TCRA	6.29894	0.726677	3.11572	0.0121147	0.317684
PTGIR	67.2764	2.15462	4.96459	0.0121147	0.317684
TMEM220	46.8365	2.04971	4.51414	0.0121147	0.317684
RAMP3	69.6791	9.96039	2.80645	0.0121147	0.317684
TRIM36	25.5197	1.39402	4.19428	0.0122421	0.317754
GRID1	36.4913	0.555328	6.03807	0.0122421	0.317754
FBXL5	512.539	20.1806	4.66662	0.0122421	0.317754
SYNPO	933.488	22.5176	5.37351	0.0122421	0.317754
PLA2G7	161.31	5.26779	4.9365	0.0122421	0.317754
GSTM5	13.6275	1.122	3.60238	0.0123706	0.317754
PLA2G10	65.5911	5.82174	3.49398	0.0123707	0.317754
CD79B	30.4479	8.31907	1.87185	0.0123707	0.317754
FUT2	1634.54	24.4817	6.06104	0.0123707	0.317754
ATP10D	189.496	2.92039	6.01986	0.0123707	0.317754
C7	263.098	21.794	3.5936	0.0123707	0.317754
CCL19	65.3336	25.5832	1.35263	0.0123707	0.317754
MYO1G	111.063	2.13798	5.69898	0.0125004	0.317754
BOC	155.138	4.16619	5.21868	0.0125004	0.317754
ZZEF1	507.829	5.93832	6.41814	0.0125005	0.317754
EBF1	81.0941	2.98195	4.76527	0.0125005	0.317754
TMED7-TICAM2	2734.61	19.3256	7.14468	0.0125005	0.317754
CCDC25	271.747	10.8305	4.6491	0.0125005	0.317754
LYN	1057.17	24.2012	5.44899	0.0125005	0.317754
FBLN5	367.678	14.814	4.63342	0.0126314	0.32005
FBN1	3966.23	15.2057	8.02701	0.0126314	0.32005
TRB	2.20514	0.927799	1.24898	0.0127617	0.32009
UBE2QL1	45.3222	0.374745	6.91816	0.0127635	0.32009
C1QTNF7	6.14888	1.37226	2.16377	0.0127636	0.32009
VPS37A	345.272	8.60986	5.3256	0.0127636	0.32009
CLDN23	179.37	20.3909	3.13694	0.0127636	0.32009
RBMX	720.204	29.7121	4.59928	0.0127636	0.32009
SHD	10.0895	0.698595	3.85225	0.0128276	0.32009
LRRC32	907.289	16.3949	5.79024	0.012897	0.32009
BIN2	107.679	4.27171	4.65578	0.012897	0.32009
LOC100129083	54.7772	3.73728	3.87351	0.012897	0.32009
ZFPM2	66.9193	1.47075	5.50779	0.012897	0.32009
SPN	81.6497	2.98915	4.77164	0.012897	0.32009
ITGB3	139.874	2.82456	5.62996	0.012897	0.32009
LMOD1	241.576	42.9529	2.49165	0.0130317	0.322237
PTPRB	155.779	3.15023	5.6279	0.0130317	0.322237
GATA2	93.4885	2.09584	5.47919	0.0130995	0.322237
BC073918	3.67141	0.898628	2.03054	0.0131675	0.322237
LSP1	535.228	25.1077	4.41395	0.0131676	0.322237
MOB3A	482.7	24.0291	4.32827	0.0131676	0.322237
ITPR1	118.715	3.08681	5.26523	0.0131676	0.322237
MON1A	175.251	4.67422	5.22855	0.0131676	0.322237
TNFAIP8	292.818	8.34126	5.13359	0.0131676	0.322237
GALNTL1	15.4247	0.720251	4.4206	0.0133047	0.323781
TRNT1	7.02858	1.57331	2.15943	0.0133047	0.323781
EDNRB	134.175	4.03078	5.05692	0.0133047	0.323781
LILRB3	124.723	1.232	6.66157	0.0134431	0.323781
IRF4	33.0953	2.02689	4.02929	0.0134431	0.323781
PORCN	67.3806	5.04017	3.74079	0.0134431	0.323781
LILRB5	38.8843	0.801789	5.59982	0.0134431	0.323781
ZNF671	8.63674	1.54677	2.48123	0.0134431	0.323781
PJA2	956.827	23.045	5.37573	0.0135128	0.323781
TLR10	3.33036	1.25918	1.40319	0.0135827	0.323781
PLXNC1	242.625	3.76771	6.0089	0.0135827	0.323781
EIF2B4	159.431	7.17164	4.47449	0.0135827	0.323781
LIMS2	171.986	13.3084	3.69189	0.0135827	0.323781
FBXL17	308.621	4.00755	6.26697	0.0135827	0.323781
CCL24	15.2153	8.97522	0.761507	0.0135828	0.323781
NPTX1	6.71877	1.93392	1.79667	0.0137237	0.323781
SLC9A9	46.861	2.19174	4.41824	0.0137237	0.323781
TIE1	184.747	4.44988	5.37564	0.0137237	0.323781
VCAM1	460.453	10.3247	5.47888	0.0137237	0.323781
A2M	3322.97	182.871	4.18357	0.0137237	0.323781
RHOJ	61.7008	5.34205	3.52982	0.0137237	0.323781
GATM	1045.71	23.026	5.50508	0.0137237	0.323781
CD209	193.908	3.31308	5.87106	0.0137237	0.323781
MARCH2	238.623	17.2779	3.78774	0.0137237	0.323781
MEOX2	22.9001	1.76807	3.69511	0.0138659	0.32519
COMMD10	134.422	10.6511	3.6577	0.0138659	0.32519
LY9	16.228	1.41206	3.52261	0.013866	0.32519
CYP1B1	844.099	9.60959	6.45679	0.013866	0.32519
OIP5-AS1	225.745	18.4368	3.61403	0.0140095	0.325287
ZNF135	11.3656	0.554137	4.35828	0.0140095	0.325287
E2F6	38.8872	2.70499	3.8456	0.0140095	0.325287
MRAS	192.45	3.9384	5.61073	0.0140095	0.325287
BANK1	13.5686	2.69861	2.32998	0.0140095	0.325287
VSIG1	1499.6	41.7056	5.16819	0.0140095	0.325287
PAEP	5.827	0.724359	3.00798	0.0141176	0.325287
KCNE4	335.609	4.23041	6.30984	0.0141543	0.325287
NAP1L5	25.6071	2.32459	3.46149	0.0141543	0.325287
VDAC1	3395.28	108.916	4.96225	0.0141544	0.325287
DD182001	175.612	91.1706	0.945748	0.0141544	0.325287
TRBV19	9.43239	1.87494	2.33078	0.0141544	0.325287
RBMS3	54.1127	2.06139	4.71428	0.0142272	0.325287
NBLA00301	8.93498	2.08166	2.10173	0.0143004	0.325287
CD84	196.541	2.79729	6.13466	0.0143005	0.325287
SLAMF1	17.408	0.915323	4.24933	0.0143005	0.325287
FMNL3	483.291	5.59028	6.43383	0.0143005	0.325287
NEUROG3	2.92951	0.889899	1.71894	0.0143327	0.325287
ZNF215	27.2023	0.595428	5.51366	0.014374	0.325287
IGSF6	97.467	5.95609	4.03248	0.0143741	0.325287
AB429224	8.2321	1.6213	2.34411	0.0144474	0.325287
GPR97	69.8275	0.717165	6.60535	0.014448	0.325287
FBXL22	17.1952	1.75266	3.29439	0.014448	0.325287
AKR7A3	414.156	61.5041	2.75142	0.014448	0.325287
CKMT1A	41.7284	4.88075	3.09585	0.014448	0.325287
FGD5	139.989	4.83809	4.85473	0.014448	0.325287
PTGER4	84.1402	8.65287	3.28154	0.014448	0.325287
TPD52	1099.36	39.2974	4.80608	0.014448	0.325287
SERPINA9	0.484614	3.68529	-2.92687	0.0145332	0.325384
ATG10	25.6769	1.14481	4.48729	0.0145968	0.325384
FUT4	589.719	10.3523	5.83201	0.0145969	0.325384
MSRB3	256.845	13.4547	4.25472	0.0145969	0.325384
ADCY4	34.4496	2.39011	3.84934	0.0145969	0.325384
MYCT1	31.0376	2.7509	3.49604	0.0145969	0.325384
SNHG7	97.6317	6.9551	3.81121	0.0145969	0.325384
FPR2	124.217	0.958046	7.01855	0.014747	0.326424
NGFR	79.3015	4.93963	4.00487	0.014747	0.326424
SORCS2	134.398	1.05748	6.98973	0.014747	0.326424
EMCN	47.5776	3.63699	3.70947	0.0147471	0.326424
MEF2C	134.753	5.4438	4.62956	0.0147471	0.326424
MS4A1	12.5393	5.76629	1.12075	0.0148985	0.327023
ASH2L	384.928	16.7418	4.52306	0.0148986	0.327023
GPR132	56.5266	1.82218	4.95519	0.0148986	0.327023
GPC6	466.452	3.42824	7.08812	0.0148986	0.327023
MAMDC2	7.53773	3.06626	1.29765	0.0148986	0.327023
PALM2-AKAP2	771.986	5.98454	7.01119	0.0148986	0.327023
OGN	72.7586	17.7845	2.0325	0.0150515	0.328549
DNAJC18	33.918	1.56793	4.43512	0.0150515	0.328549
TENC1	428.335	15.5882	4.78022	0.0150515	0.328549
AK126266	182.284	18.2664	3.31892	0.0150515	0.328549
LOC100125556	16.7172	1.62661	3.36139	0.0152058	0.330543
LST1	105.517	10.1757	3.37428	0.0152058	0.330543
EPHX2	178.713	10.8302	4.0445	0.0152058	0.330543
GIMAP8	77.2296	3.23097	4.57912	0.0153615	0.332552
COX7A2L	427.09	32.6808	3.70802	0.0153615	0.332552
FGL2	408.618	21.4265	4.25328	0.0153615	0.332552
SCN7A	2.63564	0.907915	1.53753	0.0154387	0.333332
INTU	27.4899	0.937552	4.87386	0.0154399	0.333332
NCAM1	18.4156	2.01358	3.19309	0.0155186	0.333661
AGMAT	223.846	10.3186	4.43918	0.0155186	0.333661
AK092048	32.5917	3.48611	3.22482	0.0155186	0.333661
DKFZp547J0510	443.867	6.28897	6.14116	0.0156771	0.33524
ATOH8	16.7432	0.73434	4.51098	0.0156771	0.33524
GPR116	272.602	5.25496	5.69697	0.0156771	0.33524
MAGI2-AS3	103.243	1.33018	6.27827	0.0156771	0.33524
MYO5A	160.286	2.27548	6.13833	0.015837	0.336461
ENPEP	105.751	2.8267	5.22541	0.0158371	0.336461
CLCA1	38.9044	8.2291	2.24113	0.0158574	0.336461
KLHL3	16.0583	0.463926	5.11328	0.0159175	0.336461
IL17C	292.933	1.15691	7.98416	0.0159942	0.336461
PSPH	97.7394	5.59544	4.12662	0.0159984	0.336461
ITIH5	102.024	5.50439	4.21218	0.0159984	0.336461
ESYT1	1149.45	28.7116	5.32317	0.0159984	0.336461
KANK3	29.2381	2.39952	3.60703	0.0159984	0.336461
CLDN5	69.4015	9.1106	2.92935	0.0159984	0.336461
NCF4	89.5246	7.12756	3.6508	0.0159984	0.336461
SWI5	56.1934	8.11073	2.7925	0.0159984	0.336461
FAT3	16.9185	0.300969	5.81285	0.0161608	0.336461
ATP1A2	6.23842	3.11266	1.00303	0.0161612	0.336461
TRAT1	12.7088	1.46985	3.11209	0.0161612	0.336461
JAM3	184.394	11.0979	4.05443	0.0161612	0.336461
KCNJ8	90.1697	4.57897	4.29955	0.0161612	0.336461
DLC1	326.583	5.47303	5.89897	0.0161612	0.336461
TSPAN11	78.5921	2.7276	4.84868	0.0161612	0.336461
CHMP7	486.025	11.9683	5.34374	0.0161612	0.336461
T-cell_receptor_IGR_b_14_Vbeta_13	1.92929	1.02649	0.910351	0.0163232	0.337097
UBA7	846.575	16.0712	5.71909	0.0163255	0.337097
CKMT2	6.50257	1.45508	2.15991	0.0163255	0.337097
IGFBP5	6712.95	111.804	5.9079	0.0163255	0.337097
SIGLEC1	231.902	2.93136	6.3058	0.0163255	0.337097
GNB4	350.371	8.12919	5.42963	0.0163255	0.337097
NFAM1	153.041	2.25789	6.0828	0.0164912	0.337097
NFKB1	953.212	14.4853	6.04013	0.0164912	0.337097
RASGRF2	106.396	1.10256	6.59245	0.0164912	0.337097
HMCN1	250.383	1.34114	7.54453	0.0164912	0.337097
TAGLN	4894.15	368.219	3.73242	0.0164912	0.337097
OSGIN1	70.7535	4.04954	4.12697	0.0164912	0.337097
PTGIS	696.314	13.4308	5.69611	0.0164912	0.337097
SELT	958.263	24.6272	5.2821	0.0164912	0.337097
ACTA2	5580.83	245.954	4.50402	0.0166584	0.339634
LOC100499467	88.1331	8.77852	3.32763	0.0166584	0.339634
LOC201651	2.72894	1.89853	0.523454	0.016827	0.34043
SGMS1	426.637	7.98256	5.74001	0.0168271	0.34043
MYH9	16653.4	181.307	6.52124	0.0168271	0.34043
ABI3BP	131.125	6.49843	4.33471	0.0168271	0.34043
CXCL13	180.961	30.7763	2.55579	0.0168271	0.34043
RBMX2	120.773	17.8838	2.75558	0.0168271	0.34043
SLC16A7	15.1462	0.876358	4.1113	0.016912	0.341215
NLGN4X	45.632	0.775593	5.8786	0.0169973	0.341215
PTRF	3369.21	73.288	5.52269	0.0169973	0.341215
ARHGAP30	199.531	6.20061	5.00806	0.0169973	0.341215
AK1	358.787	17.9599	4.32027	0.0169973	0.341215
CYLD	267.606	3.38672	6.30408	0.017169	0.341215
TMEM18	112.495	8.15003	3.78691	0.017169	0.341215
RASGEF1B	136.56	2.06029	6.05054	0.017169	0.341215
SLC25A4	385.714	9.0308	5.41653	0.017169	0.341215
MTUS1	1832.21	16.48	6.79673	0.017169	0.341215
PLAC9	23.5232	6.90628	1.7681	0.017169	0.341215
HYAL2	587.798	13.837	5.40871	0.017169	0.341215
ZCCHC24	265.144	11.3103	4.55107	0.0172554	0.341215
PRSS27	2.49464	3.02385	-0.277555	0.0173421	0.341215
ASPA	3.59211	0.859365	2.06349	0.0173421	0.341215
BC031864	7.51086	0.99671	2.91373	0.0173422	0.341215
ITGAL	190.943	6.57383	4.86027	0.0173422	0.341215
CPT1A	917.817	31.758	4.85301	0.0173422	0.341215
SLFN12	82.7639	1.58674	5.70486	0.0173422	0.341215
CYBRD1	894.809	30.709	4.86485	0.0173422	0.341215
GYPC	212.663	16.3458	3.70158	0.0173422	0.341215
RUNX1T1	49.7539	1.19348	5.38156	0.0173422	0.341215
NOS3	151.792	5.79455	4.71125	0.0174294	0.341245
PYGO1	12.1375	1.44359	3.07173	0.0175169	0.341245
KALRN	99.754	2.84894	5.12988	0.0175169	0.341245
SF3B4	829.627	54.4863	3.9285	0.017517	0.341245
EHBP1L1	1010.18	21.9249	5.5259	0.017517	0.341245
ATP2A3	619.447	38.1806	4.02007	0.017517	0.341245
AK097351	19.7597	4.3755	2.17504	0.017517	0.341245
LILRB1	76.4752	2.46429	4.95575	0.017517	0.341245
CCRN4L	146.497	2.97967	5.61958	0.0176049	0.342237
RHEBL1	7.67191	0.981332	2.96677	0.0176932	0.342237
C10orf54	809.889	16.7209	5.598	0.0176932	0.342237
MYLK-AS1	40.1354	10.3098	1.96087	0.0176932	0.342237
LOC100505495	20.2285	1.10489	4.19442	0.0177819	0.342237
OR56B1	17.5683	0.944466	4.21733	0.017871	0.342237
LOC100287216	38.855	1.51881	4.67709	0.017871	0.342237
BHLHE22	22.4183	0.659213	5.08778	0.017871	0.342237
NLRC3	33.0719	1.74591	4.24356	0.0178711	0.342237
SCARF1	82.045	3.11188	4.72056	0.0178711	0.342237
JAK3	154.553	4.51545	5.09709	0.0178711	0.342237
ADARB1	219.176	2.95766	6.21149	0.0178711	0.342237
TMEM100	6.53008	2.53684	1.36407	0.0180504	0.342237
FMO2	42.2906	3.4844	3.60136	0.0180505	0.342237
ITGAX	238.651	4.72539	5.65833	0.0180505	0.342237
TMEM171	172.005	11.5006	3.90267	0.0180505	0.342237
ELL2	321.263	7.89772	5.34617	0.0181407	0.342237
NAV3	25.923	0.350741	6.20769	0.0182314	0.342237
VIPR2	5.52946	1.16233	2.25012	0.0182314	0.342237
MYOCD	14.1641	3.50122	2.01631	0.0182314	0.342237
FBLN1	2570.5	26.4783	6.6011	0.0182314	0.342237
FAM78A	86.8525	2.88906	4.90989	0.0182314	0.342237
POU2AF1	98.448	11.9426	3.04325	0.0182315	0.342237
EMILIN1	2450.54	43.0377	5.83135	0.0182315	0.342237
MDFIC	190.192	5.908	5.00864	0.0182315	0.342237
OTC	12.1458	4.17979	1.53895	0.0183536	0.342237
CYP2C9	14.8915	1.45572	3.35468	0.0184138	0.342237
ARHGAP20	15.3239	0.502628	4.93015	0.0184139	0.342237
MAPK10	15.4286	1.00836	3.93552	0.018414	0.342237
GAS7	305.619	5.44532	5.81057	0.018414	0.342237
RSPRY1	209.793	8.26489	4.66583	0.018414	0.342237
ZNF579	118.063	11.2403	3.3928	0.018414	0.342237
SP140	161.312	2.66852	5.91767	0.018414	0.342237
TTC28	161.012	2.98442	5.75357	0.018414	0.342237
ADH5	564.134	22.5453	4.64514	0.018414	0.342237
GPR124	1150.41	16.2222	6.14803	0.018414	0.342237
ENG	1558.82	50.0688	4.9604	0.018414	0.342237
AMPH	18.6989	0.516156	5.179	0.0185059	0.342237
NOVA2	19.8547	1.40339	3.8225	0.0185982	0.342237
SYNJ2BP-COX16	555.252	11.8321	5.55237	0.0185982	0.342237
TNS1	1950.52	42.7232	5.5127	0.0185982	0.342237
MGAT3	122.749	5.35232	4.5194	0.0185982	0.342237
P2RY13	51.0117	1.99184	4.67866	0.0185982	0.342237
CSNK1G3	356.944	7.26936	5.61773	0.0185982	0.342237
NFATC1	244.333	3.96546	5.94522	0.0186909	0.342237
ADORA3	38.2946	1.52631	4.64902	0.0187839	0.342237
AVPR1A	31.553	0.608428	5.69655	0.0187839	0.342237
CD300E	62.5461	0.686337	6.50986	0.0187839	0.342237
DNM3	15.3981	0.675376	4.51092	0.018784	0.342237
RTKN2	23.9353	1.34705	4.15126	0.018784	0.342237
FAM110D	10.2767	1.65778	2.63205	0.018784	0.342237
AK123584	40.8733	1.92578	4.40765	0.018784	0.342237
TIMP3	5796.77	63.2037	6.5191	0.018784	0.342237
SPARCL1	679.278	120.196	2.49862	0.018784	0.342237
CDC42SE2	1101.65	16.1882	6.08858	0.018784	0.342237
GIMAP1-GIMAP5	131.181	3.90114	5.07152	0.018784	0.342237
CMAHP	24.5686	1.76076	3.80254	0.0188774	0.342877
ABCG2	9.46654	2.03098	2.22066	0.0189713	0.342877
ARL10	16.9099	0.679122	4.63805	0.0189713	0.342877
NCF1	51.8687	2.73706	4.24416	0.0189713	0.342877
LYVE1	41.0082	3.18545	3.68634	0.0189714	0.342877
TRMT6	116.494	8.06078	3.8532	0.0189714	0.342877
SLIT2	127.155	2.77594	5.51746	0.0189714	0.342877
MMP19	274.938	5.39288	5.67191	0.0191604	0.345106
MSH2	159.613	8.08693	4.30284	0.0191604	0.345106
PEX26	408.441	12.879	4.98704	0.0191604	0.345106
MAGEA3	0.0309214	5.80593	-7.55278	0.019205	0.345383
ST6GAL2	57.6146	0.321808	7.48409	0.0192542	0.345383
MAP1A	326.619	4.32588	6.23847	0.0192555	0.345383
ARL14	113.234	12.5257	3.17634	0.019351	0.345383
SCARA5	15.935	2.48825	2.67899	0.019351	0.345383
ARL6IP6	123.01	7.15772	4.10313	0.0193511	0.345383
MIR1281	14.4413	7.61734	0.922845	0.0193511	0.345383
MYLK	1035.64	55.4639	4.22283	0.0193511	0.345383
RERG	44.9604	6.27177	2.84171	0.0195434	0.346851
EPB41L4A	70.6145	2.26051	4.96524	0.0195434	0.346851
ACAP1	53.7381	4.12254	3.70434	0.0195434	0.346851
CFLAR-AS1	51.8414	2.879	4.17047	0.0195434	0.346851
LTB	339.001	20.8976	4.01988	0.0195434	0.346851
FREM1	23.8429	0.654076	5.18796	0.0196401	0.348175
PLA2G4F	63.4853	2.86264	4.47101	0.0197373	0.348187
AJ004954	10.7202	4.82711	1.1511	0.0197374	0.348187
THBS1	13193.5	80.5581	7.35558	0.0197374	0.348187
TLN2	341.64	3.54968	6.58864	0.0197374	0.348187
NUDT10	17.6374	0.325184	5.76124	0.0198313	0.348187
CLEC1A	12.2998	1.42234	3.11229	0.019933	0.348187
LRRK2	46.5654	0.876516	5.73133	0.019933	0.348187
TBC1D1	525.931	12.1316	5.43803	0.019933	0.348187
DKFZp686O16217	2895.53	1005.94	1.52528	0.0199331	0.348187
CXCR2	49.6123	1.36474	5.184	0.0201304	0.348187
GCNT2	289.9	1.23557	7.87424	0.0201304	0.348187
FLNC	427.417	41.3906	3.36827	0.0201304	0.348187
NTN4	310.324	8.95803	5.11445	0.0201304	0.348187
C16orf45	114.818	8.54557	3.74802	0.0201304	0.348187
GRB7	272.703	39.3248	2.79382	0.0201304	0.348187
NR3C1	363.71	5.29994	6.10067	0.0201304	0.348187
EXTL3	665.26	9.88411	6.07266	0.0202297	0.348187
NMUR1	7.56186	0.794537	3.25055	0.0203295	0.348187
EDEM1	548.817	9.76469	5.81261	0.0203295	0.348187
CSRP1	1978.14	101.627	4.28278	0.0203295	0.348187
FXYD1	22.1382	10.9035	1.02174	0.0203295	0.348187
PXK	109.014	5.98832	4.18622	0.0203295	0.348187
C4B	119.413	3.65518	5.02987	0.0203295	0.348187
GFRA1	25.0325	2.23252	3.48706	0.0205302	0.348187
FBLN7	45.2352	1.18139	5.25889	0.0205302	0.348187
STAP1	3.22199	1.11518	1.53068	0.0205303	0.348187
IL6R	139.824	4.11501	5.08657	0.0205303	0.348187
ST5	869.742	15.2283	5.83576	0.0205303	0.348187
FMNL1	379.557	7.96565	5.57438	0.0205303	0.348187
PPP6R2	301.299	12.7637	4.56108	0.0205303	0.348187
GZMK	36.8226	6.1998	2.5703	0.0205303	0.348187
DESI1	484.694	14.1792	5.09523	0.0206313	0.348187
PRICKLE2	220.933	3.58379	5.94598	0.0206313	0.348187
CLC	4.18129	1.58551	1.399	0.020638	0.348187
SLITRK4	28.4959	0.107431	8.0512	0.0207324	0.348187
CSMD2	147.063	0.235357	9.28737	0.0207325	0.348187
BC080555	3.38643	1.07816	1.6512	0.0207328	0.348187
DUSP12	57.2538	10.4462	2.4544	0.0207328	0.348187
APOBR	123.677	4.13999	4.9008	0.0207328	0.348187
SLC1A1	152.179	6.82095	4.47965	0.0207328	0.348187
OLFML3	599.779	18.1719	5.04465	0.0207328	0.348187
PIK3CD	166.496	4.47712	5.21677	0.0207328	0.348187
PRELP	400.152	16.4185	4.60715	0.0207328	0.348187
IL1R1	841.911	17.7642	5.56662	0.0207328	0.348187
SHANK3	251.225	6.92247	5.18155	0.0207328	0.348187
FAM189A2	54.8037	3.5096	3.96489	0.0207328	0.348187
C19orf59	27.1664	0.744647	5.18912	0.0209368	0.348187
GPR157	23.6437	1.16947	4.33753	0.020937	0.348187
AX746478	12.8434	1.41829	3.17881	0.020937	0.348187
NRXN2	49.0031	1.10431	5.47166	0.020937	0.348187
ADCY9	513.689	6.72531	6.25515	0.020937	0.348187
CCR7	24.2179	4.25539	2.50871	0.020937	0.348187
LNPEP	139.395	4.33536	5.00688	0.020937	0.348187
AX747586	2.57924	0.997158	1.37105	0.020937	0.348187
LONP2	453.757	15.6163	4.8608	0.0209371	0.348187
BCL2	61.5104	2.31052	4.73454	0.0209371	0.348187
ADAM19	416.026	6.29064	6.04732	0.0209371	0.348187
AFF4	1679.34	12.4015	7.08124	0.0209371	0.348187
ZFY	0.715721	1.24709	-0.8011	0.0209797	0.348187
STAT4	19.8157	0.789797	4.64902	0.021143	0.348187
UNC5C	34.5858	0.762143	5.50397	0.021143	0.348187
APLNR	345.999	12.7869	4.75804	0.0211431	0.348187
MRVI1	235.574	12.3511	4.25347	0.0211431	0.348187
CIITA	419.02	7.97959	5.71456	0.0211431	0.348187
SERPINF1	2305.49	73.2896	4.97532	0.0211431	0.348187
LILRB2	148.077	3.32443	5.4771	0.0211431	0.348187
MRPS26	211.759	37.9072	2.48188	0.0211431	0.348187
C5orf24	701.308	12.5126	5.8086	0.0211431	0.348187
CNR1	3.84646	0.860216	2.16076	0.0213507	0.348701
CD200R1	10.1197	0.711202	3.83076	0.0213508	0.348701
CPM	165.108	6.11421	4.7551	0.0213508	0.348701
SSC5D	334.709	8.19037	5.35283	0.0213508	0.348701
VAV1	124.496	4.37987	4.82907	0.0213508	0.348701
DOK3	118.027	4.70052	4.65016	0.0213508	0.348701
ID4	103.817	7.69825	3.75337	0.0213508	0.348701
ARRB1	352.773	9.56953	5.20415	0.0215604	0.348701
CD300C	27.9544	1.08212	4.69114	0.0215604	0.348701
SRFBP1	148.725	4.19505	5.14781	0.0215604	0.348701
FAM82B	228.615	12.4188	4.20232	0.0215604	0.348701
CCDC159	33.041	3.30797	3.32024	0.0216658	0.348701
TRBV4-1	3.55369	1.1353	1.64624	0.0217689	0.348701
CDH23	20.5811	0.334874	5.94156	0.0217716	0.348701
LDB3	7.49167	2.31512	1.6942	0.0217716	0.348701
ZNF154	8.86948	1.22855	2.85189	0.0217716	0.348701
ANO5	54.2651	1.11175	5.60912	0.0217717	0.348701
RARB	28.9905	1.30105	4.47783	0.0217717	0.348701
CXCL5	2227.41	63.7906	5.12588	0.0217717	0.348701
KCNMA1	98.8932	5.14189	4.2655	0.0217717	0.348701
MEOX1	14.7749	1.80757	3.03103	0.0217717	0.348701
PCDHB4	25.7187	1.08931	4.56134	0.0217717	0.348701
HSPB7	48.2641	16.752	1.52661	0.0217717	0.348701
PRKACB	138.809	5.83243	4.57286	0.0217717	0.348701
CASP1	983.792	12.8916	6.25385	0.0217717	0.348701
PLEKHO2	433.013	11.8465	5.19187	0.0217717	0.348701
CALCRL	153.346	6.06402	4.66037	0.0217717	0.348701
LEPR	93.0509	2.86066	5.0236	0.021878	0.349275
GMEB1	112.677	4.26587	4.7232	0.0219848	0.349275
MPHOSPH10	141.401	10.9052	3.69671	0.0219848	0.349275
HEYL	296.732	9.49674	4.96558	0.0219848	0.349275
CCDC3	195.166	6.91857	4.81809	0.0219848	0.349275
PLCE1	166.197	3.12521	5.7328	0.0219848	0.349275
FAM124A	53.9066	1.52075	5.14761	0.0219848	0.349275
RASAL3	87.8741	4.16148	4.40027	0.0219848	0.349275
RASSF10	0.731336	2.41651	-1.72432	0.0220882	0.349519
HHIP	4.42247	0.95663	2.20882	0.0221997	0.349519
CD19	9.41069	2.74642	1.77675	0.0221997	0.349519
XYLT1	277.833	3.76727	6.20455	0.0221997	0.349519
ADAMTS10	61.8525	1.66907	5.21171	0.0221997	0.349519
MTHFR	262.491	4.88507	5.74774	0.0221998	0.349519
VPS72	231.976	23.3608	3.31181	0.0221998	0.349519
MYADM	2352.76	99.5071	4.56341	0.0221998	0.349519
GRAMD4	138.699	10.8598	3.67489	0.0221998	0.349519
HIST1H3G	12.3574	1.34177	3.20316	0.0224112	0.351178
MAGI2	52.5979	0.681323	6.27052	0.0224164	0.351178
VWF	974.648	20.8668	5.5456	0.0224165	0.351178
RAB11FIP1	2281.06	22.1891	6.68371	0.0224165	0.351178
MPDZ	93.2454	2.32397	5.32637	0.0224165	0.351178
MYH11	1032.12	294.959	1.80702	0.0226351	0.352849
SETBP1	47.4725	2.18669	4.44027	0.0226351	0.352849
DACT3	83.579	4.48387	4.22032	0.0226351	0.352849
RASIP1	64.9228	4.0027	4.01968	0.0226351	0.352849
AL355711	11.3725	2.14974	2.40332	0.0226351	0.352849
ACACB	74.7106	3.76389	4.31102	0.0227451	0.353764
PIK3C2G	154.09	3.05587	5.65604	0.0228467	0.353764
CRTAC1	7.48086	0.823286	3.18374	0.0228555	0.353764
ADAM23	22.2595	1.01442	4.45569	0.0228556	0.353764
TRIB3	288.237	12.6508	4.50995	0.0228556	0.353764
GGT1	138.906	7.80752	4.1531	0.0228556	0.353764
GYG2	76.777	2.69756	4.83095	0.0228556	0.353764
AK096932	54.9034	0.987647	5.79676	0.0228734	0.353764
IL18RAP	13.0517	0.502793	4.69813	0.0230778	0.354491
GNG7	13.8651	2.47785	2.4843	0.0230779	0.354491
ZNF852	20.7711	1.62017	3.68036	0.0230779	0.354491
DYSF	421.334	5.05352	6.38153	0.0230779	0.354491
SCNM1	126.436	10.3368	3.61254	0.0230779	0.354491
DNTTIP1	224.672	38.1387	2.5585	0.0230779	0.354491
GPT	43.5261	5.10895	3.09078	0.0230779	0.354491
LOC100130950	10.2286	1.16769	3.13088	0.0233021	0.35551
PDE4D	173.029	1.97538	6.45274	0.0233021	0.35551
LOC339290	46.2452	4.4417	3.38012	0.0233021	0.35551
ANK2	31.7529	1.53005	4.37524	0.0233021	0.35551
DCHS1	496.723	5.82861	6.41315	0.0233021	0.35551
ASB2	19.8975	4.71606	2.07693	0.0233021	0.35551
FAM149A	57.0121	2.46862	4.52949	0.0233021	0.35551
JA202352	5.04028	1.98475	1.34455	0.0234828	0.356886
CES3	183.443	5.17106	5.14873	0.0235281	0.356886
MAP4K1	45.2627	4.40133	3.36231	0.0235282	0.356886
CATSPERB	25.3597	0.923871	4.7787	0.0235282	0.356886
PFDN4	83.2524	18.2086	2.19287	0.0235282	0.356886
NXT2	123.333	7.2555	4.08734	0.0235282	0.356886
PEG3	16.8946	0.694705	4.60401	0.0236417	0.357591
PNOC	7.30541	0.86256	3.08227	0.023756	0.357591
KIF26A	60.3965	4.69329	3.6858	0.0237562	0.357591
WAS	171.045	9.81354	4.12345	0.0237562	0.357591
FAM46C	114.486	7.19559	3.99191	0.0237562	0.357591
CRYL1	201.042	17.1505	3.55118	0.0237562	0.357591
AK092965	1392.47	28.498	5.61064	0.0237562	0.357591
FBLN2	2424.27	16.8456	7.16903	0.0237562	0.357591
POU6F1	47.4228	1.36043	5.12344	0.0239861	0.358994
FAM13C	23.7339	1.8809	3.65746	0.0239861	0.358994
ALDH3A1	154.069	17.9254	3.1035	0.0239861	0.358994
IGFBP4	5939.22	258.803	4.52035	0.0239861	0.358994
SIGLEC9	48.7465	1.42719	5.09405	0.0239861	0.358994
CTGF	5637.29	101.865	5.79027	0.0239861	0.358994
EBF2	28.5465	0.400043	6.15702	0.0241013	0.359054
CH25H	65.1376	4.11701	3.98382	0.0242179	0.359054
PLD4	10.1098	3.61634	1.48314	0.0242179	0.359054
ZNF101	41.4749	5.3496	2.95474	0.0242179	0.359054
VIM	7844.57	373.347	4.3931	0.0242179	0.359054
TPM1	2581.63	115.591	4.48118	0.0242179	0.359054
ZNF71	58.087	2.00838	4.85411	0.0242179	0.359054
STK17B	263.848	9.69295	4.76663	0.0242179	0.359054
WDR54	50.4332	7.9169	2.67136	0.0242179	0.359054
OGDH	1089.89	41.2485	4.7237	0.0242179	0.359054
DMD	41.7351	2.40894	4.11479	0.0244516	0.360823
EFHA2	7.08682	0.690678	3.35905	0.0244516	0.360823
CHL1	160.306	0.80753	7.6331	0.0244517	0.360823
HSPB8	113.489	29.9103	1.92384	0.0244517	0.360823
MSN	4363.91	82.1148	5.73183	0.0244517	0.360823
ZNF570	7.45721	0.938704	2.98989	0.0246873	0.362714
SERP1	2725.75	55.7007	5.61282	0.0246874	0.362714
CAV1	365.601	21.8122	4.06707	0.0246874	0.362714
RELL1	273.222	9.4207	4.8581	0.0248059	0.362714
abParts	44.1041	14.6685	1.58819	0.0249229	0.362714
ST7L	40.5154	2.87414	3.81727	0.0249251	0.362714
LRRC66	6.01139	2.26777	1.40642	0.0249251	0.362714
ALOX5AP	507.276	19.9841	4.66584	0.0249251	0.362714
COQ9	432.976	13.895	4.96165	0.0249251	0.362714
ZNF205	103.257	7.6615	3.75247	0.0249251	0.362714
FIZ1	116.251	3.50503	5.05167	0.0249251	0.362714
PREX1	513.246	6.9946	6.19727	0.0249251	0.362714
CHST2	144.393	4.11241	5.13387	0.0249251	0.362714
TLR3	209.975	4.23243	5.63259	0.0249251	0.362714
PDK4	241.781	31.2913	2.94987	0.0249251	0.362714
SIGLEC10	290.753	4.56423	5.99328	0.0251647	0.364184
LOC648987	55.0667	1.05427	5.70686	0.0251647	0.364184
NUDT18	88.4693	3.23818	4.77192	0.0251647	0.364184
PLEKHG4	63.6904	4.06721	3.96896	0.0251647	0.364184
CDC42EP5	1240.6	86.9046	3.83546	0.0251647	0.364184
PGGT1B	162.798	5.35828	4.92517	0.0251647	0.364184
ITGA8	10.3507	4.38476	1.23915	0.0252853	0.365
PPP1R1A	59.2867	4.33646	3.77312	0.0254063	0.365
IL2RA	174.927	2.39244	6.19212	0.0254064	0.365
MRGPRF	143.481	19.0158	2.91559	0.0254064	0.365
MYO9B	1314.14	17.4695	6.23313	0.0254064	0.365
ABHD12	427.382	37.8172	3.49841	0.0254064	0.365
SLC4A7	188.036	3.96575	5.56727	0.0254064	0.365
NOTCH4	170.966	2.76102	5.95237	0.0254064	0.365
MGC39372	21.5474	1.48825	3.85582	0.025528	0.365502
MIR205HG	0.000935714	2.54281	-11.4081	0.0255697	0.365502
ANO1	533.149	23.4807	4.50499	0.0256501	0.365502
GLT8D2	165.305	5.42249	4.93003	0.0256501	0.365502
FAM20A	200.37	1.87436	6.74012	0.0256501	0.365502
SUMO2	841.75	101.206	3.05609	0.0256501	0.365502
RHOB	2523.9	184.61	3.7731	0.0256501	0.365502
CARD6	128.859	5.06886	4.66798	0.0256501	0.365502
MAP1B	346.964	8.62389	5.3303	0.0256501	0.365502
GREB1	24.7603	0.525784	5.55742	0.0257726	0.365696
NLRC4	18.9166	0.546448	5.11343	0.0258956	0.365696
LOC153684	16.3242	1.0179	4.00335	0.0258956	0.365696
TPTEP1	16.2704	1.14409	3.82998	0.0258957	0.365696
PDE10A	55.7655	0.850085	6.03562	0.0258957	0.365696
SCUBE1	6.10847	1.42619	2.09865	0.0258957	0.365696
ADD1	1394.22	21.2238	6.03763	0.0258957	0.365696
PDLIM3	390.339	24.9685	3.96655	0.0258957	0.365696
GSN	2062.64	97.743	4.39936	0.0258957	0.365696
TMEM47	216.718	10.091	4.42468	0.0258957	0.365696
FNDC5	12.5991	0.881424	3.83734	0.0261434	0.367876
MAP4	2775.49	21.2919	7.0263	0.0261435	0.367876
MARCH3	69.53	2.89132	4.58783	0.0261435	0.367876
WDR55	422.461	11.4468	5.2058	0.0261435	0.367876
FDCSP	34.458	27.8357	0.307902	0.0263888	0.368104
NKX2-3	11.9793	0.967742	3.62978	0.0263931	0.368104
LAMA2	147.179	3.14151	5.54997	0.0263932	0.368104
MFN2	875.299	24.8398	5.13905	0.0263932	0.368104
ETV4	27.9885	16.3819	0.77273	0.0263932	0.368104
ZC3H7B	1109.3	12.3775	6.48579	0.0263932	0.368104
MFI2-AS1	15.3599	3.43279	2.16172	0.0263932	0.368104
LOC255130	572.167	47.1079	3.60239	0.0263932	0.368104
FAM20C	534.87	19.1592	4.80308	0.0263932	0.368104
SDK1	228.09	1.74851	7.02734	0.0263932	0.368104
NICN1	49.7	2.994	4.0531	0.0265188	0.369003
TCR-alpha	4.26387	1.82478	1.22444	0.0266449	0.369003
C15orf57	148.892	5.1451	4.85492	0.026645	0.369003
SNORD4B	1.30164	1.73458	-0.414255	0.026645	0.369003
MFSD3	132.899	13.1514	3.33704	0.026645	0.369003
UBXN8	78.8044	4.84851	4.02266	0.026645	0.369003
NAP1L3	16.2388	0.784298	4.3719	0.026645	0.369003
POPDC2	27.832	4.73721	2.55463	0.026645	0.369003
WISP2	78.9056	1.09072	6.17678	0.0268988	0.370209
LDHD	188.563	6.37583	4.88629	0.0268989	0.370209
ANKHD1-EIF4EBP3	1454.85	21.6924	6.06753	0.0268989	0.370209
TRBV29-1	4.63939	2.09559	1.14658	0.0271543	0.370209
TNFRSF13B	2.84363	1.07843	1.39881	0.0271547	0.370209
ZNF626	13.757	0.723735	4.24856	0.0271549	0.370209
ADAM33	15.205	2.17458	2.80574	0.0271549	0.370209
GGTA1P	34.7595	1.28273	4.76012	0.0271549	0.370209
AHNAK	6019.02	60.2679	6.642	0.0271549	0.370209
LRP1	8376.87	33.103	7.98331	0.0271549	0.370209
SDS	156.957	7.05352	4.47588	0.0271549	0.370209
NDUFAF1	72.1928	5.67089	3.67021	0.0271549	0.370209
CES2	660.364	62.0514	3.41173	0.0271549	0.370209
ACAA2	825.739	41.5021	4.31443	0.0271549	0.370209
RTKN	228.782	15.5955	3.87477	0.0271549	0.370209
CCR6	156.035	2.64295	5.88357	0.0271549	0.370209
HTATSF1	269.531	19.6241	3.77975	0.0271549	0.370209
LRCH2	18.3554	0.803992	4.51288	0.0271549	0.370209
GPR128	20.9823	3.48915	2.58822	0.0274107	0.371478
TMEM156	5.80634	1.15407	2.33089	0.0274129	0.371478
FCGR2B	90.9817	2.73394	5.05652	0.027413	0.371478
LOC100505812	11.3216	1.80486	2.64912	0.027413	0.371478
HCK	323.537	8.45513	5.25796	0.027413	0.371478
ABCG1	204.292	5.96929	5.09693	0.027413	0.371478
STEAP4	91.1601	4.21858	4.43357	0.027413	0.371478
BPIFB2	0.0105357	15.6462	-10.5363	0.0276632	0.373398
CLEC4A	30.5624	1.99441	3.93773	0.0276732	0.373398
MFAP4	597.565	98.4482	2.60166	0.0276732	0.373398
KLHL18	196.154	3.33237	5.87929	0.0276732	0.373398
OPLAH	397.221	12.4532	4.99535	0.0276732	0.373398
GSTA1	34.0725	19.3983	0.812681	0.0279354	0.374692
FHL5	10.1189	1.21633	3.05644	0.0279355	0.374692
CYP4X1	91.8238	3.12638	4.8763	0.0279355	0.374692
PPP1R12B	325.249	27.201	3.57982	0.0279355	0.374692
CALM1	2738.14	108.883	4.65234	0.0279355	0.374692
PARVG	69.9497	2.96043	4.56244	0.0279355	0.374692
NCR3	6.35318	0.829588	2.93701	0.0279355	0.374692
CD3G	27.9785	2.49976	3.48446	0.0281999	0.375364
ABCB1	12.9698	2.05399	2.65866	0.0281999	0.375364
CLIP3	176.495	10.9412	4.01179	0.0281999	0.375364
CD200	122.683	4.79717	4.6766	0.0281999	0.375364
FNBP1	235.475	9.85564	4.57848	0.0281999	0.375364
TREX2	11.9599	1.89238	2.65993	0.0281999	0.375364
L3MBTL2	391.808	10.7981	5.18129	0.0281999	0.375364
GUCY1A3	265.636	8.0043	5.05253	0.0281999	0.375364
FAM188B	5156.06	39.1409	7.04145	0.0281999	0.375364
NPR1	53.0543	2.44097	4.44194	0.0284665	0.376686
BC073932	26.1685	2.53948	3.36523	0.0284665	0.376686
KCNK5	309.277	9.89335	4.9663	0.0284665	0.376686
AX748062	1903.59	125.151	3.92698	0.0284665	0.376686
KANK2	541.273	22.4136	4.59391	0.0284665	0.376686
C4orf34	163.242	16.7882	3.28149	0.0284665	0.376686
PGM5	42.9101	17.9277	1.25913	0.0284665	0.376686
AGR3	179.509	67.0268	1.42125	0.0287348	0.377489
HRH2	23.7623	0.620753	5.25851	0.0287352	0.377489
CRLF1	16.8795	2.48301	2.76511	0.0287352	0.377489
CCL28	57.4977	7.12059	3.01344	0.0287353	0.377489
KCTD9	229.814	8.09394	4.82748	0.0287353	0.377489
NET1	1086.15	46.7978	4.53664	0.0287353	0.377489
CBX7	136.586	12.9549	3.39824	0.0287353	0.377489
SLC30A9	398.71	16.9472	4.55622	0.0287353	0.377489
BVES	22.6497	2.26939	3.31912	0.0288704	0.377489
HDAC8	87.0948	3.30317	4.72067	0.0290063	0.377489
DNAJB4	139.796	7.54007	4.2126	0.0290063	0.377489
PTAFR	343.273	7.45677	5.52466	0.0290063	0.377489
C19orf46	3.07361	2.57731	0.254069	0.0290063	0.377489
GUCY1B3	173.81	8.05362	4.43173	0.0290063	0.377489
WDR1	2854.04	56.1583	5.66737	0.0290063	0.377489
CDKL3	1770.34	22.0675	6.32596	0.0290063	0.377489
RAPGEF6	572.659	3.76722	7.24803	0.0290063	0.377489
DENND4C	407.592	7.3149	5.80014	0.0290063	0.377489
LOC100507346	13.2138	2.63402	2.3267	0.0290063	0.377489
FLNA	10402.3	367.936	4.82131	0.0290063	0.377489
SLC25A34	4.63464	0.98617	2.23255	0.0291425	0.377923
STC1	401.115	10.7415	5.22274	0.0291426	0.377923
CR749668	13.9659	0.39595	5.14045	0.0292794	0.377923
ATP1B2	8.24355	1.63524	2.33376	0.0292794	0.377923
LOC401093	76.1778	3.32746	4.51688	0.0292794	0.377923
YWHAQ	1679.14	136.473	3.62103	0.0292794	0.377923
LARS2	222.308	6.22361	5.15867	0.0292794	0.377923
LRCH3	194.652	6.245	4.96205	0.0292794	0.377923
LCP2	517.626	10.5397	5.618	0.0292794	0.377923
ACER2	36.5134	5.17623	2.81845	0.0292794	0.377923
C1orf167	35.3961	1.95562	4.17789	0.0295547	0.379612
LOC100128252	27.0231	3.31188	3.02847	0.0295548	0.379612
TNFRSF6B	5687.73	28.3047	7.65066	0.0295548	0.379612
NUDT12	200.347	4.18661	5.58058	0.0295548	0.379612
IL3RA	53.9466	4.66443	3.53176	0.0295548	0.379612
XK	139.042	4.68148	4.89241	0.0295548	0.379612
ACTRT3	25.9427	0.852402	4.92765	0.0298323	0.380695
AF268386	245.75	8.43814	4.86412	0.0298324	0.380695
CSF1	1376.75	13.2239	6.70197	0.0298324	0.380695
SULT1A1	45.334	7.6804	2.56134	0.0298324	0.380695
ABCC3	2361.87	21.5942	6.77314	0.0298324	0.380695
FANCL	72.7173	10.9825	2.72709	0.0298324	0.380695
FILIP1L	448.644	24.66	4.18532	0.0298324	0.380695
CPNE5	45.8917	3.76436	3.60776	0.0298324	0.380695
HMGCS2	104.437	43.778	1.25436	0.0301106	0.38118
NAT8B	7.8002	2.48169	1.65219	0.0301111	0.38118
CNTN1	23.766	1.45449	4.03032	0.0301112	0.38118
AK5	68.7744	0.181613	8.56486	0.0301118	0.38118
NR0B2	31.069	12.461	1.31805	0.0301121	0.38118
FILIP1	28.1396	2.44514	3.52462	0.0301122	0.38118
NDE1	516.024	37.945	3.76546	0.0301122	0.38118
PLEK	865.455	10.6178	6.3489	0.0301122	0.38118
FKBP5	372.064	6.03342	5.94643	0.0301122	0.38118
SFRP1	140.466	7.46634	4.23367	0.0301122	0.38118
PKIA	14.0397	1.29455	3.43899	0.0303942	0.382513
HEXIM2	13.5708	2.34472	2.53302	0.0303943	0.382513
URI1	324.1	30.7358	3.39845	0.0303943	0.382513
ZNF133	44.0425	3.87071	3.50823	0.0303943	0.382513
SUMO1	376.014	41.8532	3.16738	0.0303943	0.382513
GCNT1	105.93	9.41093	3.49263	0.0303943	0.382513
NKX6-2	5.27982	4.30955	0.292951	0.0304842	0.382513
LOC100233209	13.8727	1.54011	3.17114	0.0306786	0.382513
LAYN	52.5007	3.82744	3.77789	0.0306786	0.382513
EIF4EBP3	78.7757	16.534	2.25231	0.0306786	0.382513
FAM180A	25.8413	1.39278	4.21364	0.0306786	0.382513
FABP4	265.124	9.8485	4.75062	0.0306786	0.382513
HSPG2	10053.3	69.8003	7.17021	0.0306787	0.382513
TNFAIP8L2	38.6068	3.57125	3.43435	0.0306787	0.382513
CDKL1	24.5903	0.808288	4.92708	0.0306787	0.382513
RIN3	261.377	7.56442	5.11076	0.0306787	0.382513
PEAK1	692.337	5.04248	7.1012	0.0306787	0.382513
VRK2	142.721	8.32552	4.09952	0.0306787	0.382513
SLC22A5	155.725	5.40471	4.84864	0.0306787	0.382513
MMP23B	9.23901	0.696026	3.73053	0.0308216	0.383619
C6orf15	0.0208786	1.7043	-6.35101	0.0309165	0.383619
C1QTNF2	5.13711	1.00445	2.35455	0.0309652	0.383619
ITGBL1	313.837	7.26642	5.43263	0.0309653	0.383619
AK057177	56.1446	2.36693	4.56806	0.0309653	0.383619
ZNF70	51.3025	1.99512	4.68448	0.0309653	0.383619
SGCD	83.712	2.76101	4.92217	0.0309653	0.383619
WHSC1L1	749.99	8.71817	6.4267	0.0309653	0.383619
SLC5A5	35.2724	5.6293	2.64751	0.0312534	0.383619
RASGRP1	251.639	2.23591	6.81435	0.0312542	0.383619
THBS4	177.038	25.7322	2.78241	0.0312542	0.383619
SLC16A1	1201.69	16.3241	6.20191	0.0312542	0.383619
CASP7	517.334	17.28	4.90392	0.0312542	0.383619
LCP1	1392.97	32.0846	5.44014	0.0312542	0.383619
AX747968	53.585	7.37896	2.86034	0.0312542	0.383619
GNAO1	36.7477	3.71973	3.30438	0.0312542	0.383619
STAT3	8704.01	57.2107	7.24925	0.0312542	0.383619
LYL1	42.9292	4.03967	3.40965	0.0312542	0.383619
TNRC6B	356.156	4.70072	6.24348	0.0312542	0.383619
SURF2	73.6941	15.6913	2.23158	0.0312542	0.383619
HTR2A	13.8074	0.398522	5.11464	0.0315451	0.384214
AX747977	4.97711	2.08135	1.25779	0.0315454	0.384214
CES1	54.6858	12.6149	2.11604	0.0315454	0.384214
STARD9	17.2899	0.890979	4.2784	0.0315454	0.384214
MGST3	565.681	72.5694	2.96255	0.0315455	0.384214
ATP9B	248.259	2.31759	6.74308	0.0315455	0.384214
LY75-CD302	457.753	8.67525	5.72152	0.0315455	0.384214
TBX18	28.499	0.369923	6.26754	0.0318371	0.384214
NACAD	27.5605	1.20409	4.51659	0.0318389	0.384214
SFSWAP	213.417	6.1854	5.10866	0.031839	0.384214
C22orf39	85.6759	5.71905	3.90504	0.031839	0.384214
FAIM3	51.2535	6.10986	3.06844	0.031839	0.384214
PRDX6	1114.22	101.249	3.46007	0.031839	0.384214
SYTL2	152.074	6.94971	4.45168	0.031839	0.384214
C1R	4975.51	97.5745	5.6722	0.031839	0.384214
C14orf43	599.383	7.00624	6.41869	0.031839	0.384214
ACP1	374.181	27.2443	3.77971	0.031839	0.384214
ECSCR	33.3469	5.82026	2.5184	0.031839	0.384214
SLC9A3	197.605	19.1044	3.37064	0.031839	0.384214
ZNF117	25.6693	4.61751	2.47486	0.031839	0.384214
DOK2	84.9327	5.42918	3.96751	0.031839	0.384214
ALDH1A1	3006.14	98.3529	4.9338	0.031839	0.384214
SH2D1A	15.6557	1.43422	3.44835	0.0321348	0.386601
CD79A	168.753	49.7646	1.76172	0.0321349	0.386601
CXCR4	497.638	38.6362	3.68707	0.0321349	0.386601
GIMAP4	193.003	14.9268	3.69265	0.0321349	0.386601
LSAMP	105.337	1.88239	5.8063	0.0322837	0.387526
C10orf112	3.92281	1.66867	1.23319	0.0323712	0.387526
PRIMA1	8.41772	4.16154	1.01631	0.0324321	0.387526
SCML4	32.7428	0.623318	5.71507	0.0324331	0.387526
OLFML1	103.89	4.61481	4.49265	0.0324332	0.387526
SAMD4A	161.402	2.55476	5.98132	0.0324332	0.387526
SLC8A1	101.61	3.18087	4.99748	0.0324332	0.387526
CCDC80	1890.96	35.587	5.73162	0.0324332	0.387526
SSR3	2412.85	50.6957	5.57273	0.0324332	0.387526
ERV3-1	58.2066	8.69675	2.74264	0.0325832	0.387883
CD33	26.5075	0.561644	5.5606	0.0327336	0.387883
SPIB	26.9907	10.7175	1.33249	0.0327338	0.387883
PDE5A	206.28	6.95935	4.88951	0.0327338	0.387883
C8orf80	5.82777	0.729272	2.99842	0.0327338	0.387883
ELTD1	130.139	6.36102	4.35466	0.0327338	0.387883
FAM129A	229.451	16.5386	3.79428	0.0327338	0.387883
BIRC3	3129.01	18.5007	7.40198	0.0327338	0.387883
SEZ6L2	726.366	28.6141	4.6659	0.0327338	0.387883
LTBP4	746.169	42.104	4.14747	0.0327338	0.387883
CD96	73.8886	2.60554	4.8257	0.0327338	0.387883
MEG3	23.0744	1.4206	4.02172	0.0330368	0.388843
LYRM7	128.788	3.65506	5.13896	0.0330368	0.388843
GATA4	598.629	29.894	4.32373	0.0330368	0.388843
BCL2L14	94.0851	5.87581	4.00111	0.0330368	0.388843
PAPLN	43.7587	3.63783	3.58842	0.0330368	0.388843
RBPMS2	42.1171	14.4687	1.54147	0.0330368	0.388843
TTC38	434.199	20.5825	4.39887	0.0330368	0.388843
HTT	781.241	8.26437	6.56272	0.0330368	0.388843
SMOC2	390.008	35.1893	3.47029	0.0330368	0.388843
EIF1AY	3.41289	6.51416	-0.932584	0.0332646	0.389528
NXPH3	23.2346	1.21575	4.25636	0.0333422	0.389528
PRKG1	102.307	2.21457	5.52974	0.0333422	0.389528
PARP6	61.6421	9.28886	2.73034	0.0333422	0.389528
IQCG	49.5594	1.93536	4.67849	0.0333422	0.389528
TRIL	66.7713	2.2433	4.89553	0.0333422	0.389528
TCF4	322.007	3.97789	6.33894	0.0333422	0.389528
PIP5K1C	809.606	17.6101	5.52275	0.0333422	0.389528
SEL1L3	1503.35	42.9712	5.12867	0.0333422	0.389528
TPPP	31.3946	4.84899	2.69476	0.0333422	0.389528
DHRS2	15.4247	5.6624	1.44575	0.0336499	0.390519
JPH2	73.8798	5.3281	3.79349	0.03365	0.390519
PPAP2B	562.886	20.7805	4.75954	0.0336501	0.390519
CDHR5	361.389	34.4284	3.39188	0.0336501	0.390519
TRMT112	376.243	106.003	1.82757	0.0336501	0.390519
TMEM204	137.726	10.5122	3.71167	0.0336501	0.390519
FKBP1A	1367.38	127.285	3.42528	0.0336501	0.390519
ZBTB12	37.6401	3.83633	3.29447	0.0336501	0.390519
CPSF4	89.1481	10.1812	3.13029	0.0336501	0.390519
RNF180	21.1293	0.915775	4.52811	0.0338048	0.391239
SNORD88C	0.608029	1.15103	-0.920721	0.0339344	0.391239
GUCY1A2	25.1919	0.56756	5.47204	0.0339602	0.391239
AX747844	11.8148	2.00127	2.56161	0.0339603	0.391239
CERKL	55.9012	2.18146	4.67951	0.0339603	0.391239
C1S	3357.89	82.3275	5.35004	0.0339603	0.391239
FLVCR2	83.9833	2.32624	5.17403	0.0339603	0.391239
TMEM30B	2002.4	20.4826	6.61118	0.0339603	0.391239
ARRDC3	883.556	16.1106	5.77724	0.0339603	0.391239
PARP8	164.162	4.14052	5.30916	0.0339603	0.391239
BC040577	22.2154	1.29422	4.10141	0.0342729	0.391691
MYO1A	58.9225	14.0858	2.06458	0.034273	0.391691
DACT1	264.39	4.74258	5.80085	0.034273	0.391691
SLC2A4	10.1773	3.54554	1.52128	0.034273	0.391691
CAPN5	1711.05	31.6942	5.75452	0.034273	0.391691
CHRDL2	130.649	20.3071	2.68563	0.034273	0.391691
UEVLD	129.936	6.54256	4.31181	0.034273	0.391691
PCGF1	97.8496	10.6003	3.20646	0.034273	0.391691
SBF1	718.405	19.1545	5.22904	0.034273	0.391691
TIPARP	579.145	8.58736	6.07557	0.034273	0.391691
NR3C2	50.0391	3.10816	4.00892	0.034273	0.391691
MDGA1	31.0486	0.647651	5.58317	0.0344302	0.392165
PTCH2	9.14888	1.36464	2.74508	0.034588	0.392165
PTGER3	75.9575	1.1033	6.1053	0.0345881	0.392165
PRKAR2B	37.9055	4.75294	2.99551	0.0345881	0.392165
LOC643733	16.0663	1.32342	3.6017	0.0345881	0.392165
GDPGP1	37.3221	3.39999	3.45643	0.0345881	0.392165
ERN1	178.81	4.26781	5.38879	0.0345881	0.392165
PTPRG	373.776	4.83499	6.27252	0.0345881	0.392165
NTN1	110.921	7.60304	3.86682	0.0345881	0.392165
ATP8B1	1033.73	27.3204	5.24174	0.0345881	0.392165
LOC100127983	12.0839	3.71336	1.70229	0.0345881	0.392165
C19orf69	1.49042	1.15577	0.366869	0.0348725	0.392378
NRK	30.3196	0.466453	6.02237	0.0349053	0.392378
HS3ST2	6.62484	1.38974	2.25306	0.0349056	0.392378
PDSS2	178.148	4.45155	5.32262	0.0349057	0.392378
AUH	67.2495	6.44683	3.38286	0.0349057	0.392378
SNORD81	3.68367	6.54808	-0.829928	0.0349057	0.392378
CSNK2A1	464.142	31.283	3.89112	0.0349057	0.392378
POLR3F	38.4818	4.86292	2.98428	0.0349057	0.392378
CYFIP2	144.411	6.19131	4.54379	0.0349057	0.392378
NAT1	65.2865	3.56876	4.19329	0.0349057	0.392378
SIT1	33.0034	3.928	3.07075	0.0349057	0.392378
AF070581	42.6076	0.844813	5.65633	0.0349057	0.392378
AOX1	63.5939	1.71164	5.21544	0.0352258	0.39373
C10orf35	32.6456	3.89965	3.06547	0.0352258	0.39373
WDR7	193.252	3.36157	5.8452	0.0352258	0.39373
BC038464	101.207	5.9423	4.09014	0.0352258	0.39373
PRPF6	585.495	40.4893	3.85404	0.0352258	0.39373
SH3BP5	176.766	9.16455	4.26964	0.0352258	0.39373
PPM1K	43.227	2.5592	4.07817	0.0352258	0.39373
DEPTOR	605.406	15.9633	5.24507	0.0352258	0.39373
BEND6	19.2202	0.374226	5.68257	0.0355483	0.396212
SNX29	221.719	3.92104	5.82135	0.0355485	0.396212
GNA11	361.589	44.9751	3.00715	0.0355485	0.396212
TBXA2R	31.6289	1.82768	4.11316	0.0355485	0.396212
GPR18	4.67855	0.828655	2.49722	0.0358733	0.396471
AX747067	12.6163	0.913035	3.78848	0.0358735	0.396471
AK056558	10.8738	0.795661	3.77256	0.0358735	0.396471
DCLK2	32.8279	1.47063	4.48041	0.0358735	0.396471
CMIP	1191.9	32.9199	5.17816	0.0358735	0.396471
RGMA	67.9386	16.711	2.02344	0.0358736	0.396471
FPR3	375.669	10.9232	5.10399	0.0358736	0.396471
SNED1	170.222	2.18513	6.28356	0.0358736	0.396471
NAA20	223.719	36.4103	2.61927	0.0358736	0.396471
ANXA6	1158.42	41.7062	4.79575	0.0358736	0.396471
PTK2B	402.164	9.76563	5.36393	0.0358736	0.396471
S1PR3	256.114	10.0947	4.66511	0.0358736	0.396471
ADIPOQ	231.883	1.2937	7.48576	0.0360015	0.397306
NIPAL4	4.82249	0.843809	2.51479	0.0360366	0.397306
ZNF221	11.6338	0.670522	4.11689	0.0362012	0.397306
OMD	45.0813	3.41082	3.72434	0.0362012	0.397306
ACVRL1	219.133	7.0245	4.96327	0.0362012	0.397306
DIO2	106.135	7.1257	3.89672	0.0362012	0.397306
ATP6V0D1	983.662	49.3873	4.31595	0.0362012	0.397306
CECR1	427.51	13.3149	5.00484	0.0362012	0.397306
KLF4	750.04	35.1738	4.4144	0.0362012	0.397306
SNORD36A	4.64326	7.18246	-0.629339	0.0362012	0.397306
SCNN1D	45.031	0.558526	6.33315	0.0363658	0.398157
SNORA47	9.7309	2.31384	2.07228	0.0365163	0.398157
TRBV5-1	8.85986	1.71643	2.36787	0.0365313	0.398157
DIXDC1	97.0384	5.16971	4.2304	0.0365314	0.398157
C2orf15	18.0936	3.03702	2.57475	0.0365314	0.398157
MARCH1	70.3791	2.22803	4.98131	0.0365314	0.398157
PLXDC2	458.7	11.7421	5.28779	0.0365314	0.398157
ATP10B	1002.94	9.02016	6.79686	0.0365314	0.398157
KIF13A	299.976	7.19004	5.3827	0.0365314	0.398157
PLEC	16649.5	77.7411	7.74259	0.0365314	0.398157
RNLS	12.5324	0.570657	4.45689	0.0366974	0.398204
S1PR5	10.5243	0.597706	4.13814	0.0366974	0.398204
COL4A3BP	202.604	7.01536	4.852	0.0366975	0.398204
ARHGAP28	62.0646	0.545951	6.82886	0.0368641	0.398204
ZNF625	5.67951	0.975437	2.54165	0.0368642	0.398204
EMP1	1387.66	80.2599	4.11183	0.0368642	0.398204
ALDH1A3	341.514	11.1761	4.93345	0.0368642	0.398204
CARHSP1	326.394	19.1865	4.08845	0.0368642	0.398204
TET2	249.424	2.17211	6.84336	0.0368642	0.398204
OSMR	2238.03	13.8956	7.33146	0.0368642	0.398204
POLK	99.2999	2.84556	5.12501	0.0368642	0.398204
DQ595103	32.7718	4.602	2.83212	0.0368642	0.398204
BCAP31	1029.79	75.1319	3.77678	0.0368642	0.398204
AX748210	11.2998	0.889856	3.66658	0.0370315	0.399191
ZNF132	7.39468	0.864867	3.09594	0.0370315	0.399191
AK124173	12.9822	0.498882	4.7017	0.0370315	0.399191
DMKN	168.704	6.93368	4.60473	0.0371995	0.399363
ACBD6	135.317	15.7782	3.10034	0.0371995	0.399363
ME2	370.34	14.7013	4.65483	0.0371995	0.399363
HLA-DQB1	632.575	80.1738	2.98003	0.0371995	0.399363
ERLIN2	604.987	9.97005	5.92316	0.0371995	0.399363
FGFR1	673.826	9.41562	6.16118	0.0371995	0.399363
SUSD5	22.9746	0.517298	5.4729	0.0375372	0.400535
PI15	91.1145	1.33007	6.0981	0.0375374	0.400535
FERMT2	400.906	22.5856	4.14979	0.0375374	0.400535
EML1	82.2022	5.92531	3.79421	0.0375375	0.400535
ZCCHC3	121.503	11.6666	3.38054	0.0375375	0.400535
CNOT6L	266.382	6.06036	5.45795	0.0375375	0.400535
NDRG1	4515.26	44.627	6.66075	0.0375375	0.400535
PTGR1	189.094	11.6068	4.02606	0.0375375	0.400535
PTPLAD2	40.3189	3.41065	3.56334	0.0375375	0.400535
PGR	16.5839	0.344449	5.58935	0.0378777	0.400776
DMBT1	4277.15	77.227	5.7914	0.037878	0.400776
TIAM1	44.5052	1.36811	5.02372	0.037878	0.400776
VPS13D	532.5	4.67424	6.83191	0.037878	0.400776
MAP6	20.1408	1.19465	4.07547	0.037878	0.400776
PHLDB1	669.116	9.38137	6.15631	0.037878	0.400776
KIAA0513	171.139	3.68605	5.53695	0.037878	0.400776
ARHGAP44	169.553	3.20825	5.72381	0.037878	0.400776
PITPNM3	92.1725	2.51244	5.19717	0.037878	0.400776
GPBAR1	14.4071	3.4028	2.08199	0.037878	0.400776
FSTL1	4716.5	66.3482	6.15151	0.037878	0.400776
LOC285141	0.618293	1.11947	-0.856456	0.03822	0.400776
PNMAL1	18.1286	1.12106	4.01533	0.0382211	0.400776
SLC7A9	67.537	2.89398	4.54455	0.0382211	0.400776
DLG4	125.305	3.00392	5.38246	0.0382211	0.400776
SNORD34	1.52776	2.42034	-0.663796	0.0382212	0.400776
FBXL2	30.5226	1.03069	4.8882	0.0382212	0.400776
PCDH7	981.836	7.01679	7.12853	0.0382212	0.400776
GLI3	128.891	1.84554	6.12596	0.0382212	0.400776
LOC100129845	166.887	3.41371	5.61139	0.0382212	0.400776
AX747379	21.1436	1.40927	3.9072	0.0382212	0.400776
STX12	458.054	18.0918	4.66211	0.0382212	0.400776
DENND4A	195.569	4.13891	5.56228	0.0382212	0.400776
LDOC1L	374.816	10.8383	5.11198	0.0382212	0.400776
C3orf26	92.092	4.74374	4.27898	0.0382212	0.400776
PLAC8	1510.87	30.1363	5.64774	0.0382212	0.400776
HCG11	51.5073	2.47615	4.3786	0.0383937	0.402317
MFSD6L	63.8624	1.37721	5.53515	0.0385668	0.403061
CCDC115	163.778	16.3716	3.32247	0.038567	0.403061
ARHGAP24	81.4952	2.64858	4.94342	0.038567	0.403061
VEGFC	101.839	4.54272	4.48659	0.038567	0.403061
PABPC4L	17.1953	0.417381	5.36451	0.0387408	0.404024
THEMIS	15.0509	0.89568	4.07072	0.0389154	0.404024
GLI1	40.8647	1.72776	4.56388	0.0389154	0.404024
GCNT4	6.43696	1.83949	1.80708	0.0389154	0.404024
ITGAM	164.898	2.71662	5.92361	0.0389155	0.404024
LAIR1	366.398	8.63405	5.40723	0.0389155	0.404024
ZNF331	127.648	2.87248	5.47373	0.0389155	0.404024
ZDHHC4	227.686	22.9731	3.30903	0.0389155	0.404024
TNFRSF10A	241.191	7.50607	5.00598	0.0389155	0.404024
MXRA5	8456.98	30.0082	8.13864	0.0389155	0.404024
APOB	15.2074	7.83667	0.956461	0.0392603	0.405236
TPSD1	80.3792	3.73722	4.42679	0.0392658	0.405236
ALKBH2	72.5516	8.74508	3.05246	0.0392666	0.405236
MAMLD1	40.7698	1.45922	4.80423	0.0392666	0.405236
PLCB3	736.345	19.8746	5.21138	0.0392666	0.405236
LRMP	14.468	2.81965	2.35928	0.0392666	0.405236
RASL12	68.0396	5.64625	3.59101	0.0392666	0.405236
PSMF1	1036.08	41.7173	4.63435	0.0392666	0.405236
CFI	541.934	11.4543	5.56415	0.0392666	0.405236
KRT1	6.66461	0.882864	2.91626	0.0392893	0.405236
LOC645431	26.8838	1.26866	4.40536	0.0394431	0.406555
IFFO1	52.2024	1.74126	4.90592	0.0396204	0.407052
NOVA1	6.59499	1.06283	2.63346	0.0396204	0.407052
FUT11	199.865	5.10276	5.29161	0.0396204	0.407052
TJAP1	156.982	6.01301	4.70637	0.0396204	0.407052
LHX6	18.3647	1.19359	3.94355	0.0396204	0.407052
RECQL5	99.5057	4.06712	4.6127	0.0399769	0.408297
TBC1D22A	255.659	8.29444	4.94593	0.0399769	0.408297
SYT11	142.086	5.53491	4.68206	0.039977	0.408297
DLST	645.591	24.0091	4.74896	0.039977	0.408297
GNG2	131.168	4.87506	4.74985	0.039977	0.408297
KCNK6	269.805	10.7601	4.64816	0.039977	0.408297
PDZD4	11.9562	1.43146	3.0622	0.0401561	0.408297
ARHGEF37	84.5404	3.79634	4.47696	0.0401562	0.408297
SNORD50B	0.93815	1.71683	-0.871859	0.0401562	0.408297
C8orf49	8.49925	1.14907	2.88687	0.0402958	0.408297
CCDC77	32.2911	2.56714	3.6529	0.0403361	0.408297
MIR4743	2.54908	1.40296	0.861507	0.0403361	0.408297
COL4A4	10.1716	1.09573	3.21458	0.0403361	0.408297
CAND2	14.9726	1.51434	3.30556	0.0403362	0.408297
EHHADH	170.013	4.68621	5.18108	0.0403362	0.408297
RNF150	17.6289	2.01185	3.13135	0.0403362	0.408297
RHOBTB1	187.533	3.63765	5.688	0.0403362	0.408297
PRKD1	69.2701	1.44725	5.58085	0.0403362	0.408297
EHD2	2400.23	51.8721	5.53207	0.0403362	0.408297
COL8A1	1094.09	14.7648	6.21142	0.0403362	0.408297
CS644968	5.82555	4.30769	0.435479	0.0403362	0.408297
STK10	384.969	8.18125	5.55628	0.0403362	0.408297
MIR4737	2.82597	1.56497	0.85261	0.0405167	0.408297
CRP	4.68074	1.49542	1.64618	0.0406196	0.408297
PCDHB5	13.9886	1.35074	3.37243	0.040698	0.408297
KLF12	77.3327	1.74726	5.46791	0.0406981	0.408297
HSD17B6	40.4664	1.53223	4.72302	0.0406981	0.408297
CNTNAP1	134.466	4.22026	4.99377	0.0406981	0.408297
ST6GALNAC1	1150.02	22.6846	5.6638	0.0406981	0.408297
FOXF1	98.9954	18.2898	2.43632	0.0406982	0.408297
NLGN2	311.83	5.57556	5.8055	0.0406982	0.408297
DKFZp434J194	369.388	38.8727	3.24831	0.0406982	0.408297
PTGS1	207.595	6.33191	5.03499	0.0406982	0.408297
JA429831	19.6905	57.6191	-1.54905	0.0406982	0.408297
ZBTB33	145.525	8.2679	4.1376	0.0406982	0.408297
NPSR1	117.512	3.66265	5.00378	0.0407364	0.408297
ZNF555	18.7996	0.597491	4.97564	0.0410628	0.408297
NALCN	30.0668	0.292954	6.68135	0.0410628	0.408297
AK093746	7.75699	1.20352	2.68824	0.0410628	0.408297
KCNK12	9.14381	0.687974	3.73237	0.0410628	0.408297
CD163L1	39.6835	1.34609	4.88169	0.0410629	0.408297
CORO2B	18.8681	0.642241	4.87669	0.0410629	0.408297
RASSF1	130.255	7.91434	4.04073	0.0410629	0.408297
ARSB	207.308	3.52772	5.87689	0.0410629	0.408297
TSPAN1	1606.1	105.973	3.9218	0.0410629	0.408297
SELPLG	290.966	10.0518	4.85533	0.0410629	0.408297
NDN	167.3	11.0985	3.91401	0.0410629	0.408297
MRC2	2249.05	17.3986	7.0142	0.0410629	0.408297
TNFSF12-TNFSF13	755.915	24.1257	4.96958	0.0410629	0.408297
ZNF542	29.3189	2.06992	3.82418	0.0410629	0.408297
BC069815	42.7087	12.5977	1.76137	0.0410629	0.408297
BC062758	20.1044	2.76119	2.86415	0.0413126	0.409883
BC011648	8.69174	0.776239	3.48507	0.0414244	0.409883
WSCD2	9.89157	1.19866	3.04477	0.0414301	0.409883
ARHGEF19	65.0619	4.5058	3.85196	0.0414304	0.409883
BC127952	36.3466	11.0386	1.71926	0.0414304	0.409883
LRRC25	156.54	4.0137	5.28545	0.0414304	0.409883
MMAA	62.7844	2.1882	4.84259	0.0414304	0.409883
SHROOM3	2817.92	16.5534	7.41136	0.0414304	0.409883
JA202335	2.29944	0.920849	1.32025	0.0416685	0.411479
HAND2	55.8857	11.7138	2.25426	0.0418005	0.411479
SELE	439.464	2.09409	7.71328	0.0418006	0.411479
CTU1	62.8245	6.36702	3.30264	0.0418006	0.411479
KIRREL	314.442	6.20339	5.66359	0.0418007	0.411479
SH3RF3	122.132	2.88776	5.40235	0.0418007	0.411479
KIAA1671	666.084	8.29678	6.32701	0.0418007	0.411479
PALLD	1912.79	42.9783	5.47592	0.0418007	0.411479
TRA	2.92216	0.930074	1.65162	0.0421725	0.412831
LOC90925	2.35096	1.279	0.878235	0.0421735	0.412831
ZFHX4	103.02	0.91367	6.81704	0.0421736	0.412831
NRIP2	12.6674	1.82818	2.79263	0.0421736	0.412831
TRAF3	239.014	4.23494	5.81861	0.0421737	0.412831
PANK3	246.346	9.23045	4.73814	0.0421737	0.412831
MYL6B	73.5635	7.21445	3.35003	0.0421737	0.412831
LOC100286938	3.33229	0.952383	1.8069	0.0421737	0.412831
XPNPEP2	24.7249	6.15913	2.00517	0.0421737	0.412831
CABIN1	1206.75	18.3603	6.03839	0.0425496	0.414046
CD52	122.961	32.0081	1.94169	0.0425496	0.414046
TRIM22	533.728	17.0534	4.96797	0.0425496	0.414046
CD27	67.2426	12.9305	2.3786	0.0425496	0.414046
MT1G	366.386	109.035	1.74857	0.0425496	0.414046
MST1R	1316.92	13.9932	6.55629	0.0425496	0.414046
CPE	203.454	19.226	3.40357	0.0425496	0.414046
AK057719	72.367	4.19195	4.10964	0.0425496	0.414046
AKR1B15	5.33365	1.95357	1.44901	0.0428075	0.414046
PGBD2	30.8635	2.35617	3.71139	0.0429283	0.414046
SWAP70	312.614	8.67049	5.17212	0.0429283	0.414046
ZAP70	33.2077	2.04632	4.02041	0.0429283	0.414046
DCP2	249.661	2.88583	6.43484	0.0429283	0.414046
FAM63A	165.392	7.48342	4.46605	0.0429283	0.414046
HIPK3	660.833	14.6433	5.49597	0.0429283	0.414046
TBC1D10C	39.9958	4.8281	3.05032	0.0429283	0.414046
SNRPN	174.225	7.88413	4.46585	0.0429283	0.414046
GMFG	67.282	10.0928	2.7369	0.0429283	0.414046
RNF25	126.842	9.4498	3.7466	0.0429283	0.414046
SF3B14	421.624	84.0558	2.32654	0.0429283	0.414046
MIR143HG	30.5047	3.29488	3.21074	0.0429283	0.414046
BTN3A3	343.884	11.1209	4.95057	0.0429283	0.414046
LAMA4	992.904	15.4567	6.00535	0.0429283	0.414046
GIMAP7	50.4466	11.2533	2.16441	0.0429283	0.414046
TCL1A	14.5991	2.74244	2.41235	0.0431018	0.414177
TMEM130	12.9649	1.0783	3.58778	0.0431187	0.414177
FAM167B	25.1274	4.76244	2.39949	0.0433099	0.414177
ILK	1334.28	73.5431	4.18133	0.0433099	0.414177
C14orf21	108.602	7.18354	3.91821	0.0433099	0.414177
DUSP3	685.087	26.5019	4.69212	0.0433099	0.414177
C19orf77	244.685	104.376	1.22913	0.0433099	0.414177
ITGB2	1272.58	27.1441	5.55098	0.0433099	0.414177
F2RL1	963.502	27.7618	5.11711	0.0433099	0.414177
HARS	588.816	12.5671	5.5501	0.0433099	0.414177
CREB3L2	963.598	14.029	6.10195	0.0433099	0.414177
INMT	47.5891	5.01297	3.24689	0.0433099	0.414177
PEX2	269.763	8.55391	4.97896	0.0433099	0.414177
TTC39B	106.568	2.66528	5.32135	0.0433099	0.414177
PYHIN1	12.0698	1.32362	3.18884	0.0435016	0.415584
CLEC2D	24.2496	1.68812	3.84448	0.0436942	0.415584
SMYD3	59.3508	4.39439	3.75553	0.0436943	0.415584
TRIT1	71.4288	5.12417	3.80111	0.0436943	0.415584
STAMBP	263.74	7.20885	5.1932	0.0436943	0.415584
LIMD1	288.605	7.96089	5.18002	0.0436943	0.415584
SGMS2	610.749	8.20605	6.21775	0.0436943	0.415584
DECR1	400.644	29.1292	3.78178	0.0436943	0.415584
VSIG4	431.053	8.62543	5.64313	0.0436943	0.415584
KCNJ3	3.14802	1.55148	1.0208	0.0438514	0.416197
TCEANC2	43.9554	1.80691	4.60444	0.0440815	0.416197
RGS1	708.774	35.5524	4.31731	0.0440816	0.416197
AHNAK2	1894.13	9.96063	7.57108	0.0440816	0.416197
BDKRB2	116.907	3.17911	5.20059	0.0440816	0.416197
ENTPD5	91.3935	5.67504	4.00939	0.0440816	0.416197
TMC8	94.9421	4.3262	4.45588	0.0440816	0.416197
TCN2	268.493	13.8263	4.2794	0.0440816	0.416197
TMEM150C	17.667	2.23328	2.98383	0.0440816	0.416197
SEPT8	899.425	11.6768	6.26729	0.0440816	0.416197
ACTN2	2.34828	1.01819	1.2056	0.0442624	0.416197
PDZRN4	8.85993	1.54938	2.5156	0.0444713	0.416197
DRD4	23.2369	0.809281	4.84363	0.0444717	0.416197
LRRN4CL	25.6718	2.3803	3.43097	0.0444717	0.416197
GPR171	17.536	2.06928	3.08312	0.0444717	0.416197
C1orf35	67.2404	10.6505	2.6584	0.0444718	0.416197
FAM45A	47.6758	3.79532	3.65096	0.0444718	0.416197
ARHGEF25	87.6628	6.06588	3.85318	0.0444718	0.416197
C3AR1	254.126	8.69451	4.8693	0.0444718	0.416197
FICD	51.6769	2.97032	4.12083	0.0444718	0.416197
GPX2	1346.05	339.543	1.98707	0.0444718	0.416197
SPG11	494.572	9.27618	5.7365	0.0444718	0.416197
FYCO1	398.341	10.2885	5.27489	0.0444718	0.416197
DPYSL3	1992.57	41.493	5.58562	0.0444718	0.416197
ISOC1	459.942	16.1524	4.83163	0.0444718	0.416197
IMPAD1	1327.23	20.0073	6.05175	0.0444718	0.416197
TSR2	160.135	21.2161	2.91606	0.0444718	0.416197
PYGM	7.16036	1.98646	1.84983	0.0446679	0.417151
LIPC	27.1931	1.27528	4.41436	0.0448646	0.417151
KCNK13	11.5322	0.471402	4.61256	0.0448647	0.417151
CHST5	19.6178	6.66782	1.55688	0.0448648	0.417151
PRDM8	29.3913	1.55486	4.24053	0.0448649	0.417151
RGL1	130.775	4.47765	4.8682	0.0448649	0.417151
BC073817	154.901	3.43331	5.49561	0.0448649	0.417151
SNX33	551.181	12.9286	5.41389	0.0448649	0.417151
PTPRM	187.932	6.89228	4.76909	0.0448649	0.417151
AK309441	459.622	18.5114	4.63396	0.0448649	0.417151
AOAH	91.5268	4.0572	4.49564	0.0448649	0.417151
SRP19	391.659	9.46047	5.37154	0.0450625	0.418495
USP39	349.188	18.5456	4.23485	0.0450625	0.418495
POLR3H	814.634	17.6528	5.52818	0.0452609	0.418611
CCDC125	70.6727	1.85217	5.25386	0.0452609	0.418611
RGAG4	29.0224	1.64452	4.14143	0.0452609	0.418611
HEXIM2	18.148	3.6115	2.32914	0.0452609	0.418611
KDM6B	930.262	11.6809	6.31541	0.0452609	0.418611
SUCLG2	474.147	29.6758	3.99797	0.0452609	0.418611
DDHD2	223.729	5.22904	5.41906	0.0452609	0.418611
TXNIP	2650.44	186.334	3.83027	0.0456599	0.420082
REL	73.892	4.19508	4.13865	0.0456599	0.420082
TRIM5	203.934	5.66503	5.16987	0.0456599	0.420082
CDK2AP1	1077.5	75.4567	3.83589	0.0456599	0.420082
METTL7A	215.498	23.269	3.21119	0.0456599	0.420082
NIN	254.551	3.54336	6.16669	0.0456599	0.420082
PCBP1	3090.05	204.173	3.91977	0.0456599	0.420082
KLF3	1278.45	24.6684	5.69559	0.0456599	0.420082
DQ579268	19.5253	23.8018	-0.28572	0.0456599	0.420082
TCF21	49.9543	2.51255	4.31338	0.0458604	0.420101
IGVK-A2	100.242	16.0456	2.64325	0.0460615	0.420101
ZNF583	15.29	0.857201	4.15681	0.0460617	0.420101
HMCN2	3.21523	1.1905	1.43335	0.0460617	0.420101
PTGFR	18.4523	0.889992	4.37386	0.0460618	0.420101
NR2F1	68.5417	9.66136	2.82668	0.0460618	0.420101
NEXN	156.807	16.4509	3.25275	0.0460618	0.420101
PDLIM1	2297.32	185.725	3.62871	0.0460618	0.420101
ITGA7	102.718	8.89252	3.52995	0.0460618	0.420101
SPPL3	476.67	15.0366	4.98644	0.0460618	0.420101
PSTPIP1	30.8593	1.72445	4.16149	0.0460618	0.420101
SIGLEC7	49.5431	1.98873	4.63876	0.0460618	0.420101
CYS1	55.9356	3.71924	3.91069	0.0460618	0.420101
TRAPPC10	504.551	8.0581	5.96841	0.0460618	0.420101
GM2A	1195.42	24.6822	5.5979	0.0460618	0.420101
EDNRA	219.835	6.39275	5.10384	0.0462639	0.4217
BTF3L4	183.839	8.10454	4.50357	0.0464667	0.422084
RBP5	9.51665	3.42395	1.47479	0.0464667	0.422084
VLDLR	131.261	3.05381	5.42569	0.0464667	0.422084
IGHE	16398.7	130.72	6.97096	0.0464667	0.422084
MZT2A	175.703	45.6831	1.9434	0.0464667	0.422084
MSC	259.96	6.69866	5.27827	0.0464667	0.422084
SEMG2	5.94576	0.95013	2.64566	0.04652	0.422325
BTNL3	5.48585	2.7866	0.977211	0.0468713	0.422381
AK091265	22.7207	3.21219	2.82238	0.0468739	0.422381
RET	7.8393	1.11682	2.81133	0.0468746	0.422381
LRRC8C	128.135	3.20867	5.31954	0.0468746	0.422381
NAPSB	25.6455	5.94492	2.10898	0.0468746	0.422381
GTDC1	118.201	2.85349	5.37237	0.0468746	0.422381
RNF217	36.1127	1.61702	4.4811	0.0468746	0.422381
LOC100129046	30.155	2.67604	3.49422	0.0468746	0.422381
WBP1L	510.039	12.1689	5.38933	0.0468746	0.422381
LRRC33	59.1071	3.06529	4.26924	0.0468746	0.422381
SLC33A1	530.172	7.74536	6.09698	0.0468746	0.422381
ARL15	93.3321	5.00023	4.22231	0.0468746	0.422381
FAM133B	14.5976	2.76621	2.39975	0.0468746	0.422381
CTSE	3453.23	288.337	3.58211	0.0472855	0.423661
GMPR2	290.934	11.1604	4.70423	0.0472855	0.423661
LOC100134229	117.749	3.22077	5.19217	0.0472855	0.423661
PRKAG2	88.7908	3.12621	4.82793	0.0472855	0.423661
DPYD	1045.72	5.11229	7.67631	0.0472855	0.423661
MTMR6	232.178	7.22269	5.00655	0.0472855	0.423661
PACSIN2	758.308	26.0429	4.86382	0.0472855	0.423661
ZBTB47	189.418	5.54721	5.09367	0.0472855	0.423661
CORO2A	635.694	9.78343	6.02185	0.0472855	0.423661
TLN1	5107.7	73.9731	6.10953	0.0472855	0.423661
CHGA	28.5706	35.8936	-0.329196	0.0474887	0.424546
GSC	9.91261	0.742442	3.73891	0.0474906	0.424546
DPY19L2P2	24.6963	0.342144	6.17354	0.0474919	0.424546
TOX	29.9456	4.09027	2.87208	0.047492	0.424546
SULT1E1	56.3973	4.43971	3.66709	0.0476929	0.424954
XKR9	83.0974	1.49571	5.7959	0.0476992	0.424954
EBF3	29.4608	0.621625	5.56661	0.0476994	0.424954
KLF13	1016.74	23.127	5.45823	0.0476995	0.424954
INO80B	261.242	19.0081	3.7807	0.0476995	0.424954
CST7	86.9344	16.6176	2.38721	0.0476995	0.424954
ASB4	0.0122857	1.19751	-6.60692	0.0479181	0.425781
CHRNA7	9.35347	0.740036	3.65983	0.0481164	0.425781
FAM26E	75.6688	1.85173	5.35275	0.0481164	0.425781
ZFX	260.322	5.32085	5.6125	0.0481164	0.425781
FIBIN	123.78	3.67842	5.07254	0.0481165	0.425781
AMFR	785.763	27.14	4.8556	0.0481165	0.425781
LGALS9	1719.75	94.251	4.18955	0.0481165	0.425781
NSFL1C	446.845	22.8327	4.2906	0.0481165	0.425781
SLMAP	659.777	16.3114	5.33803	0.0481165	0.425781
C4orf29	48.0254	3.37478	3.83093	0.0481165	0.425781
DAB2	569.942	15.6269	5.18871	0.0481165	0.425781
NCALD	223.232	3.5274	5.98379	0.0481165	0.425781
CALCA	0.00847857	5.89449	-9.44133	0.0485359	0.428535
GPR133	49.9243	2.01767	4.62898	0.0485364	0.428535
GIT1	505.401	26.7256	4.24113	0.0485365	0.428535
EDIL3	180.452	5.66565	4.99323	0.0485365	0.428535
PDE3B	36.7497	1.29576	4.82586	0.0487476	0.429536
PRKCH	121.999	5.37122	4.50548	0.0489596	0.429536
FCGR2A	1145.36	19.3583	5.8867	0.0489596	0.429536
COL6A2	10501.3	106.576	6.62254	0.0489596	0.429536
AP1B1	1742.96	28.0505	5.95737	0.0489596	0.429536
MFI2	285.32	9.97528	4.83808	0.0489596	0.429536
SEPT11	1046.68	15.2773	6.09829	0.0489596	0.429536
GDF9	93.7198	4.87432	4.26508	0.0489596	0.429536
C6	17.4879	0.670241	4.70553	0.0491688	0.429536
ELOVL2	15.5194	0.413142	5.2313	0.0493855	0.429536
PCSK1	10.8923	1.98681	2.45479	0.0493856	0.429536
MAP2	17.155	0.95687	4.16417	0.0493856	0.429536
CREB3L4	70.0495	6.07051	3.52848	0.0493858	0.429536
TIRAP	100.529	6.37527	3.97899	0.0493858	0.429536
CD300A	149.628	4.00644	5.22292	0.0493858	0.429536
PHC3	613.643	4.44699	7.10843	0.0493858	0.429536
SH3BGRL	989.775	62.3501	3.98864	0.0493858	0.429536
FCN3	16.3298	0.96869	4.07533	0.0493858	0.429536
HSPB2	35.931	3.57206	3.3304	0.0493858	0.429536
SOCS2	44.9193	3.8159	3.55724	0.0493858	0.429536
TRABD	609.211	29.7945	4.35382	0.0493858	0.429536
FLJ13197	76.9569	2.09086	5.20188	0.0493858	0.429536
KCNMB1	49.7561	15.5665	1.67642	0.0493858	0.429536
MLLT4	594.575	11.4542	5.69791	0.0493858	0.429536
VNN1	81.5006	9.94125	3.03531	0.0493858	0.429536
NIPAL2	116.582	6.68284	4.12475	0.0493858	0.429536
PPP2CB	904.502	43.7228	4.37067	0.0493858	0.429536
OSTalpha	5.76333	1.15866	2.31444	0.0498149	0.43042
RNF183	63.4368	1.044	5.92512	0.049815	0.43042
TMEM154	45.5923	4.36555	3.38456	0.049815	0.43042
SEL1L	1185.32	16.1988	6.19324	0.0498151	0.43042
KCNK3	21.6782	2.13899	3.34125	0.0498151	0.43042
VPREB3	15.8366	9.81402	0.690347	0.0498151	0.43042
GXYLT2	184.6	4.58766	5.3305	0.0498151	0.43042
TLE2	115.398	7.81787	3.8837	0.0498151	0.43042
HYAL1	54.1724	4.61135	3.5543	0.0498151	0.43042
DAPP1	33.5547	3.01095	3.47823	0.0498151	0.43042
DCTN6	277.658	26.1424	3.40884	0.0498151	0.43042
PNPLA4	82.2959	5.01973	4.03514	0.0498151	0.43042
CARD9	34.1751	2.48018	3.78443	0.0502474	0.431319
TMTC2	251.081	4.24215	5.88721	0.0502475	0.431319
SEPT6	253.959	9.21294	4.78479	0.0502475	0.431319
PIK3C2B	860.805	10.1834	6.4014	0.0502475	0.431319
DNAJA4	362.54	9.68107	5.22683	0.0502475	0.431319
GREM1	2209.96	97.4441	4.5033	0.0502475	0.431319
C17orf28	1617.12	38.0493	5.40942	0.0502475	0.431319
ZBTB7C	81.2998	4.79403	4.08394	0.0502475	0.431319
TMEM237	102.928	2.96577	5.11709	0.0502475	0.431319
SMTN	731.695	28.5402	4.68018	0.0502475	0.431319
TTC37	225.266	10.305	4.45022	0.0502475	0.431319
TCRBV3S1	211.302	26.0754	3.01854	0.0502475	0.431319
MIR25	0.599614	1.11379	-0.893376	0.0506763	0.431999
MAB21L2	24.1012	0.842765	4.83783	0.0506824	0.431999
HERC1	293.073	3.75157	6.28762	0.0506829	0.431999
PRUNE2	55.6882	9.49718	2.5518	0.050683	0.431999
OSTBETA	9.1063	2.65783	1.77662	0.0506831	0.431999
C8orf42	9.84308	0.862451	3.5126	0.0506831	0.431999
SGK196	85.7667	6.06179	3.8226	0.0506831	0.431999
CTSS	2015.33	50.3696	5.32232	0.0506831	0.431999
ANAPC7	217.217	11.2576	4.27017	0.0506831	0.431999
COL4A2	9172.33	110.254	6.37839	0.0506831	0.431999
RAE1	180.938	17.6182	3.36036	0.0506831	0.431999
C7orf13	5.41216	2.45842	1.13847	0.0506831	0.431999
PCOLCE	1224.62	37.5598	5.027	0.0506831	0.431999
HAVCR1	167.615	0.88566	7.56418	0.0507953	0.432721
MAN1A1	475.867	19.141	4.63582	0.050902	0.432929
RDH12	1.71419	1.58469	0.113329	0.0511217	0.432929
EPOR	43.6126	1.56205	4.80323	0.0511218	0.432929
MITF	127.112	2.99378	5.40799	0.0511218	0.432929
C11orf35	20.5854	2.20941	3.21989	0.0511218	0.432929
MCAM	1016.83	55.3309	4.19985	0.0511218	0.432929
UHRF1BP1L	215.682	4.57987	5.55745	0.0511218	0.432929
ZNF426	51.599	3.25608	3.98613	0.0511218	0.432929
VILL	774.276	18.7185	5.37031	0.0511218	0.432929
KDR	213.049	5.58848	5.25259	0.0511218	0.432929
TPM2	1759.61	253.443	2.79552	0.0511218	0.432929
SNORD45B	0.700371	1.25382	-0.840141	0.0513024	0.43341
EID3	7.57559	0.74213	3.35161	0.0515636	0.43341
EGR2	308.704	4.12189	6.22677	0.0515637	0.43341
IPW	14.0769	0.767025	4.19792	0.0515637	0.43341
PDGFD	69.0542	3.90812	4.14318	0.0515637	0.43341
SPG20	142.268	4.51027	4.97925	0.0515637	0.43341
RAMP2	179.456	39.1443	2.19675	0.0515637	0.43341
EPB41L3	203.595	3.83676	5.72967	0.0515637	0.43341
NRP2	859.905	9.16533	6.55185	0.0515637	0.43341
ZC3H8	20.9964	4.44591	2.23959	0.0515637	0.43341
ADCY5	24.8157	4.71471	2.39601	0.0515637	0.43341
RFTN1	220.637	13.7415	4.00506	0.0515637	0.43341
CPEB2	118.534	4.13099	4.84267	0.0515637	0.43341
TBC1D9	193.514	5.93752	5.02644	0.0515637	0.43341
TRBV2	3.17514	1.14254	1.47457	0.0520052	0.435063
MTTP	6.03225	5.62784	0.100114	0.0520078	0.435063
LGI2	39.1425	2.21727	4.14188	0.0520088	0.435063
DEPDC5	107.484	2.92502	5.19954	0.0520088	0.435063
FANCB	8.57951	0.776189	3.46641	0.0520088	0.435063
LUZP1	335.373	6.25283	5.74511	0.0520088	0.435063
KCTD12	930.311	31.7645	4.87222	0.0520088	0.435063
VGLL3	293.562	1.58078	7.53688	0.0520088	0.435063
C8orf4	1071.52	21.3069	5.6522	0.0520088	0.435063
SLC28A2	133.768	5.62605	4.57147	0.0522289	0.436266
LOC100287722	38.6288	2.5901	3.8986	0.0524571	0.436266
HS3ST3B1	43.8474	0.902366	5.60263	0.0524571	0.436266
ACE2	64.6137	7.47708	3.11129	0.0524571	0.436266
CASP10	290.566	6.88752	5.39874	0.0524571	0.436266
ZC3H12D	20.9324	1.90989	3.45417	0.0524571	0.436266
DNAJB12	374.524	13.0936	4.83812	0.0524572	0.436266
ALDH6A1	106.617	9.424	3.49996	0.0524572	0.436266
SEC24D	1037.61	11.2072	6.5327	0.0524572	0.436266
UQCRQ	1036.05	64.9072	3.99658	0.0524572	0.436266
ROR2	251.553	4.76341	5.72272	0.0524572	0.436266
APCDD1L	40.0516	0.477682	6.38967	0.0526823	0.437712
MRC1	16.2341	0.217289	6.22327	0.0529068	0.437712
MAL	7.17306	74.6565	-3.37961	0.0529086	0.437712
LOC100506451	7.77586	0.80072	3.27963	0.0529087	0.437712
SEC11A	585.748	53.1306	3.46266	0.0529087	0.437712
RILP	132.711	9.18846	3.85232	0.0529087	0.437712
ACTG2	908.508	579.268	0.649269	0.0529087	0.437712
C5orf58	24.5362	1.18568	4.37113	0.0529087	0.437712
PON2	249.439	45.1139	2.46704	0.0529087	0.437712
ARSD	357.725	13.1091	4.77021	0.0529087	0.437712
S100A12	57.3479	3.3892	4.08072	0.0533626	0.437797
HCFC2	80.5525	2.87627	4.80766	0.0533633	0.437797
AK123947	42.1352	3.605	3.54695	0.0533634	0.437797
GFOD2	145.793	2.97863	5.61313	0.0533634	0.437797
LOC100506334	25.4587	1.3189	4.27075	0.0533634	0.437797
NLGN3	11.1235	0.759232	3.87293	0.0533634	0.437797
SALL2	22.3428	1.59356	3.80949	0.0533634	0.437797
PLCB2	97.2581	2.73045	5.15461	0.0533634	0.437797
PTGFRN	1406.78	21.3761	6.04026	0.0533635	0.437797
HVCN1	56.4201	4.83614	3.54428	0.0533635	0.437797
KLRB1	20.3882	6.52058	1.64467	0.0533635	0.437797
SPPL2A	393.807	22.9628	4.10012	0.0533635	0.437797
C17orf53	39.6198	2.5376	3.96468	0.0533635	0.437797
TMEM110-MUSTN1	108.334	3.92335	4.78725	0.0533635	0.437797
PPIP5K2	339.299	6.95077	5.60924	0.0533635	0.437797
HR	186.056	12.2869	3.92055	0.0533635	0.437797
TMED8	80.8076	3.83852	4.39587	0.0538214	0.439041
TEP1	317.916	5.96062	5.73704	0.0538215	0.439041
KLHL25	126	5.99594	4.39329	0.0538215	0.439041
LRRC42	179.747	13.852	3.6978	0.0538215	0.439041
GPR68	165.143	3.86182	5.41829	0.0538215	0.439041
TRIB2	345.808	12.5294	4.78658	0.0538215	0.439041
C4orf33	76.7983	5.57729	3.78344	0.0538215	0.439041
LRRC70	6.28559	1.00412	2.64612	0.0538215	0.439041
HNF4G	215.257	11.5008	4.22625	0.0538215	0.439041
PTCH1	64.8736	4.81598	3.75173	0.0538215	0.439041
ST6GALNAC4	362.546	22.5307	4.0082	0.0538215	0.439041
NOTUM	7.72857	57.4438	-2.89388	0.0540516	0.439317
WISP1	509.281	3.39051	7.23081	0.0542827	0.439317
RAB9B	5.88175	0.816613	2.84852	0.0542827	0.439317
FMO1	31.8161	1.58079	4.33104	0.0542828	0.439317
KIAA1683	12.8535	0.573653	4.48584	0.0542828	0.439317
PRDM6	16.202	0.783813	4.36952	0.0542828	0.439317
DPCR1	1276.61	37.9201	5.07321	0.0542828	0.439317
CIT	130.171	3.2614	5.31878	0.0542828	0.439317
CDH11	1676.58	14.9305	6.81111	0.0542828	0.439317
LEPREL4	311.439	14.5332	4.42152	0.0542828	0.439317
KLC3	26.2082	1.75079	3.90394	0.0542828	0.439317
ZNF562	204.292	6.06339	5.07436	0.0542828	0.439317
CCR5	57.7784	2.7988	4.36765	0.0542828	0.439317
CSF1R	847.263	14.8848	5.8309	0.0542828	0.439317
KAT6A	901.376	10.1439	6.47344	0.0542828	0.439317
CCDC129	26.4715	0.160295	7.36756	0.0544381	0.439317
PLP1	1.74792	1.36388	0.357919	0.0547399	0.439317
TREH	6.97456	1.33529	2.38495	0.0547473	0.439317
COL4A6	3.76928	1.42218	1.40618	0.0547473	0.439317
AK095221	44.9068	1.65853	4.75896	0.0547473	0.439317
CFLAR	1779.08	8.95313	7.63453	0.0547474	0.439317
RHBDD1	298.729	5.81184	5.6837	0.0547474	0.439317
ACOX2	26.302	3.19043	3.04335	0.0547474	0.439317
AASDH	40.6521	1.53477	4.72724	0.0547474	0.439317
FCRL5	29.2249	1.07353	4.76676	0.0547474	0.439317
PBLD	161.77	7.26189	4.47745	0.0547474	0.439317
SLC18A2	237.073	6.88787	5.10513	0.0547474	0.439317
MGP	1064.36	189.977	2.48609	0.0547474	0.439317
SMAD9	27.2842	3.10105	3.13723	0.0547474	0.439317
PMP22	823.83	42.6355	4.27222	0.0547474	0.439317
PRKAR2A	201.628	14.6904	3.77875	0.0547474	0.439317
ADAM9	3242.57	37.6551	6.42815	0.0547474	0.439317
TRAV14DV4	3.40774	0.910232	1.90451	0.0551996	0.440382
TMEM82	4.7183	2.42545	0.960014	0.0552059	0.440382
GPRASP1	20.0036	1.49745	3.73968	0.0552153	0.440382
DSEL	48.6921	0.886864	5.77883	0.0552153	0.440382
DUSP22	147.588	8.51711	4.11506	0.0552153	0.440382
ZMYM3	233.888	7.22625	5.01643	0.0552153	0.440382
PTPN22	42.9582	2.36638	4.18218	0.0552154	0.440382
THSD1	14.7604	1.26283	3.547	0.0552154	0.440382
EMR2	195.368	1.86621	6.70993	0.0552154	0.440382
CRIPT	115.783	10.9582	3.40134	0.0552154	0.440382
GORASP1	415.039	13.8004	4.91046	0.0552154	0.440382
PURA	336.521	9.07454	5.21273	0.0552154	0.440382
AZU1	0.397943	1.47803	-1.89304	0.0554273	0.441681
A1BG-AS1	8.84824	0.765728	3.53049	0.0556864	0.441681
EDEM3	628.543	14.4369	5.44418	0.0556866	0.441681
COX18	83.3395	3.54026	4.55707	0.0556866	0.441681
SLC36A1	262.232	4.94444	5.7289	0.0556866	0.441681
SFT2D2	115.2	13.6936	3.07257	0.0556866	0.441681
LPXN	120.789	6.83392	4.14363	0.0556866	0.441681
HOXB2	445.046	7.98194	5.80107	0.0556866	0.441681
BC073897	169.111	25.8724	2.70849	0.0556866	0.441681
SLC4A1AP	180.961	8.9116	4.34385	0.0556866	0.441681
ARHGEF26	36.0497	2.83153	3.67033	0.0556866	0.441681
TRA	5.65416	0.965426	2.55007	0.0561487	0.442329
SNCA	10.3723	0.836032	3.63304	0.056161	0.442329
C14orf132	48.3198	3.36597	3.84352	0.0561611	0.442329
ADAMTS8	7.97949	2.18411	1.86925	0.0561612	0.442329
BC071809	10.7377	2.73864	1.97116	0.0561612	0.442329
KCMF1	555.825	8.6116	6.01221	0.0561612	0.442329
PLA2G4A	168.505	6.35794	4.72809	0.0561612	0.442329
LRP10	7076.8	84.8036	6.38283	0.0561612	0.442329
HAUS5	112.55	4.08237	4.78502	0.0561612	0.442329
MAFB	545.732	14.7597	5.20845	0.0561612	0.442329
CRELD2	409.606	14.486	4.8215	0.0561612	0.442329
[truncated: 13,763 more rows]
